# Supplementary material for: Designing biphenanthridine-based singlet fission materials using computational chemistry
Source: Royal Society of Chemistry journal article supplement (doi:10.1039/d3me00181d), 2024-01-01
Supplement: d3me00181d1.pdf [file d3me00181d1.pdf]

# *Supporting Information*

*for*

# Designing Biphenanthridine-Based Singlet Fission Materials Using Computational Chemistry

*Keighlynn A. Veilleux, Georg Schreckenbach,\* David E. Herbert\**

Department of Chemistry and the Manitoba Institute for Materials, University of Manitoba, 144

Dysart Road, Winnipeg, Manitoba, R3T 2N2, Canada

\*schrecke@cc.umanitoba.ca; david.herbert@umanitoba.ca

## Table of Contents

|                                                                                                                                                                                                                      |    |
|----------------------------------------------------------------------------------------------------------------------------------------------------------------------------------------------------------------------|----|
| <b>Figure S1.</b> HOMO-29 of <b>5</b> illustrating $\pi$ conjugation across the two phenanthridinyl sub-units..                                                                                                      | 3  |
| <b>Figure S2.</b> Selected molecular orbitals of <b>1</b> and <b>2</b> .                                                                                                                                             | 3  |
| <b>Figure S3.</b> Selected molecular orbitals of <b>6</b> and <b>7</b> .                                                                                                                                             | 4  |
| <b>Figure S4.</b> Frontier molecular orbitals of <b>8</b> and <b>9</b> .                                                                                                                                             | 4  |
| <b>Figure S5.</b> Selected molecular orbitals of <b>10-13</b> .                                                                                                                                                      | 5  |
| <b>Figure S6.</b> Selected molecular orbitals of <b>14-17</b> .                                                                                                                                                      | 6  |
| <b>Figure S7.</b> Selected molecular orbitals of <b>18-21</b> .                                                                                                                                                      | 6  |
| <b>Figure S8.</b> Frontier molecular orbitals of <b>22-24</b> .                                                                                                                                                      | 7  |
| <b>Figure S9.</b> Frontier molecular orbitals of <b>25-27</b> .                                                                                                                                                      | 7  |
| <b>Figure S10.</b> Frontier molecular orbitals of <b>28-30</b> .                                                                                                                                                     | 8  |
| <b>Figure S11.</b> Selected molecular orbitals of <b>31</b> and <b>32</b> .                                                                                                                                          | 8  |
| <b>Figure S12.</b> Frontier molecular orbitals of <b>33-36</b> .                                                                                                                                                     | 9  |
| <b>Figure S13.</b> Selected molecular orbitals of <b>37-40</b> .                                                                                                                                                     | 9  |
| <b>Figure S14.</b> Selected molecular orbitals of <b>41-42</b> .                                                                                                                                                     | 10 |
| <b>Figure S15.</b> Selected molecular orbitals of <b>43-45</b> .                                                                                                                                                     | 10 |
| <b>Figure S16.</b> Selected molecular orbitals of <b>46-49</b> .                                                                                                                                                     | 11 |
| <b>Figure S17.</b> Frontier molecular orbitals of <b>50-53</b> .                                                                                                                                                     | 11 |
| <b>Table S1.</b> TD-DFT vertical excitation energies, oscillator strengths, and MO contributions (>1%) of the two lowest $S_0 \rightarrow S_n$ transitions (TD-RJCOSX-O3LYP/def2-TZVP+def2/J//PBE0-D3(BJ)/def2-SVP). | 12 |
| <b>Table S2.</b> Selected bond lengths of ground-state optimized geometries in vacuum (PBE0-D3(BJ)/def2-SVP).                                                                                                        | 18 |
| <b>Table S3.</b> Selected dihedral angles of ground-state optimized geometries in vacuum (PBE0-D3(BJ)/def2-SVP).                                                                                                     | 20 |
| <b>Optimized Coordinates</b> .                                                                                                                                                                                       | 22 |

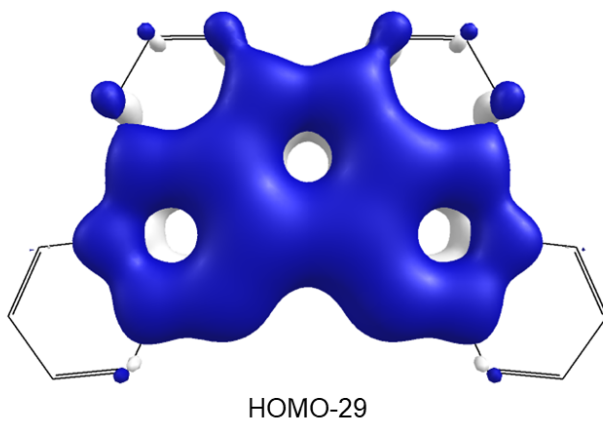

**Figure S1.** HOMO-29 of **5** illustrating  $\pi$  conjugation across the two phenanthridinyl sub-units.

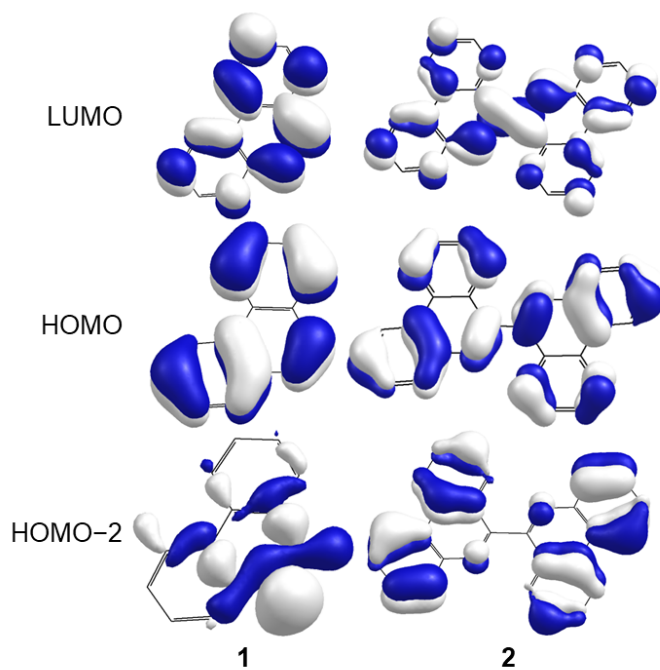

**Figure S2.** Selected molecular orbitals of **1** and **2**.

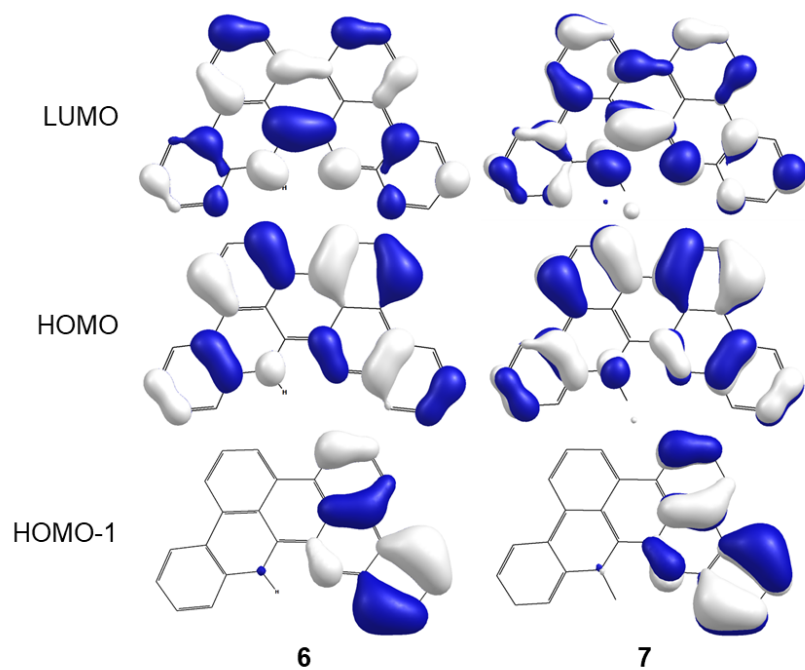

**Figure S3.** Selected molecular orbitals of **6** and **7**.

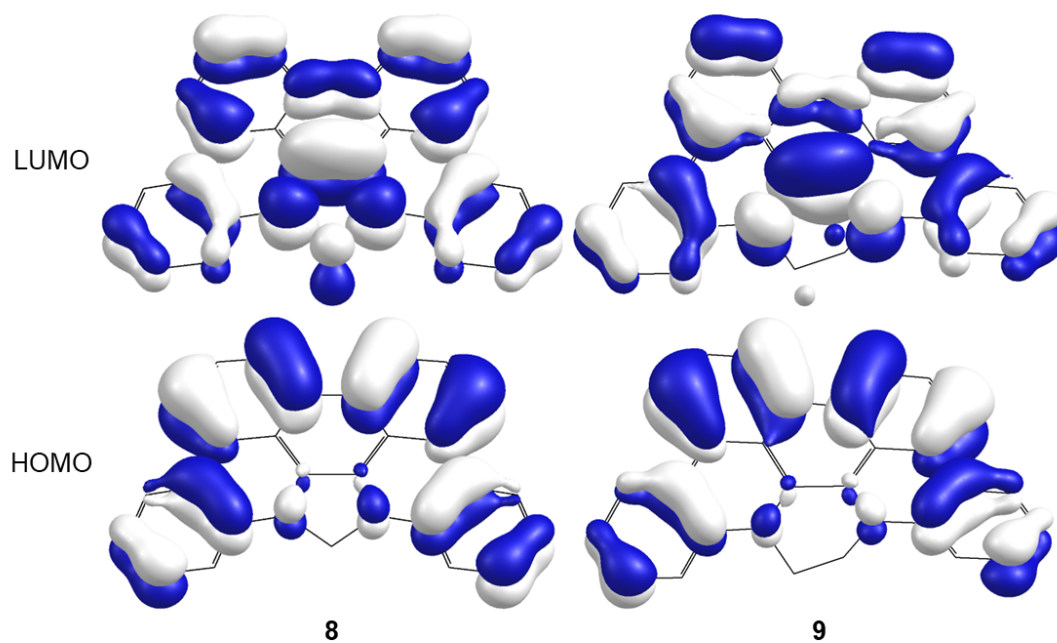

**Figure S4.** Frontier molecular orbitals of **8** and **9**.

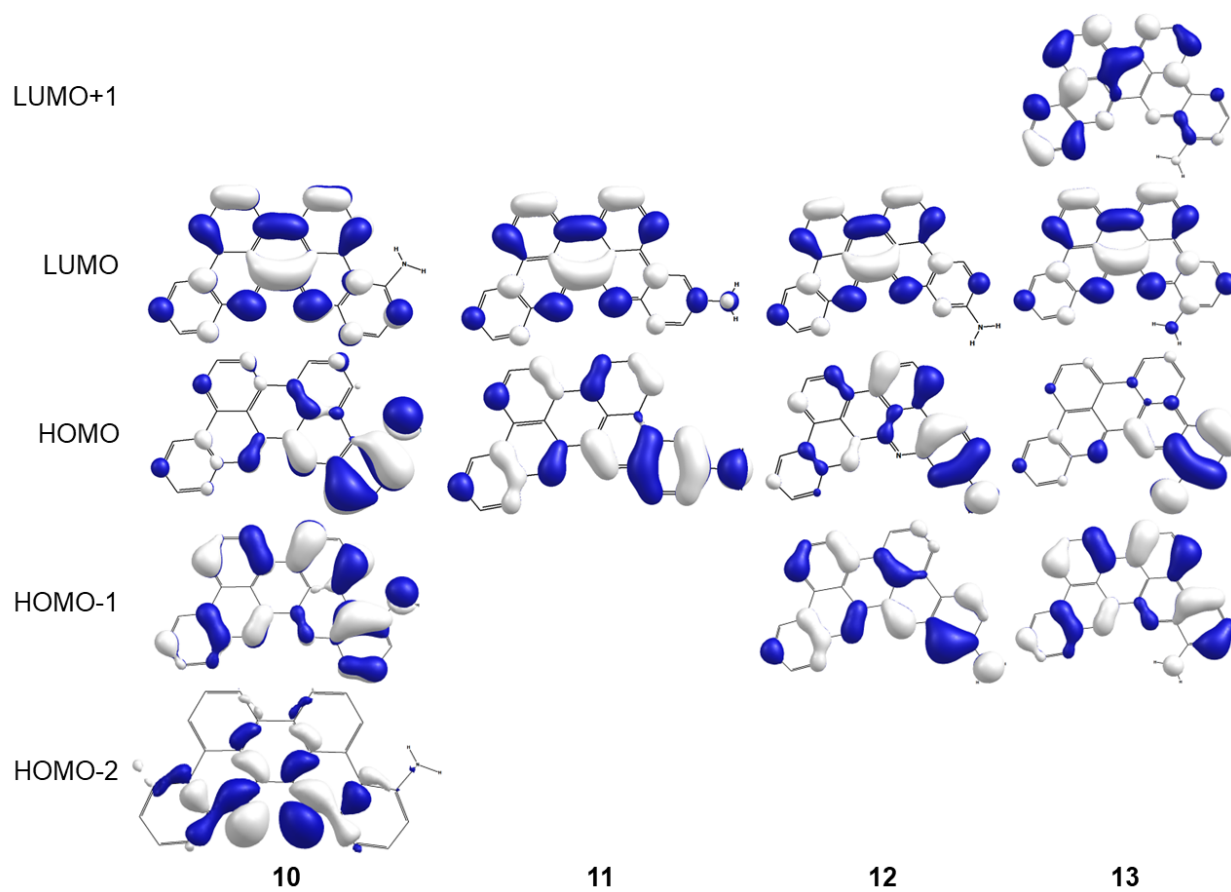

**Figure S5.** Selected molecular orbitals of **10-13**.

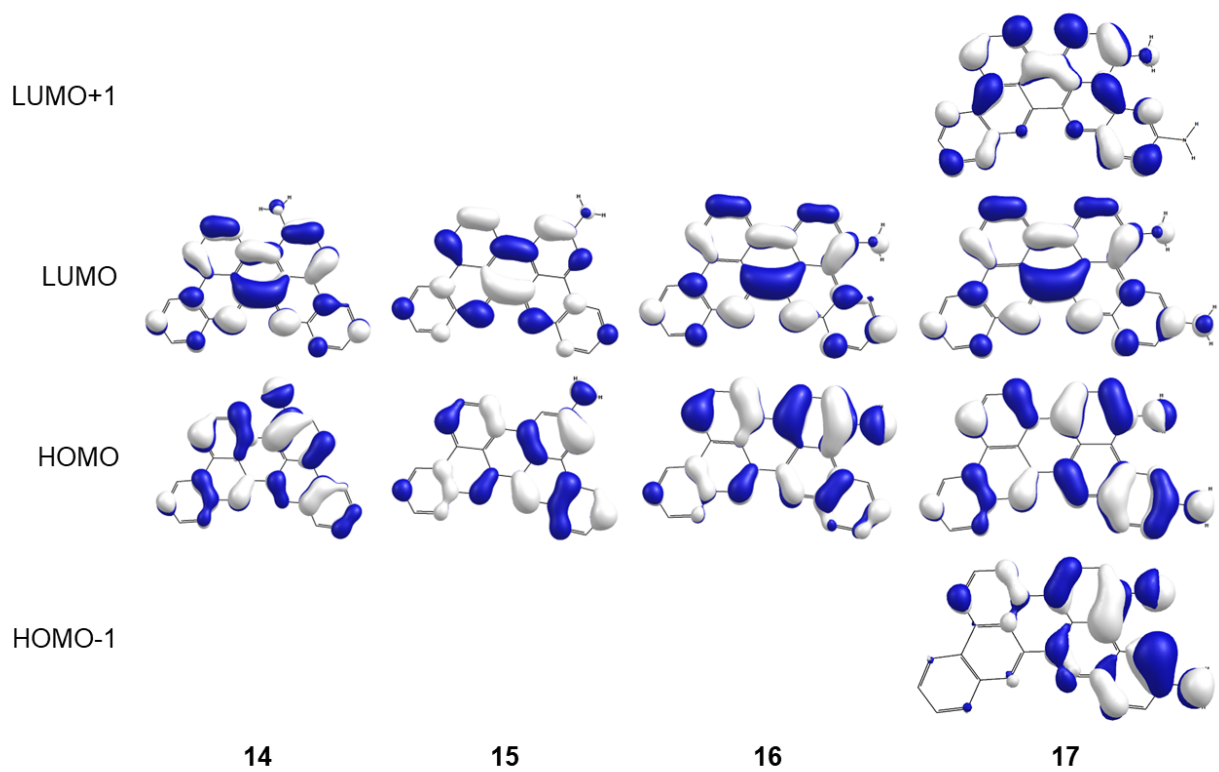

**Figure S6.** Selected molecular orbitals of 14-17.

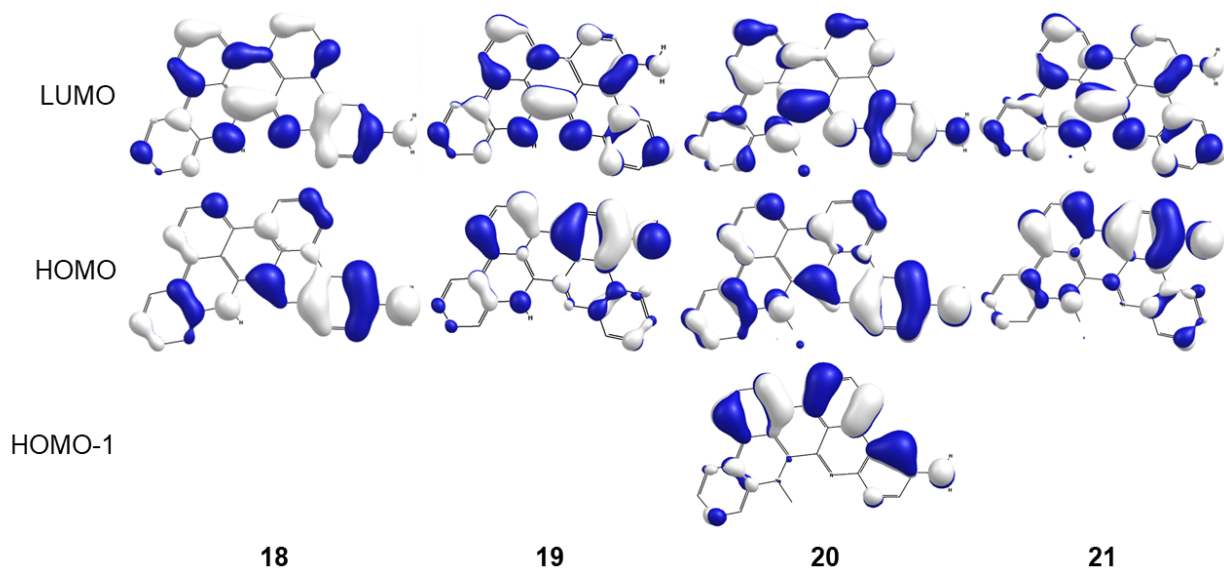

**Figure S7.** Selected molecular orbitals of 18-21.

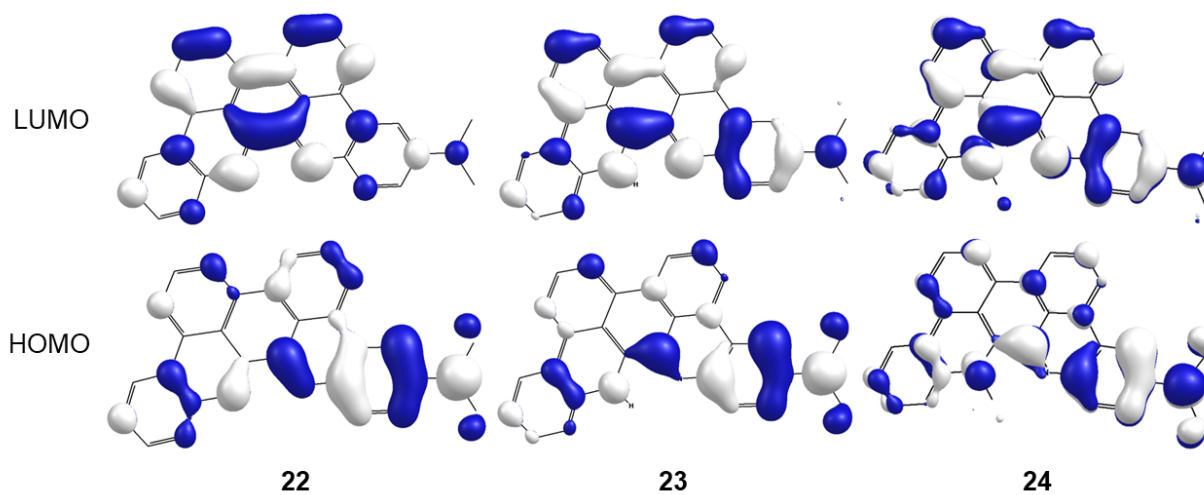

**Figure S8.** Frontier molecular orbitals of 22-24.

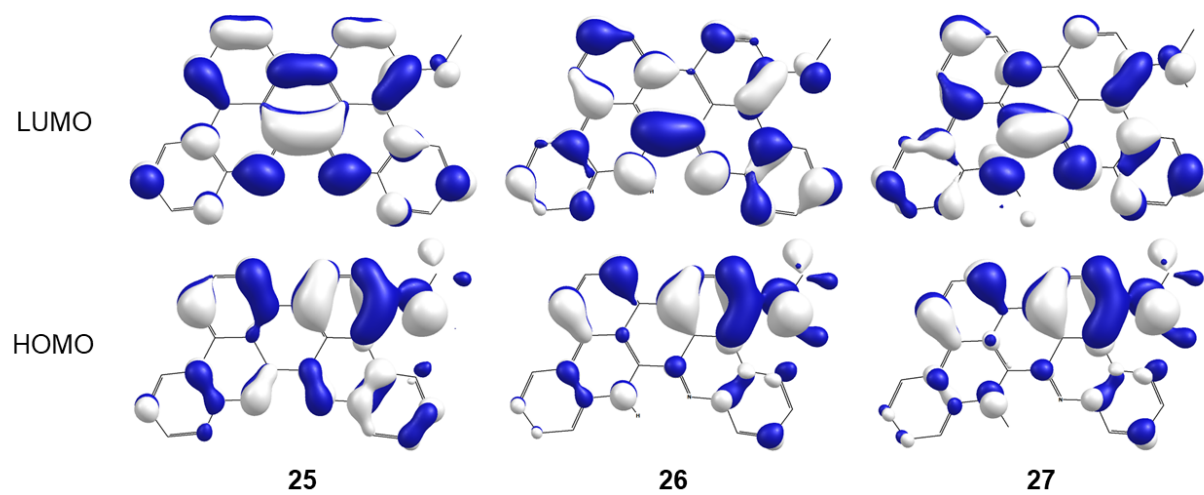

**Figure S9.** Frontier molecular orbitals of 25-27.

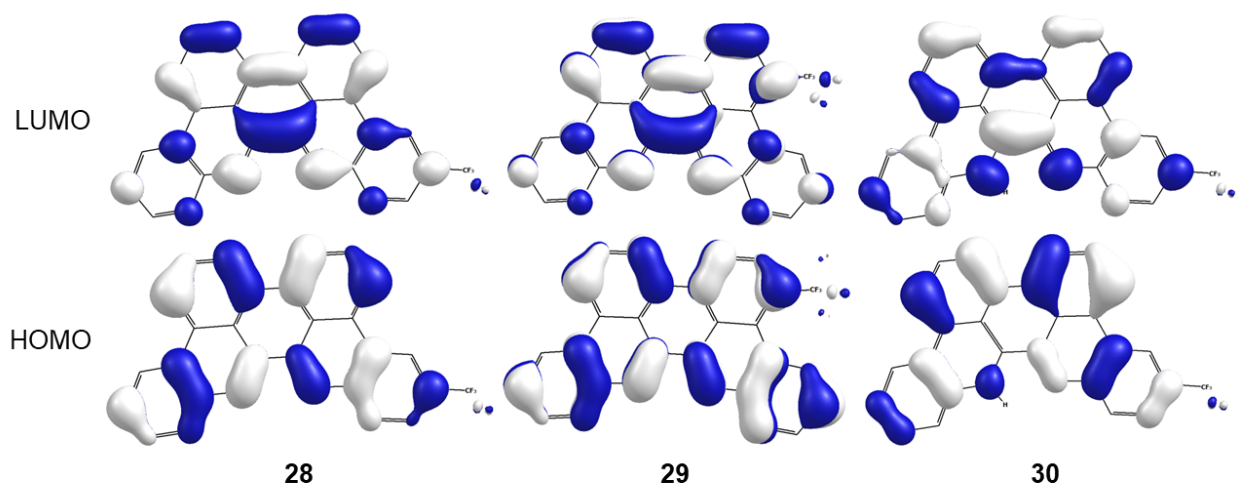

**Figure S10.** Frontier molecular orbitals of 28-30.

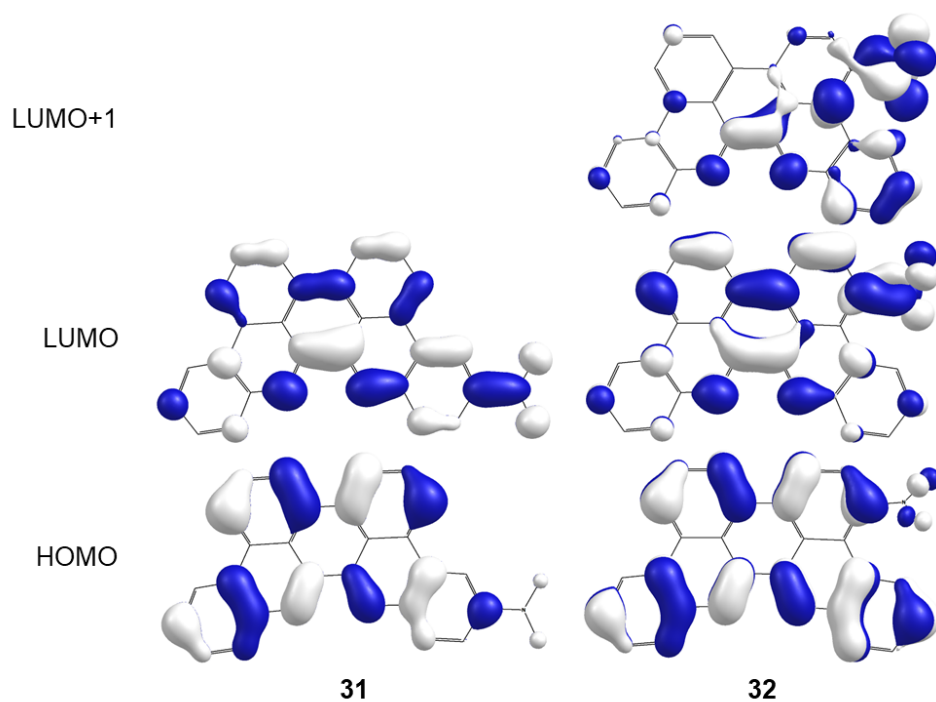

**Figure S11.** Selected molecular orbitals of 31 and 32.



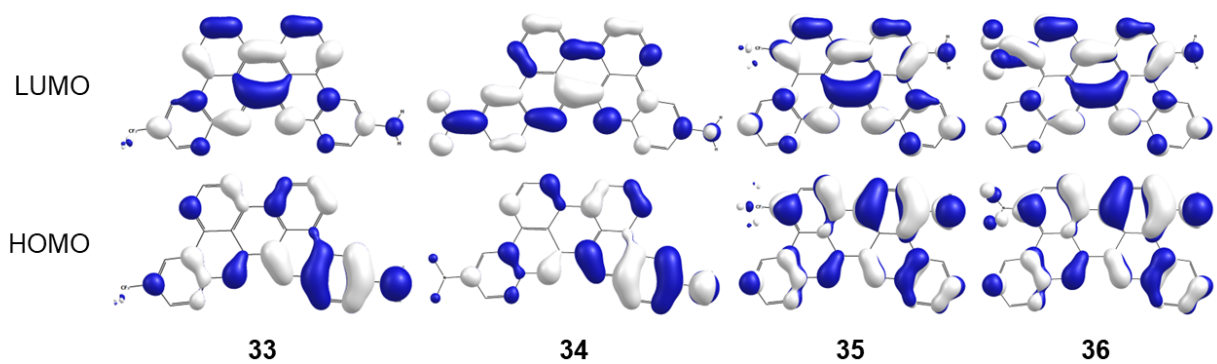

**Figure S12.** Frontier molecular orbitals of 33-36.

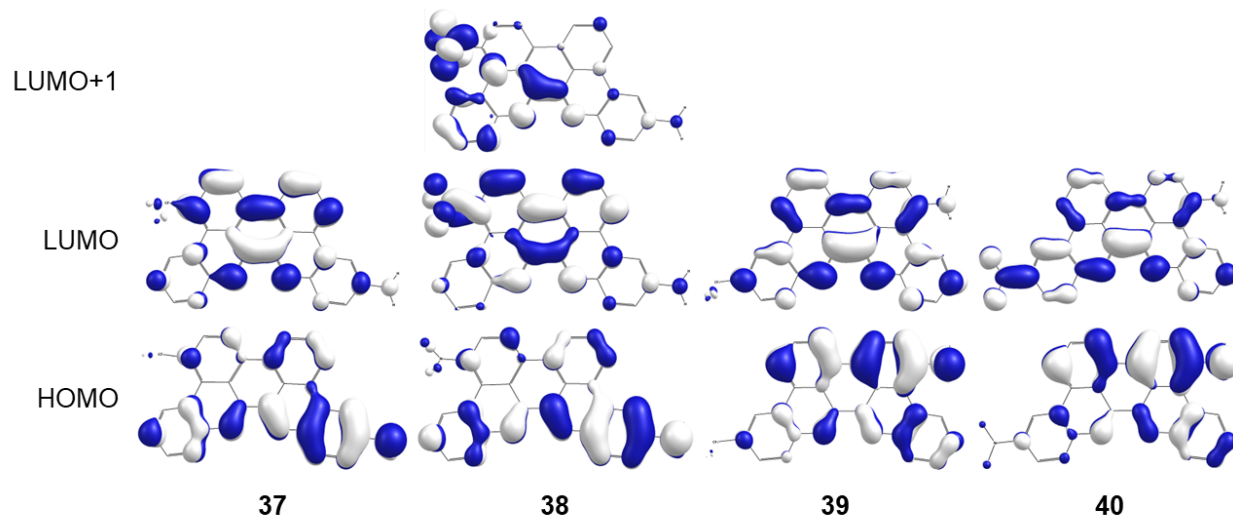

**Figure S13.** Selected molecular orbitals of 37-40.

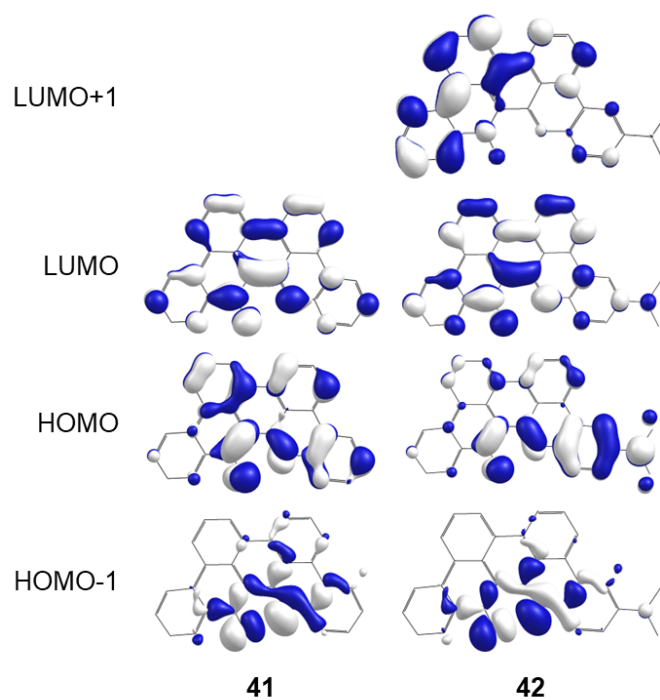

**Figure S14.** Selected molecular orbitals of 41-42.

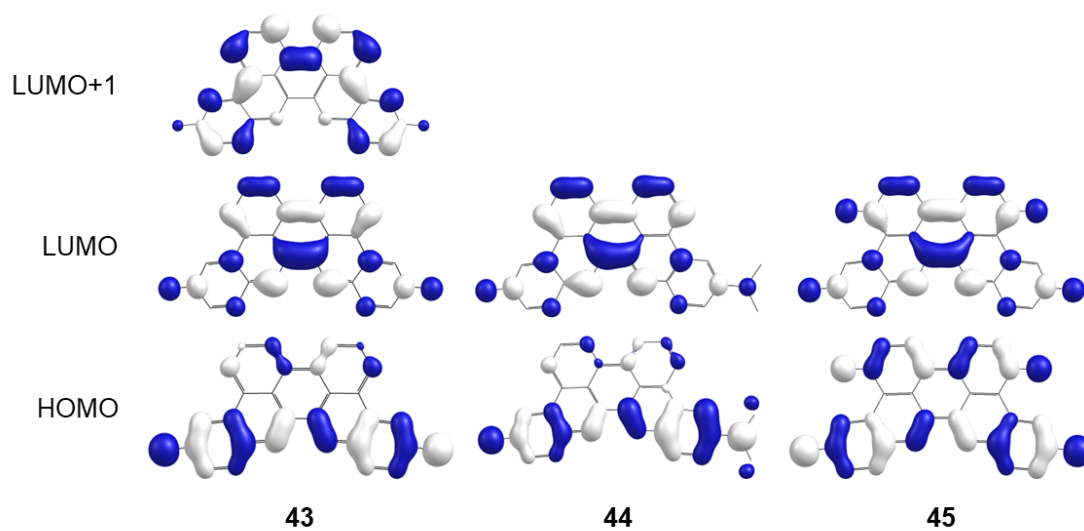

**Figure S15.** Selected molecular orbitals of 43-45.

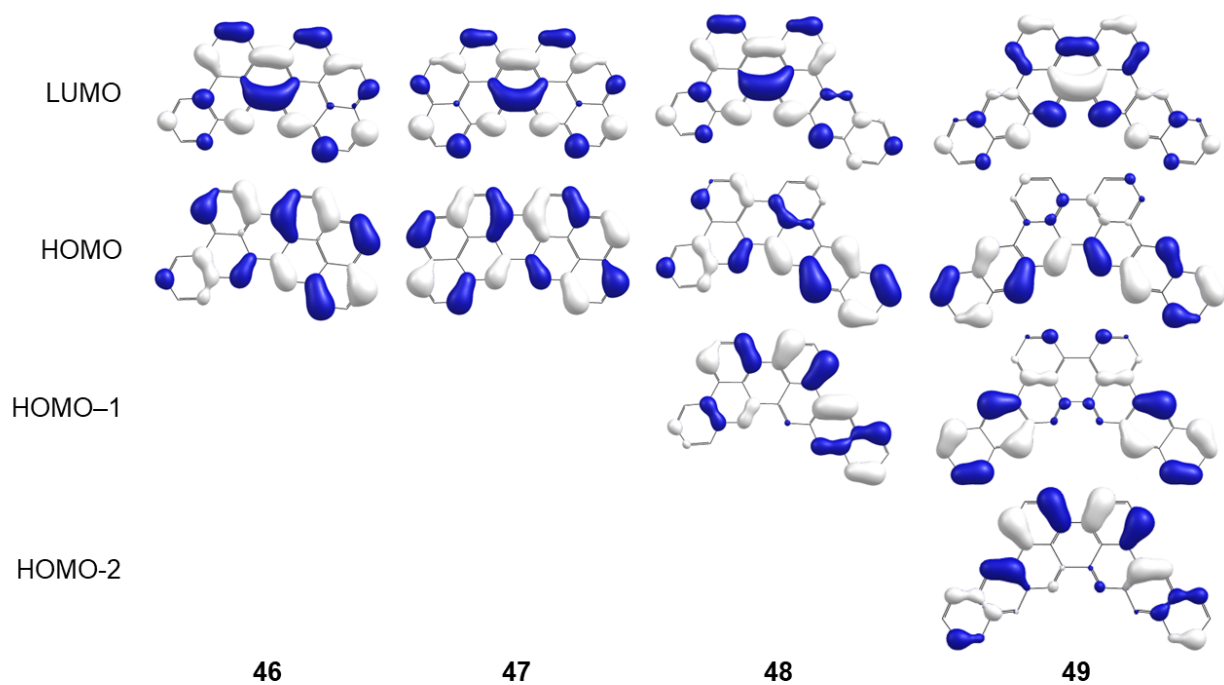

**Figure S16.** Selected molecular orbitals of 46-49.

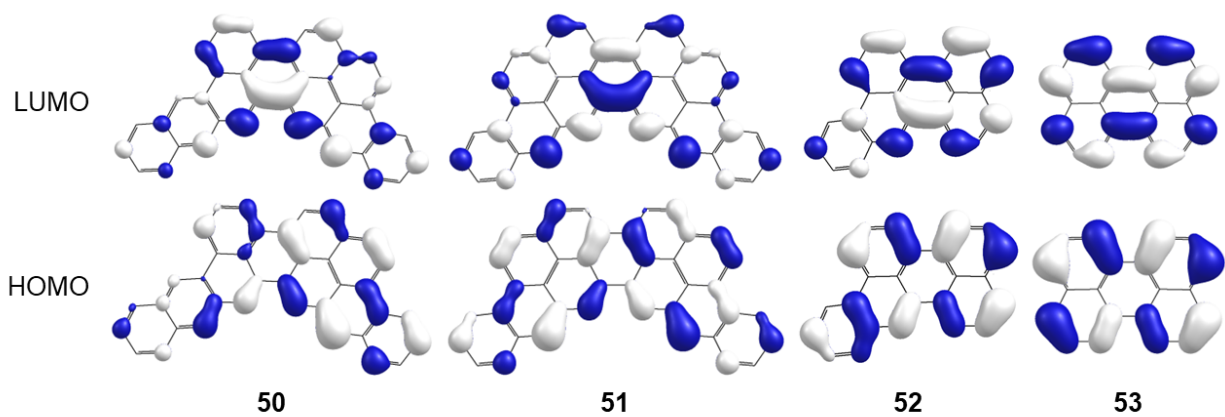

**Figure S17.** Frontier molecular orbitals of 50-53.

**Table S1.** TD-DFT vertical excitation energies, oscillator strengths, and MO contributions (>1%) of the two lowest  $S_0 \rightarrow S_n$  transitions (TD-RJCOSX-O3LYP/def2-TZVP+def2/J//PBE0-D3(BJ)/def2-SVP).

| Structure | $S_n$ | E (eV) | $f_{osc}$ | MO contributions                                                                                                                                                                                         |
|-----------|-------|--------|-----------|----------------------------------------------------------------------------------------------------------------------------------------------------------------------------------------------------------|
| 1         | $S_1$ | 3.90   | 0.004     | HOMO-1 $\rightarrow$ LUMO (54%), HOMO-1 $\rightarrow$ LUMO+1 (7%),<br>HOMO $\rightarrow$ LUMO (10%), HOMO $\rightarrow$ LUMO+1 (27%)                                                                     |
|           | $S_2$ | 3.99   | 0.001     | HOMO-2 $\rightarrow$ LUMO (99%)                                                                                                                                                                          |
| 2         | $S_1$ | 3.49   | 0.002     | HOMO-4 $\rightarrow$ LUMO (17%), HOMO-3 $\rightarrow$ LUMO (60%),<br>HOMO-1 $\rightarrow$ LUMO (20%), HOMO $\rightarrow$ LUMO+1 (1%)                                                                     |
|           | $S_2$ | 3.54   | 0.196     | HOMO-5 $\rightarrow$ LUMO (1%), HOMO-3 $\rightarrow$ LUMO+3 (1%),<br>HOMO-2 $\rightarrow$ LUMO (19%), HOMO-2 $\rightarrow$ LUMO+2 (2%),<br>HOMO $\rightarrow$ LUMO (71%), HOMO $\rightarrow$ LUMO+2 (2%) |
| 3         | $S_1$ | 2.40   | 0.021     | HOMO-1 $\rightarrow$ LUMO (3%), HOMO $\rightarrow$ LUMO (95%)                                                                                                                                            |
|           | $S_2$ | 2.57   | 0.142     | HOMO-2 $\rightarrow$ LUMO (1%), HOMO-1 $\rightarrow$ LUMO (91%),<br>HOMO $\rightarrow$ LUMO (3%)                                                                                                         |
| 4         | $S_1$ | 2.46   | 0.006     | HOMO-1 $\rightarrow$ LUMO (14%), HOMO $\rightarrow$ LUMO (86%)                                                                                                                                           |
|           | $S_2$ | 2.50   | 0.018     | HOMO-1 $\rightarrow$ LUMO (85%), HOMO $\rightarrow$ LUMO (14%)                                                                                                                                           |
| 5         | $S_1$ | 2.88   | 0.000     | HOMO-2 $\rightarrow$ LUMO (99%)                                                                                                                                                                          |
|           | $S_2$ | 2.91   | 0.571     | HOMO-6 $\rightarrow$ LUMO+1 (2%), HOMO-1 $\rightarrow$ LUMO (5%),<br>HOMO $\rightarrow$ LUMO (87%), HOMO $\rightarrow$ LUMO+1 (2%)                                                                       |
| 6         | $S_1$ | 2.35   | 0.252     | HOMO-2 $\rightarrow$ LUMO (2%), HOMO-1 $\rightarrow$ LUMO (24%),<br>HOMO $\rightarrow$ LUMO (67%), HOMO $\rightarrow$ LUMO+1 (1%),<br>HOMO $\rightarrow$ LUMO+2 (1%)                                     |
|           | $S_2$ | 2.52   | 0.187     | HOMO-3 $\rightarrow$ LUMO (3%), HOMO-2 $\rightarrow$ LUMO (3%),<br>HOMO-1 $\rightarrow$ LUMO (69%), HOMO $\rightarrow$ LUMO (20%)                                                                        |
| 7         | $S_1$ | 2.30   | 0.250     | HOMO-4 $\rightarrow$ LUMO (1%), HOMO-2 $\rightarrow$ LUMO (3%),<br>HOMO-1 $\rightarrow$ LUMO (13%), HOMO $\rightarrow$ LUMO (77%)                                                                        |
|           | $S_2$ | 2.50   | 0.127     | HOMO-4 $\rightarrow$ LUMO (5%), HOMO-2 $\rightarrow$ LUMO (4%),<br>HOMO-1 $\rightarrow$ LUMO (78%), HOMO $\rightarrow$ LUMO (9%),<br>HOMO $\rightarrow$ LUMO+2 (1%)                                      |
| 8         | $S_1$ | 1.96   | 0.215     | HOMO-4 $\rightarrow$ LUMO (4%), HOMO-1 $\rightarrow$ LUMO (7%),<br>HOMO $\rightarrow$ LUMO (85%)                                                                                                         |
|           | $S_2$ | 2.37   | 0.070     | HOMO-4 $\rightarrow$ LUMO (4%), HOMO-1 $\rightarrow$ LUMO (87%),<br>HOMO $\rightarrow$ LUMO (5%)                                                                                                         |
| 9         | $S_1$ | 1.76   | 0.192     | HOMO-4 $\rightarrow$ LUMO (5%), HOMO-1 $\rightarrow$ LUMO (4%),<br>HOMO $\rightarrow$ LUMO (88%)                                                                                                         |
|           | $S_2$ | 2.30   | 0.054     | HOMO-5 $\rightarrow$ LUMO (1%), HOMO-4 $\rightarrow$ LUMO (5%),<br>HOMO-1 $\rightarrow$ LUMO (89%), HOMO $\rightarrow$ LUMO (2%)                                                                         |
| 10        | $S_1$ | 2.46   | 0.060     | HOMO-1 $\rightarrow$ LUMO (23%), HOMO $\rightarrow$ LUMO (72%)                                                                                                                                           |

|    |                |      |       |                                                                                                                      |
|----|----------------|------|-------|----------------------------------------------------------------------------------------------------------------------|
|    | S <sub>2</sub> | 2.87 | 0.157 | HOMO-2→LUMO (70%), HOMO-1→LUMO (21%),<br>HOMO→LUMO (7%)                                                              |
| 11 | S <sub>1</sub> | 2.64 | 0.561 | HOMO-1→LUMO (4%), HOMO→LUMO (86%),<br>HOMO→LUMO+1 (4%)                                                               |
|    | S <sub>2</sub> | 2.93 | 0.000 | HOMO-2→LUMO (99%)                                                                                                    |
| 12 | S <sub>1</sub> | 2.46 | 0.091 | HOMO-1→LUMO (17%), HOMO→LUMO (79%)                                                                                   |
|    | S <sub>2</sub> | 2.87 | 0.000 | HOMO-2→LUMO (99%)                                                                                                    |
| 13 | S <sub>1</sub> | 2.15 | 0.155 | HOMO-1→LUMO (8%), HOMO→LUMO (89%)                                                                                    |
|    | S <sub>2</sub> | 2.89 | 0.402 | HOMO-6→LUMO+1 (1%), HOMO-2→LUMO (3%),<br>HOMO-1→LUMO (71%), HOMO-1→LUMO+1 (1%),<br>HOMO→LUMO (7%), HOMO→LUMO+1 (12%) |
| 14 | S <sub>1</sub> | 2.62 | 0.334 | HOMO-1→LUMO (7%), HOMO→LUMO (85%),<br>HOMO→LUMO+1 (3%)                                                               |
|    | S <sub>2</sub> | 2.91 | 0.003 | HOMO-3→LUMO (8%), HOMO-2→LUMO (90%)                                                                                  |
| 15 | S <sub>1</sub> | 2.75 | 0.283 | HOMO-1→LUMO (8%), HOMO→LUMO (85%)                                                                                    |
|    | S <sub>2</sub> | 2.90 | 0.000 | HOMO-2→LUMO (99%)                                                                                                    |
| 16 | S <sub>1</sub> | 2.51 | 0.345 | HOMO-1→LUMO (5%), HOMO→LUMO (86%),<br>HOMO→LUMO+1 (3%)                                                               |
|    | S <sub>2</sub> | 2.91 | 0.006 | HOMO-3→LUMO (5%), HOMO-2→LUMO (90%),<br>HOMO-1→LUMO (4%)                                                             |
| 17 | S <sub>1</sub> | 2.59 | 0.573 | HOMO-6→LUMO+1 (1%), HOMO-1→LUMO (7%),<br>HOMO-1→LUMO+3 (1%), HOMO→LUMO (84%),<br>HOMO→LUMO+1 (2%)                    |
|    | S <sub>2</sub> | 2.87 | 0.163 | HOMO-3→LUMO (1%), HOMO-2→LUMO (3%),<br>HOMO-1→LUMO (58%), HOMO→LUMO (8%),<br>HOMO→LUMO+1 (26%)                       |
| 18 | S <sub>1</sub> | 2.43 | 0.888 | HOMO-3→LUMO (2%), HOMO-3→LUMO+1 (1%),<br>HOMO-2→LUMO (2%), HOMO-1→LUMO (1%),<br>HOMO-1→LUMO+3 (1%), HOMO→LUMO (87%)  |
|    | S <sub>2</sub> | 2.51 | 0.037 | HOMO-1→LUMO (91%), HOMO→LUMO (1%),<br>HOMO→LUMO+2 (2%)                                                               |
| 19 | S <sub>1</sub> | 1.83 | 0.242 | HOMO-3→LUMO (2%), HOMO-1→LUMO (1%),<br>HOMO→LUMO (91%)                                                               |
|    | S <sub>2</sub> | 2.67 | 0.069 | HOMO-4→LUMO (1%), HOMO-3→LUMO (8%),<br>HOMO-1→LUMO (83%), HOMO→LUMO+2 (2%)                                           |
| 20 | S <sub>1</sub> | 2.41 | 0.542 | HOMO-2→LUMO (3%), HOMO-1→LUMO (37%),<br>HOMO-1→LUMO+3 (1%), HOMO→LUMO (53%)                                          |
|    | S <sub>2</sub> | 2.51 | 0.349 | HOMO-3→LUMO (2%), HOMO-2→LUMO (1%),<br>HOMO-1→LUMO (56%), HOMO→LUMO (32%),<br>HOMO→LUMO+2 (2%)                       |

|    |                |      |       |                                                                                                                 |
|----|----------------|------|-------|-----------------------------------------------------------------------------------------------------------------|
| 21 | S <sub>1</sub> | 1.83 | 0.238 | HOMO-3→LUMO (2%), HOMO→LUMO (92%),<br>HOMO→LUMO+3 (1%)                                                          |
|    | S <sub>2</sub> | 2.62 | 0.063 | HOMO-5→LUMO (5%), HOMO-3→LUMO (6%),<br>HOMO-1→LUMO (83%), HOMO→LUMO+2 (2%)                                      |
| 22 | S <sub>1</sub> | 2.46 | 0.552 | HOMO-1→LUMO (4%), HOMO→LUMO (87%),<br>HOMO→LUMO+1 (4%)                                                          |
|    | S <sub>2</sub> | 2.92 | 0.000 | HOMO-2→LUMO (99%)                                                                                               |
| 23 | S <sub>1</sub> | 2.30 | 0.951 | HOMO-2→LUMO (2%), HOMO-1→LUMO (4%),<br>HOMO→LUMO (85%)                                                          |
|    | S <sub>2</sub> | 2.48 | 0.163 | HOMO-1→LUMO (89%), HOMO-1→LUMO+1 (1%),<br>HOMO→LUMO (4%)                                                        |
| 24 | S <sub>1</sub> | 2.35 | 1.048 | HOMO-2→LUMO (3%), HOMO-1→LUMO+3 (1%),<br>HOMO→LUMO (88%)                                                        |
|    | S <sub>2</sub> | 2.42 | 0.058 | HOMO-1→LUMO (93%), HOMO-1→LUMO+1 (1%),<br>HOMO→LUMO+2 (1%)                                                      |
| 25 | S <sub>1</sub> | 2.46 | 0.303 | HOMO-1→LUMO (8%), HOMO→LUMO (84%),<br>HOMO→LUMO+1 (4%)                                                          |
|    | S <sub>2</sub> | 2.91 | 0.026 | HOMO-3→LUMO (11%), HOMO-2→LUMO (78%),<br>HOMO-1→LUMO (9%), HOMO→LUMO (1%)                                       |
| 26 | S <sub>1</sub> | 1.74 | 0.256 | HOMO-1→LUMO (1%), HOMO→LUMO (92%),<br>HOMO→LUMO+1 (1%)                                                          |
|    | S <sub>2</sub> | 2.60 | 0.091 | HOMO-4→LUMO (1%), HOMO-3→LUMO (4%),<br>HOMO-2→LUMO (10%), HOMO-1→LUMO (77%),<br>HOMO→LUMO+2 (1%)                |
| 27 | S <sub>1</sub> | 1.76 | 0.263 | HOMO-3→LUMO (1%), HOMO→LUMO (92%),<br>HOMO→LUMO+1 (1%)                                                          |
|    | S <sub>2</sub> | 2.57 | 0.087 | HOMO-5→LUMO (5%), HOMO-3→LUMO (5%),<br>HOMO-2→LUMO (3%), HOMO-1→LUMO (82%),<br>HOMO→LUMO+2 (1%)                 |
| 28 | S <sub>1</sub> | 2.86 | 0.000 | HOMO-2→LUMO (99%)                                                                                               |
|    | S <sub>2</sub> | 2.87 | 0.545 | HOMO-5→LUMO+1 (1%), HOMO-1→LUMO (6%),<br>HOMO→LUMO (84%), HOMO→LUMO+1 (3%)                                      |
| 29 | S <sub>1</sub> | 2.80 | 0.006 | HOMO-3→LUMO (3%), HOMO-2→LUMO (70%),<br>HOMO-1→LUMO (25%)                                                       |
|    | S <sub>2</sub> | 2.86 | 0.574 | HOMO-6→LUMO+1 (2%), HOMO-1→LUMO (4%),<br>HOMO→LUMO (87%), HOMO→LUMO+1 (2%)                                      |
| 30 | S <sub>1</sub> | 2.34 | 0.317 | HOMO-4→LUMO (1%), HOMO-3→LUMO (2%),<br>HOMO-2→LUMO (2%), HOMO-1→LUMO (8%),<br>HOMO→LUMO (82%), HOMO→LUMO+1 (1%) |

|    |                |      |       |                                                                                                                  |
|----|----------------|------|-------|------------------------------------------------------------------------------------------------------------------|
|    | S <sub>2</sub> | 2.59 | 0.105 | HOMO-3→LUMO (2%), HOMO-2→LUMO (2%),<br>HOMO-1→LUMO (85%), HOMO→LUMO (6%),<br>HOMO→LUMO+2 (1%)                    |
| 31 | S <sub>1</sub> | 2.65 | 0.510 | HOMO-1→LUMO (4%), HOMO→LUMO (85%),<br>HOMO→LUMO+1 (5%)                                                           |
|    | S <sub>2</sub> | 2.74 | 0.000 | HOMO-2→LUMO (98%)                                                                                                |
| 32 | S <sub>1</sub> | 2.66 | 0.337 | HOMO-3→LUMO (1%), HOMO-1→LUMO (6%),<br>HOMO→LUMO (70%), HOMO→LUMO+1 (19%)                                        |
|    | S <sub>2</sub> | 2.76 | 0.003 | HOMO-3→LUMO (2%), HOMO-2→LUMO (90%),<br>HOMO-2→LUMO+1 (2%), HOMO-1→LUMO (4%)                                     |
| 33 | S <sub>1</sub> | 2.61 | 0.616 | HOMO-1→LUMO (4%), HOMO→LUMO (87%),<br>HOMO→LUMO+1 (3%)                                                           |
|    | S <sub>2</sub> | 2.91 | 0.000 | HOMO-2→LUMO (99%)                                                                                                |
| 34 | S <sub>1</sub> | 2.45 | 0.748 | HOMO→LUMO (90%), HOMO→LUMO+1 (3%),<br>HOMO→LUMO+2 (1%)                                                           |
|    | S <sub>2</sub> | 2.78 | 0.000 | HOMO-2→LUMO (98%)                                                                                                |
| 35 | S <sub>1</sub> | 2.56 | 0.410 | HOMO-1→LUMO (5%), HOMO→LUMO (85%),<br>HOMO→LUMO+1 (4%)                                                           |
|    | S <sub>2</sub> | 2.86 | 0.006 | HOMO-3→LUMO (8%), HOMO-2→LUMO (90%)                                                                              |
| 36 | S <sub>1</sub> | 2.51 | 0.530 | HOMO-1→LUMO (2%), HOMO-1→LUMO+1 (1%),<br>HOMO→LUMO (88%), HOMO→LUMO+1 (1%),<br>HOMO→LUMO+2 (1%)                  |
|    | S <sub>2</sub> | 2.66 | 0.039 | HOMO-3→LUMO (1%), HOMO-1→LUMO (11%),<br>HOMO→LUMO (2%), HOMO→LUMO+1 (83%)                                        |
| 37 | S <sub>1</sub> | 2.49 | 0.467 | HOMO-1→LUMO (3%), HOMO→LUMO (86%),<br>HOMO→LUMO+1 (6%), HOMO→LUMO+3 (1%)                                         |
|    | S <sub>2</sub> | 2.85 | 0.001 | HOMO-3→LUMO (9%), HOMO-2→LUMO (88%),<br>HOMO-1→LUMO (2%)                                                         |
| 38 | S <sub>1</sub> | 2.26 | 0.280 | HOMO-1→LUMO (2%), HOMO→LUMO (81%),<br>HOMO→LUMO+1 (14%)                                                          |
|    | S <sub>2</sub> | 2.76 | 0.244 | HOMO-3→LUMO (2%), HOMO-2→LUMO (15%),<br>HOMO-1→LUMO (1%), HOMO→LUMO (9%),<br>HOMO→LUMO+1 (65%), HOMO→LUMO+2 (1%) |
| 39 | S <sub>1</sub> | 2.44 | 0.332 | HOMO-1→LUMO (4%), HOMO→LUMO (88%),<br>HOMO→LUMO+1 (3%)                                                           |
|    | S <sub>2</sub> | 2.89 | 0.007 | HOMO-2→LUMO (87%), HOMO-1→LUMO (12%)                                                                             |
| 40 | S <sub>1</sub> | 2.20 | 0.309 | HOMO-1→LUMO (3%), HOMO→LUMO (90%),<br>HOMO→LUMO+1 (3%)                                                           |
|    | S <sub>2</sub> | 2.76 | 0.003 | HOMO-2→LUMO (83%), HOMO-1→LUMO (14%),<br>HOMO→LUMO+1 (1%)                                                        |

|    |                |      |       |                                                                                                                                            |
|----|----------------|------|-------|--------------------------------------------------------------------------------------------------------------------------------------------|
| 41 | S <sub>1</sub> | 2.24 | 0.008 | HOMO-1→LUMO (84%), HOMO→LUMO (14%)                                                                                                         |
|    | S <sub>2</sub> | 2.84 | 0.004 | HOMO-2→LUMO (25%), HOMO→LUMO+1 (73%)                                                                                                       |
| 42 | S <sub>1</sub> | 2.26 | 0.060 | HOMO-2→LUMO (3%), HOMO-1→LUMO (75%),<br>HOMO→LUMO (19%)                                                                                    |
|    | S <sub>2</sub> | 2.47 | 0.326 | HOMO-2→LUMO (6%), HOMO-1→LUMO (19%),<br>HOMO→LUMO (43%), HOMO→LUMO+1 (28%)                                                                 |
| 43 | S <sub>1</sub> | 2.49 | 0.622 | HOMO-7→LUMO+1 (1%), HOMO-2→LUMO (1%),<br>HOMO→LUMO (75%), HOMO→LUMO+1 (15%),<br>HOMO→LUMO+3 (4%)                                           |
|    | S <sub>2</sub> | 2.81 | 0.230 | HOMO-7→LUMO (2%), HOMO-2→LUMO (22%),<br>HOMO→LUMO (12%), HOMO→LUMO+1 (59%),<br>HOMO→LUMO+3 (2%)                                            |
| 44 | S <sub>1</sub> | 2.35 | 0.652 | HOMO-2→LUMO (2%), HOMO-1→LUMO (3%),<br>HOMO→LUMO (82%), HOMO→LUMO+1 (8%),<br>HOMO→LUMO+3 (1%)                                              |
|    | S <sub>2</sub> | 2.71 | 0.053 | HOMO-7→LUMO (2%), HOMO-2→LUMO (4%),<br>HOMO-1→LUMO (32%), HOMO→LUMO (2%),<br>HOMO→LUMO+1 (56%), HOMO→LUMO+2 (2%)                           |
| 45 | S <sub>1</sub> | 2.21 | 0.657 | HOMO-9→LUMO+1 (1%), HOMO-1→LUMO (4%),<br>HOMO-1→LUMO+1 (5%), HOMO-1→LUMO+3<br>(4%), HOMO→LUMO (73%), HOMO→LUMO+1<br>(7%), HOMO→LUMO+3 (2%) |
|    | S <sub>2</sub> | 2.27 | 0.089 | HOMO-1→LUMO (52%), HOMO-1→LUMO+1 (2%),<br>HOMO→LUMO (9%), HOMO→LUMO+1 (35%)                                                                |
| 46 | S <sub>1</sub> | 2.65 | 0.583 | HOMO-6→LUMO (1%), HOMO-1→LUMO (1%),<br>HOMO→LUMO (87%), HOMO→LUMO+1 (2%),<br>HOMO→LUMO+2 (2%)                                              |
|    | S <sub>2</sub> | 2.80 | 0.000 | HOMO-3→LUMO (99%)                                                                                                                          |
| 47 | S <sub>1</sub> | 2.43 | 0.680 | HOMO-6→LUMO (3%), HOMO-6→LUMO+3 (1%),<br>HOMO-3→LUMO (2%), HOMO-3→LUMO+2 (2%),<br>HOMO→LUMO (89%)                                          |
|    | S <sub>2</sub> | 2.74 | 0.000 | HOMO-2→LUMO (99%)                                                                                                                          |
| 48 | S <sub>1</sub> | 2.52 | 0.083 | HOMO-1→LUMO (40%), HOMO→LUMO (48%),<br>HOMO→LUMO+1 (8%)                                                                                    |
|    | S <sub>2</sub> | 2.81 | 0.627 | HOMO-3→LUMO (1%), HOMO-1→LUMO (43%),<br>HOMO→LUMO (45%), HOMO→LUMO+1 (5%)                                                                  |
| 49 | S <sub>1</sub> | 2.45 | 0.128 | HOMO-2→LUMO (30%), HOMO→LUMO (61%),<br>HOMO→LUMO+1 (6%)                                                                                    |
|    | S <sub>2</sub> | 2.51 | 0.046 | HOMO-1→LUMO (90%), HOMO→LUMO+2 (7%)                                                                                                        |



|           |                      |      |       |                                                                                                   |
|-----------|----------------------|------|-------|---------------------------------------------------------------------------------------------------|
| <b>50</b> | <b>S<sub>1</sub></b> | 2.34 | 0.089 | HOMO-2→LUMO (1%), HOMO-1→LUMO (79%),<br>HOMO→LUMO (10%), HOMO→LUMO+1 (7%)                         |
|           | <b>S<sub>2</sub></b> | 2.36 | 0.492 | HOMO-2→LUMO (2%), HOMO-1→LUMO (8%),<br>HOMO→LUMO (76%), HOMO→LUMO+1 (6%),<br>HOMO→LUMO+2 (1%)     |
| <b>51</b> | <b>S<sub>1</sub></b> | 2.17 | 0.728 | HOMO-5→LUMO (3%), HOMO-2→LUMO (1%),<br>HOMO→LUMO (90%)                                            |
|           | <b>S<sub>2</sub></b> | 2.35 | 0.045 | HOMO-1→LUMO (80%), HOMO→LUMO+1 (18%)                                                              |
| <b>52</b> | <b>S<sub>1</sub></b> | 2.85 | 0.000 | HOMO-1→LUMO (99%)                                                                                 |
|           | <b>S<sub>2</sub></b> | 2.96 | 0.549 | HOMO-5→LUMO+1 (1%), HOMO-4→LUMO+1<br>(1%), HOMO-2→LUMO (3%), HOMO→LUMO<br>(89%), HOMO→LUMO+1 (1%) |
| <b>53</b> | <b>S<sub>1</sub></b> | 2.82 | 0.000 | HOMO-1→LUMO (99%)                                                                                 |
|           | <b>S<sub>2</sub></b> | 3.19 | 0.001 | HOMO-2→LUMO (99%)                                                                                 |

**Table S2.** Selected bond lengths of ground-state optimized geometries in vacuum (PBE0-D3(BJ)/def2-SVP).

| Structure | Bond length (Å) |            |            |             |
|-----------|-----------------|------------|------------|-------------|
|           | C(6)-C(6')      | C(7)-C(7') | N(5)-C(6)  | N(5')-C(6') |
| 1         | <i>n/a</i>      | <i>n/a</i> | <i>n/a</i> | <i>n/a</i>  |
| 2         | 1.497           | <i>n/a</i> | 1.299      | 1.299       |
| 3         | 1.488           | <i>n/a</i> | 1.322      | 1.304       |
| 4         | 1.497           | <i>n/a</i> | 1.328      | 1.296       |
| 5         | 1.483           | 1.473      | 1.302      | 1.302       |
| 6         | 1.456           | 1.471      | 1.322      | 1.307       |
| 7         | 1.470           | 1.464      | 1.345      | 1.310       |
| 8         | 1.405           | 1.484      | 1.327      | 1.327       |
| 9         | 1.472           | 1.460      | 1.344      | 1.344       |
| 10        | 1.483           | 1.473      | 1.300      | 1.302       |
| 11        | 1.480           | 1.473      | 1.305      | 1.303       |
| 12        | 1.484           | 1.473      | 1.302      | 1.302       |
| 13        | 1.477           | 1.473      | 1.304      | 1.304       |
| 14        | 1.480           | 1.471      | 1.303      | 1.303       |
| 15        | 1.483           | 1.474      | 1.304      | 1.302       |
| 16        | 1.484           | 1.468      | 1.301      | 1.303       |
| 17        | 1.481           | 1.468      | 1.303      | 1.304       |
| 18        | 1.443           | 1.470      | 1.317      | 1.327       |
| 19        | 1.456           | 1.460      | 1.307      | 1.325       |
| 20        | 1.455           | 1.463      | 1.320      | 1.350       |
| 21        | 1.470           | 1.454      | 1.309      | 1.348       |
| 22        | 1.479           | 1.473      | 1.305      | 1.303       |
| 23        | 1.441           | 1.470      | 1.318      | 1.328       |
| 24        | 1.453           | 1.463      | 1.322      | 1.352       |
| 25        | 1.484           | 1.469      | 1.301      | 1.302       |
| 26        | 1.455           | 1.460      | 1.308      | 1.326       |
| 27        | 1.468           | 1.454      | 1.310      | 1.348       |
| 28        | 1.483           | 1.473      | 1.303      | 1.302       |

|           |       |       |       |       |
|-----------|-------|-------|-------|-------|
| <b>29</b> | 1.484 | 1.472 | 1.299 | 1.302 |
| <b>30</b> | 1.458 | 1.471 | 1.307 | 1.322 |
| <b>31</b> | 1.482 | 1.472 | 1.304 | 1.302 |
| <b>32</b> | 1.482 | 1.472 | 1.300 | 1.302 |
| <b>33</b> | 1.478 | 1.473 | 1.305 | 1.304 |
| <b>34</b> | 1.477 | 1.472 | 1.306 | 1.305 |
| <b>35</b> | 1.485 | 1.466 | 1.301 | 1.300 |
| <b>36</b> | 1.484 | 1.465 | 1.301 | 1.301 |
| <b>37</b> | 1.480 | 1.472 | 1.305 | 1.300 |
| <b>38</b> | 1.478 | 1.472 | 1.305 | 1.301 |
| <b>39</b> | 1.484 | 1.467 | 1.301 | 1.304 |
| <b>40</b> | 1.484 | 1.467 | 1.301 | 1.305 |
| <b>41</b> | 1.469 | 1.466 | 1.363 | 1.306 |
| <b>42</b> | 1.467 | 1.467 | 1.308 | 1.362 |
| <b>43</b> | 1.475 | 1.472 | 1.308 | 1.308 |
| <b>44</b> | 1.475 | 1.472 | 1.306 | 1.308 |
| <b>45</b> | 1.473 | 1.452 | 1.307 | 1.307 |
| <b>46</b> | 1.482 | 1.468 | 1.304 | 1.303 |
| <b>47</b> | 1.482 | 1.463 | 1.305 | 1.305 |
| <b>48</b> | 1.483 | 1.473 | 1.298 | 1.302 |
| <b>49</b> | 1.483 | 1.473 | 1.298 | 1.298 |
| <b>50</b> | 1.482 | 1.468 | 1.300 | 1.299 |
| <b>51</b> | 1.481 | 1.463 | 1.301 | 1.301 |
| <b>52</b> | 1.480 | 1.471 | 1.302 | 1.319 |
| <b>53</b> | 1.478 | 1.470 | 1.318 | 1.318 |

**Table S3.** Selected dihedral angles of ground-state optimized geometries in vacuum (PBE0-D3(BJ)/def2-SVP).

| Structure | Dihedral angle (°)    |                |                  |
|-----------|-----------------------|----------------|------------------|
|           | N(5)-C(6)-C(6')-N(5') | C(1)-C-C-C(10) | C(1')-C-C-C(10') |
| 1         | <i>n/a</i>            | 0.0            | <i>n/a</i>       |
| 2         | 128.3                 | 1.5            | 1.5              |
| 3         | 40.1                  | 2.9            | 3.8              |
| 4         | 77.2                  | 1.0            | 0.6              |
| 5         | 0.1                   | 0.0            | 0.0              |
| 6         | 0.0                   | 0.0            | 0.0              |
| 7         | 16.4                  | 7.3            | 0.7              |
| 8         | 0.0                   | 0.0            | 0.0              |
| 9         | 13.8                  | 1.1            | 1.1              |
| 10        | 3.6                   | 13.1           | 0.3              |
| 11        | 0.1                   | 0.3            | 0.0              |
| 12        | 0.1                   | 0.1            | 0.0              |
| 13        | 0.5                   | 0.7            | 0.1              |
| 14        | 7.1                   | 3.2            | 3.9              |
| 15        | 0.1                   | 0.4            | 0.0              |
| 16        | 0.5                   | 14.6           | 0.5              |
| 17        | 0.3                   | 14.3           | 0.5              |
| 18        | 0.0                   | 0.0            | 0.0              |
| 19        | 0.1                   | 13.9           | 0.4              |
| 20        | 15.7                  | 0.7            | 7.8              |
| 21        | 16.9                  | 12.7           | 6.9              |
| 22        | 0.0                   | 0.1            | 0.0              |
| 23        | 0.0                   | 0.0            | 0.0              |
| 24        | 15.6                  | 0.8            | 7.8              |
| 25        | 4.0                   | 11.7           | 0.7              |
| 26        | 2.0                   | 12.3           | 0.8              |
| 27        | 18.8                  | 11.3           | 6.4              |
| 28        | 0.0                   | 0.0            | 0.0              |

|           |     |            |            |
|-----------|-----|------------|------------|
| <b>29</b> | 1.1 | 15.9       | 0.7        |
| <b>30</b> | 0.0 | 0.0        | 0.0        |
| <b>31</b> | 0.0 | 0.0        | 0.0        |
| <b>32</b> | 0.5 | 11.4       | 0.3        |
| <b>33</b> | 0.1 | 0.4        | 0.1        |
| <b>34</b> | 0.0 | 0.3        | 0.0        |
| <b>35</b> | 1.4 | 14.8       | 15.7       |
| <b>36</b> | 1.1 | 14.9       | 11.6       |
| <b>37</b> | 1.0 | 0.3        | 16.1       |
| <b>38</b> | 0.3 | 0.0        | 11.5       |
| <b>39</b> | 0.6 | 14.6       | 0.5        |
| <b>40</b> | 0.6 | 14.6       | 0.5        |
| <b>41</b> | 7.7 | 1.2        | 0.1        |
| <b>42</b> | 7.4 | 0.0        | 1.2        |
| <b>43</b> | 0.1 | 0.0        | 0.0        |
| <b>44</b> | 0.0 | 0.1        | 0.0        |
| <b>45</b> | 0.0 | 0.0        | 0.0        |
| <b>46</b> | 0.0 | 0.0        | 0.0        |
| <b>47</b> | 0.0 | 0.0        | 0.0        |
| <b>48</b> | 0.1 | 0.0        | 0.0        |
| <b>49</b> | 0.0 | 0.0        | 0.0        |
| <b>50</b> | 0.0 | 0.0        | 0.0        |
| <b>51</b> | 0.0 | 0.0        | 0.0        |
| <b>52</b> | 0.1 | 0.0        | <i>n/a</i> |
| <b>53</b> | 0.0 | <i>n/a</i> | <i>n/a</i> |

## Optimized Coordinates

phenanthridine (**1**), S<sub>0,eq</sub> in vacuum

|   |                   |                   |                   |
|---|-------------------|-------------------|-------------------|
| C | -5.09986583926026 | -1.83074983015548 | 0.00067432251525  |
| C | -3.72100856040356 | -1.79070624143723 | -0.00042903779992 |
| C | -3.03445245365827 | -0.55757352400766 | 0.00112256447480  |
| C | -3.77448567276231 | 0.65715345530750  | 0.00385260218750  |
| C | -5.18340648130055 | 0.58656249262277  | 0.00493012095861  |
| C | -5.83484078807062 | -0.63172711492419 | 0.00337579309426  |
| C | -3.03402952880264 | 1.90095852245046  | 0.00537284355838  |
| C | -1.61897132338032 | 1.81987291593571  | 0.00403301074153  |
| C | -1.01059468681280 | 0.51865758384889  | 0.00126813149918  |
| C | -0.83980276322494 | 2.99468802117031  | 0.00540199668223  |
| H | 0.24991472287582  | 2.90597267920503  | 0.00432495476899  |
| C | -1.44593123420938 | 4.23419585526430  | 0.00805735282738  |
| C | -2.85020819179006 | 4.32126189220700  | 0.00939707581441  |
| C | -3.62945427270391 | 3.18011275953034  | 0.00808580904382  |
| H | -5.62180864923366 | -2.79042764610807 | -0.00054339906654 |
| H | -3.11467314152024 | -2.69825379359743 | -0.00251480837167 |
| H | -5.77225742447656 | 1.50534256321198  | 0.00702196133755  |
| H | -6.92682274750848 | -0.66243793474909 | 0.00425269497834  |
| H | 0.08711555540398  | 0.46293906944478  | 0.00024108678806  |
| H | -0.84260683516567 | 5.14462467961288  | 0.00911907448160  |
| H | -3.33092970164771 | 5.30242378353375  | 0.01149867646774  |
| H | -4.71602983136502 | 3.27642579356568  | 0.00917060597988  |
| N | -1.66125015098279 | -0.59861598193224 | -0.00011343296138 |

biphe (**2**), S<sub>0,eq</sub> in vacuum

|   |                  |                   |                   |
|---|------------------|-------------------|-------------------|
| N | 1.34812610907975 | -1.00732274895384 | 0.02452302163207  |
| C | 1.45422464615899 | 1.40699258773564  | 0.14573486719507  |
| C | 0.74615538826436 | 0.14155228877286  | 0.10360888145247  |
| C | 3.52987171770222 | 0.09375876311331  | -0.05797500120981 |
| C | 0.79531783997932 | 2.64764875830686  | 0.29649720718730  |

|   |                   |                   |                   |
|---|-------------------|-------------------|-------------------|
| C | 2.87262101648395  | 1.37712229739583  | 0.06666113589219  |
| C | 2.71173895645042  | -1.06546361817037 | -0.06303683414978 |
| C | 3.58061689167951  | 2.59653120850620  | 0.12622543424450  |
| H | 4.66945671144805  | 2.59423390358093  | 0.06640783770606  |
| C | 4.92688594284114  | -0.07162885149663 | -0.16293306309961 |
| H | 5.57986131931035  | 0.80233659311901  | -0.16619264706451 |
| C | 1.51344182524575  | 3.82378127645739  | 0.35873665964879  |
| H | 0.99113341847602  | 4.77572049456670  | 0.47678851517364  |
| C | 4.67291169230731  | -2.47650799008932 | -0.26476086076541 |
| H | 5.12496995879772  | -3.46767052069253 | -0.34590613495399 |
| C | 3.30387016261163  | -2.34329667315189 | -0.16585887414520 |
| H | 2.63471344798533  | -3.20564478367459 | -0.16849711917495 |
| C | 5.48819051907907  | -1.33017366245509 | -0.26450493000900 |
| H | 6.57262954382057  | -1.43399084493369 | -0.34592702408181 |
| C | 2.91527858585374  | 3.79718990757567  | 0.26758647044307  |
| H | 3.48275886771268  | 4.72975757285046  | 0.31323785733856  |
| N | -1.34522079332350 | 0.85363723228922  | -0.75341443177840 |
| C | -1.46505941919992 | -0.78853335682894 | 1.01965684859421  |
| C | -0.75011907827037 | 0.09039680261701  | 0.11367069472842  |
| C | -3.53135430328314 | -0.00191547289437 | -0.06944037668427 |
| C | -0.81444317465707 | -1.56723367734086 | 2.00271607522593  |
| C | -2.88221551231684 | -0.82928637746609 | 0.92481708875351  |
| C | -2.70735459201365 | 0.82736871048514  | -0.87342840684119 |
| C | -3.59713158445646 | -1.66312323891147 | 1.81097116715991  |
| H | -4.68512039388193 | -1.70864168126535 | 1.75314259142731  |
| C | -4.92609550774644 | 0.03618026449637  | -0.27723383887743 |
| H | -5.58358354988607 | -0.59405623188155 | 0.32334192620975  |
| C | -1.53931192771613 | -2.36832531768363 | 2.86043441155082  |
| H | -1.02329251413061 | -2.96401855191805 | 3.61660893969329  |
| C | -4.65863126228269 | 1.68558644042181  | -2.02835705469164 |
| H | -5.10465946405951 | 2.33522391928984  | -2.78490601366107 |
| C | -3.29161831891344 | 1.66618251828628  | -1.84763970565761 |
| H | -2.61795842499933 | 2.28410869432983  | -2.44410551231407 |

|   |                   |                   |                   |
|---|-------------------|-------------------|-------------------|
| C | -5.47966559245761 | 0.86222923610867  | -1.23669801341518 |
| H | -6.56249604784937 | 0.87413821733026  | -1.38074977808017 |
| C | -2.93975943777156 | -2.41977935903774 | 2.75941865812398  |
| H | -3.51263409279407 | -3.05752017111772 | 3.43684055191193  |
| H | 0.27184142969679  | -1.53858035858074 | 2.06655624230439  |
| H | -0.29179099897498 | 2.66623580090912  | 0.34898253705791  |

biphe (2), T<sub>1,eq</sub> in vacuum

|   |                   |                   |                   |
|---|-------------------|-------------------|-------------------|
| N | 1.26801757944827  | -0.82627893374636 | 0.53579782894183  |
| C | 1.41477604465125  | 1.53308357181488  | -0.07704236719271 |
| C | 0.65198401655263  | 0.35522523859457  | 0.37689444555911  |
| C | 3.45721717978390  | 0.12503629788964  | 0.07141153297232  |
| C | 0.83315958361319  | 2.78186678817410  | -0.37190075742523 |
| C | 2.82764111368823  | 1.40531349958521  | -0.20332214666043 |
| C | 2.59668972229267  | -0.95975971830950 | 0.41588398799098  |
| C | 3.58384981736309  | 2.52262508827567  | -0.60628251064056 |
| H | 4.66565873523740  | 2.43012200888721  | -0.70625429088283 |
| C | 4.83755535915579  | -0.11633969776994 | -0.01507569212739 |
| H | 5.51853090984411  | 0.69554628166538  | -0.27451066894240 |
| C | 1.59952857350357  | 3.86704873010256  | -0.76232072779787 |
| H | 1.11383874167446  | 4.82128068802449  | -0.97923351297674 |
| C | 4.51455154784573  | -2.45291259987430 | 0.54574147802867  |
| H | 4.93504479462517  | -3.44550159410182 | 0.72348816138795  |
| C | 3.15564256400383  | -2.24912374983999 | 0.63626949377123  |
| H | 2.46327047896868  | -3.05627804229494 | 0.88262005316241  |
| C | 5.36352042129950  | -1.37790059171064 | 0.22214056864320  |
| H | 6.44196292987413  | -1.53621718211109 | 0.15173791633929  |
| C | 2.98635969119972  | 3.73823644661702  | -0.88335661745327 |
| H | 3.59674836243404  | 4.58820209324226  | -1.19739223225586 |
| N | -1.52802032025565 | 1.45472908104321  | 0.41433405923582  |
| C | -1.42642611115535 | -0.83324502384765 | 1.20123981353956  |
| C | -0.73909293030436 | 0.35395535364493  | 0.68649242886899  |
| C | -3.40984019383071 | -0.00097173413795 | -0.03251505681875 |



|   |                   |                   |                   |
|---|-------------------|-------------------|-------------------|
| C | -0.83756256045413 | -1.76568621172765 | 2.06711626081727  |
| C | -2.75984307867302 | -1.04621040322718 | 0.76290947864092  |
| C | -2.75642678626339 | 1.28550618282869  | -0.05411515713527 |
| C | -3.42583705241243 | -2.21381635063948 | 1.14908734625995  |
| H | -4.44899642895677 | -2.39067745315945 | 0.81309559144036  |
| C | -4.66521345009119 | -0.11791327465309 | -0.62088109377258 |
| H | -5.17515525004252 | -1.08313450979111 | -0.62570228054298 |
| C | -1.52236524703152 | -2.91747805688817 | 2.44793532227121  |
| H | -1.04727669235961 | -3.62883416090995 | 3.12727765038375  |
| C | -4.70782787722914 | 2.25847754320646  | -1.14492445145489 |
| H | -5.22701430734344 | 3.12014174415426  | -1.57030606972457 |
| C | -3.46752734273963 | 2.41536947709192  | -0.56517521266792 |
| H | -2.97026840780145 | 3.38613845044576  | -0.52395344248780 |
| C | -5.30346587374087 | 0.98594929826051  | -1.19408499324935 |
| H | -6.28248296174086 | 0.85982803845110  | -1.66128219385652 |
| C | -2.81109364153610 | -3.15191598296912 | 1.97596993687966  |
| H | -3.35214624800008 | -4.05415026399340 | 2.26975257530425  |
| H | 0.16204127595515  | -1.57291606897596 | 2.44987493684896  |
| H | -0.24660668105232 | 2.87877970267876  | -0.27583939122177 |

[biphe-H]<sup>+</sup> (**3**), S<sub>0,eq</sub> in vacuum

|   |                  |                   |                   |
|---|------------------|-------------------|-------------------|
| N | 1.30530099183611 | -0.34506669262693 | -1.10156505393097 |
| C | 1.53290996424064 | 0.58073631489100  | 1.06382370862708  |
| C | 0.72343419280306 | 0.03937090983060  | 0.02151244321451  |
| C | 3.53088455468868 | 0.05112682451569  | -0.31601639469353 |
| C | 0.95307289566680 | 1.19770222885185  | 2.20008729103244  |
| C | 2.95387643553062 | 0.56523381292998  | 0.90819097231397  |
| C | 2.65777096356304 | -0.36724271858959 | -1.34582065959575 |
| C | 3.74031419490335 | 1.10026655011072  | 1.94681240301137  |
| H | 4.82693467087049 | 1.09271526905621  | 1.86641697726714  |
| C | 4.91519439410018 | -0.02405925324734 | -0.57325203692895 |
| H | 5.62812715301747 | 0.28112336534072  | 0.19246913252118  |
| C | 1.75255259317377 | 1.73137846729107  | 3.18452496627317  |

|   |                   |                   |                   |
|---|-------------------|-------------------|-------------------|
| H | 1.30176339587920  | 2.21381282212159  | 4.05359425965501  |
| C | 4.49549816276565  | -0.87500927280633 | -2.80262388915061 |
| H | 4.88020514328692  | -1.22909986431053 | -3.76089632285146 |
| C | 3.13394600575359  | -0.82287723460748 | -2.58554838091767 |
| H | 2.42737154548764  | -1.13593556841621 | -3.35771999223938 |
| C | 5.38677159901462  | -0.47842713235482 | -1.78955628029906 |
| H | 6.46274097340200  | -0.52816459762546 | -1.96697555906601 |
| C | 3.15278486349292  | 1.66196487272478  | 3.06339532030497  |
| H | 3.78464666377944  | 2.07685534151588  | 3.85187252571711  |
| N | -1.26198535272240 | 0.29870052549765  | -1.15037313907824 |
| C | -1.54137267488018 | -0.60874265252959 | 1.08067922069494  |
| C | -0.76031620547046 | -0.06828584356910 | -0.00423326024434 |
| C | -3.51410283679717 | -0.06157891661240 | -0.30000165374989 |
| C | -0.97459936161759 | -1.23130846824041 | 2.21758792627383  |
| C | -2.95682570554509 | -0.57781294949847 | 0.92998410672966  |
| C | -2.61170194257449 | 0.32187150976688  | -1.33194881502121 |
| C | -3.75393355897767 | -1.10112163873125 | 1.97111347666338  |
| H | -4.84022268001847 | -1.07993987081938 | 1.88445891313974  |
| C | -4.89655705480736 | 0.04383833807729  | -0.55433747658749 |
| H | -5.61786265695737 | -0.22982670585310 | 0.21609591863283  |
| C | -1.78010672867360 | -1.75058199295506 | 3.20750505278604  |
| H | -1.33277494171557 | -2.23571462812973 | 4.07725884348044  |
| C | -4.45937164480307 | 0.85204062465430  | -2.79990012170306 |
| H | -4.84072950903771 | 1.20267788100033  | -3.76100354097014 |
| C | -3.10254007251436 | 0.77070262649627  | -2.57870570540210 |
| H | -2.37558297258440 | 1.05803981881399  | -3.34014734179076 |
| C | -5.35795525239750 | 0.49129677194093  | -1.77738086772940 |
| H | -6.43336006353741 | 0.56542308873407  | -1.95255159626076 |
| C | -3.17938181091871 | -1.66604599001168 | 3.09043661126034  |
| H | -3.81555548892418 | -2.07096584881558 | 3.88030973110981  |
| H | 0.10861271639611  | -1.31953066320721 | 2.30844069901603  |
| H | -0.13158981159469 | 1.26084325070550  | 2.28318630619011  |
| H | 0.65221425341717  | -0.58448271130966 | -1.85339871770432 |

[biphe-Me]<sup>+</sup> (4), S<sub>0,eq</sub> in vacuum

|   |                   |                   |                   |
|---|-------------------|-------------------|-------------------|
| N | 1.37868679935937  | -0.74737455298329 | 0.25809972369298  |
| C | 1.36102008045775  | 1.32904888252590  | -1.00030296828201 |
| C | 0.74523338109550  | 0.20675737047790  | -0.34785054848180 |
| C | 3.49858657929832  | 0.35050944029632  | -0.27013001727870 |
| C | 0.61541813562844  | 2.32337488485021  | -1.67218748479378 |
| C | 2.77963054473898  | 1.39965530764643  | -0.96013322536384 |
| C | 2.74597363660671  | -0.70402698324508 | 0.31999203607914  |
| C | 3.40762892729517  | 2.48919638895425  | -1.60093368114644 |
| H | 4.49442352855218  | 2.57444507138357  | -1.58899815332360 |
| C | 4.90338194314363  | 0.31061957243523  | -0.15441863421754 |
| H | 5.51089348048409  | 1.10246764252265  | -0.59394026434547 |
| C | 1.25871996378583  | 3.37423082555582  | -2.29015137697913 |
| H | 0.68303314387093  | 4.14301348811133  | -2.80926679376247 |
| C | 4.77838879425028  | -1.76375104937220 | 1.09361217678132  |
| H | 5.28664140129754  | -2.57483181339826 | 1.61908694993172  |
| C | 3.40336716329406  | -1.75285960560550 | 0.99772656459027  |
| H | 2.78618601463837  | -2.53834834778918 | 1.43692080661766  |
| C | 5.52911201069775  | -0.72435543871616 | 0.51348031862574  |
| H | 6.61833922397725  | -0.73466330437018 | 0.59182308369758  |
| C | 2.66335109606763  | 3.45410666118766  | -2.24989666880371 |
| H | 3.17074772192730  | 4.28824785767302  | -2.73927484021900 |
| N | -1.33537144392410 | -0.79754336115043 | -1.11657332100573 |
| C | -1.49657474959745 | 0.83926118137672  | 0.62814792109042  |
| C | -0.74494638390969 | 0.07297814219929  | -0.30555132709834 |
| C | -3.52411003681940 | -0.29625201202309 | -0.17493328483394 |
| C | -0.84079974812804 | 1.75430794538433  | 1.48916991124337  |
| C | -2.90760515694193 | 0.68391624655972  | 0.68871046112183  |
| C | -2.71433746234202 | -1.04442860071039 | -1.06454100155309 |
| C | -3.62700415575254 | 1.47765249613828  | 1.60190421750850  |
| H | -4.71056297342923 | 1.38959183718524  | 1.67299278639577  |
| C | -4.90978906435559 | -0.55668308926039 | -0.16110157816268 |

|   |                   |                   |                   |
|---|-------------------|-------------------|-------------------|
| H | -5.55455290451062 | 0.00642364454566  | 0.51278674037954  |
| C | -1.57153205867365 | 2.51282749590127  | 2.37460664334113  |
| H | -1.06818183116093 | 3.21755787156563  | 3.03878044114803  |
| C | -4.65133144990026 | -2.26124709888553 | -1.84133906928485 |
| H | -5.08645533824512 | -3.03117733457119 | -2.48134918494842 |
| C | -3.29013725993816 | -2.02995781103845 | -1.88762631752946 |
| H | -2.67882964085935 | -2.62778084264940 | -2.55980653190204 |
| C | -5.46832128321255 | -1.51765612663008 | -0.97826164158896 |
| H | -6.54363216748743 | -1.70245858311686 | -0.94721144802818 |
| C | -2.97115144119431 | 2.37444980500418  | 2.42357174038975  |
| H | -3.54870828789502 | 2.97967477326583  | 3.12590032063957  |
| H | 0.24455533935303  | 1.85075857181325  | 1.44599810485544  |
| H | -0.47540216956835 | 2.26027513808635  | -1.69930416799677 |
| C | -0.54519356827333 | -1.53680691130276 | -2.10383612621267 |
| H | -1.01731043321988 | -1.43929921859632 | -3.08829231462530 |
| H | 0.46454433789726  | -1.12458551855750 | -2.14891365522120 |
| H | -0.48462223837840 | -2.59476093867382 | -1.81628532114063 |

[biphe-Me]<sup>+</sup> (4), S<sub>0,eq</sub> in chloroform

|   |                  |                   |                   |
|---|------------------|-------------------|-------------------|
| N | 1.39969181814598 | -0.67230841351403 | 0.41329315673288  |
| C | 1.35042733548360 | 1.23401646439066  | -1.08646837174577 |
| C | 0.75048179268499 | 0.18155741109513  | -0.31215247939692 |
| C | 3.50370535402608 | 0.38810014501562  | -0.24927165983074 |
| C | 0.58383032336249 | 2.13348563673083  | -1.85927021013917 |
| C | 2.76621334257612 | 1.33946369005393  | -1.05378914426980 |
| C | 2.76830592350834 | -0.59930348555125 | 0.46291168254224  |
| C | 3.37495364482534 | 2.36514713159253  | -1.80828512527555 |
| H | 4.46010055611411 | 2.47468080349658  | -1.80430240692047 |
| C | 4.91001399943791 | 0.38660393629825  | -0.13356155966516 |
| H | 5.50157784689865 | 1.13243884771022  | -0.66651211005472 |
| C | 1.20748508515283 | 3.12537840381784  | -2.58725808495374 |
| H | 0.61595955787774 | 3.82289379589918  | -3.18426937863466 |
| C | 4.82075879245789 | -1.52682004592447 | 1.35148906201237  |

|   |                   |                   |                   |
|---|-------------------|-------------------|-------------------|
| H | 5.34170744196164  | -2.26320488019201 | 1.96777778090713  |
| C | 3.44455514361562  | -1.54886275421874 | 1.25837298283962  |
| H | 2.84337332929519  | -2.28995882004031 | 1.78917012939419  |
| C | 5.55445584971769  | -0.55174169318832 | 0.65057553730897  |
| H | 6.64426942737725  | -0.53506688886121 | 0.72600850031932  |
| C | 2.60998624223595  | 3.23817184909229  | -2.55774691649634 |
| H | 3.10067892778343  | 4.02564788468339  | -3.13465958322540 |
| N | -1.34523654486856 | -0.75086137367127 | -1.13962109539762 |
| C | -1.47134865877545 | 0.74340334705169  | 0.73249984126561  |
| C | -0.74075836011201 | 0.04017176351059  | -0.26538379306482 |
| C | -3.52336884617957 | -0.27350656103897 | -0.16029477252715 |
| C | -0.79505005993895 | 1.58293055969098  | 1.65194046409398  |
| C | -2.88302747341056 | 0.59980616335036  | 0.79573467653353  |
| C | -2.73227915223051 | -0.94688507656330 | -1.12359879717118 |
| C | -3.58265038759895 | 1.31291776125551  | 1.78811905358616  |
| H | -4.66596179526961 | 1.22657098121501  | 1.86789260445100  |
| C | -4.91716215676301 | -0.48988195246834 | -0.17627888297352 |
| H | -5.54804396401529 | 0.01578974973073  | 0.55446471592776  |
| C | -1.50703436251860 | 2.26770095783316  | 2.61046865163488  |
| H | -0.98825941749485 | 2.91465805635577  | 3.32052541617870  |
| C | -4.70227373003112 | -1.99532469890343 | -2.04484367112430 |
| H | -5.15902215049971 | -2.66542178103179 | -2.77617681733605 |
| C | -3.33374600218174 | -1.80746104932026 | -2.06063721634590 |
| H | -2.73685560871698 | -2.33267194557836 | -2.80300316310003 |
| C | -5.49959122606883 | -1.33377742128296 | -1.09971218154466 |
| H | -6.58083658307464 | -1.48597528643887 | -1.09226188608400 |
| C | -2.90598434327654 | 2.12936458832432  | 2.67434155298021  |
| H | -3.46755254237701 | 2.67368446918888  | 3.43721714192905  |
| H | 0.29008201304678  | 1.68082746611414  | 1.60083666641532  |
| H | -0.50531603858451 | 2.04472526672541  | -1.87777614888436 |
| C | -0.56889094495051 | -1.45413639360428 | -2.16232052856031 |
| H | -0.92390268899065 | -1.15767564344736 | -3.15701989378569 |
| H | 0.48808438241683  | -1.19780217681206 | -2.06791292561979 |

H -0.68514509207426 -2.53698878857143 -2.02835081292509

[biphe-Me]<sup>+</sup> (4), S<sub>0,eq</sub> in methanol

|   |                   |                   |                   |
|---|-------------------|-------------------|-------------------|
| N | 1.39397749341305  | -0.68404127674651 | 0.39747172766182  |
| C | 1.35358304892259  | 1.23931718634984  | -1.08056197679048 |
| C | 0.74871979603823  | 0.17958918084547  | -0.32059981924295 |
| C | 3.50208858750505  | 0.38241584204978  | -0.24565564577488 |
| C | 0.58954563794740  | 2.14724107277472  | -1.84549205060421 |
| C | 2.76885327191817  | 1.34352810329738  | -1.04217480641868 |
| C | 2.76323149187881  | -0.61239113103188 | 0.45151336884030  |
| C | 3.38176204600068  | 2.37645435783672  | -1.78291781648164 |
| H | 4.46716537848262  | 2.48526263953710  | -1.77525487506247 |
| C | 4.90810363497361  | 0.37970069070128  | -0.12459400351237 |
| H | 5.50184141182242  | 1.13236930048900  | -0.64583969161066 |
| C | 1.21688688271152  | 3.14673586722211  | -2.56001283415552 |
| H | 0.62738722761034  | 3.85097336102118  | -3.15146006045692 |
| C | 4.81312109968833  | -1.55163891184558 | 1.33594188518605  |
| H | 5.33107784049889  | -2.29640093373901 | 1.94511219953397  |
| C | 3.43703601847376  | -1.57163411130962 | 1.23730835224640  |
| H | 2.83581492523762  | -2.32041764599274 | 1.75768172599213  |
| C | 5.54988219465089  | -0.56820929071381 | 0.65034273425821  |
| H | 6.63964244015667  | -0.55240824614498 | 0.73012176511410  |
| C | 2.61921954469141  | 3.25823269771423  | -2.52491720817636 |
| H | 3.11237992986093  | 4.05174280977676  | -3.09181124875681 |
| N | -1.34720462277492 | -0.75215871030068 | -1.14566006546542 |
| C | -1.47182025411239 | 0.75385926119525  | 0.71714473266831  |
| C | -0.74291610203780 | 0.04411143269736  | -0.27761623691492 |
| C | -3.52211706217955 | -0.28154006939948 | -0.15665891728224 |
| C | -0.79620971822783 | 1.60695774412377  | 1.62422775929158  |
| C | -2.88217450704783 | 0.60473298106210  | 0.78713899708611  |
| C | -2.73262660509278 | -0.95695392191226 | -1.11943052772825 |
| C | -3.58204055110435 | 1.32479432968503  | 1.77448349374095  |
| H | -4.66476874165234 | 1.23425980817622  | 1.85931144902788  |

|   |                   |                   |                   |
|---|-------------------|-------------------|-------------------|
| C | -4.91447771049515 | -0.50738595944425 | -0.16127277195387 |
| H | -5.54482639926447 | -0.00003044662006 | 0.56908281339238  |
| C | -1.50825402233204 | 2.29909676156648  | 2.57751255257623  |
| H | -0.98986247466619 | 2.95768316672694  | 3.27740393335746  |
| C | -4.69982339661468 | -2.02775407414902 | -2.01824976044404 |
| H | -5.15612727138366 | -2.70801313539361 | -2.74072215124010 |
| C | -3.33293996038993 | -1.83017922936377 | -2.04515356234585 |
| H | -2.73677148408613 | -2.35770599246536 | -2.78668910692123 |
| C | -5.49602128280401 | -1.36355954485928 | -1.07393247441139 |
| H | -6.57631651245140 | -1.52334085839630 | -1.05836978160954 |
| C | -2.90610479543074 | 2.15430731243528  | 2.64880992110026  |
| H | -3.46761438963138 | 2.70454277759609  | 3.40771703543673  |
| H | 0.28811560639362  | 1.71333233306635  | 1.56827070507043  |
| H | -0.49961226993350 | 2.05960382251313  | -1.86955671401765 |
| C | -0.57488017249978 | -1.44547944192958 | -2.17836052615656 |
| H | -0.95404427143058 | -1.15946930040488 | -3.16705101809766 |
| H | 0.47806193969363  | -1.16569845526196 | -2.10736327260747 |
| H | -0.66654287092678 | -2.52993415303497 | -2.03831822734116 |

[biphe-Me]<sup>+</sup> (**4**), S<sub>0,eq</sub> in dimethyl sulfoxide

|   |                  |                   |                   |
|---|------------------|-------------------|-------------------|
| N | 1.40205556845173 | -0.67034094253489 | 0.42697423083659  |
| C | 1.34897209495626 | 1.21776610154233  | -1.09502785341263 |
| C | 0.75098382288065 | 0.17100327243524  | -0.31154531441773 |
| C | 3.50318029849466 | 0.39258881490413  | -0.24313303582908 |
| C | 0.57872595157508 | 2.10389317323352  | -1.87883828338284 |
| C | 2.76340017743129 | 1.33243513902057  | -1.05863724549586 |
| C | 2.77058501444026 | -0.59047946848927 | 0.47722025728151  |
| C | 3.36937905081522 | 2.35467352075838  | -1.81948611356701 |
| H | 4.45393238842025 | 2.47136028187449  | -1.81237057232590 |
| C | 4.90933135473103 | 0.39932049854549  | -0.12510643548488 |
| H | 5.49757358901453 | 1.14287141446146  | -0.66520232252286 |
| C | 1.19936414531294 | 3.09302251121002  | -2.61338161857254 |
| H | 0.60536150922984 | 3.78053497666010  | -3.21957390613956 |

|   |                   |                   |                   |
|---|-------------------|-------------------|-------------------|
| C | 4.82657295971135  | -1.49941375214381 | 1.37866608653773  |
| H | 5.34952362691808  | -2.22767099307581 | 2.00311142863011  |
| C | 3.45041623201742  | -1.52860584037776 | 1.28327492240112  |
| H | 2.85280192329058  | -2.26810690933151 | 1.82067463513457  |
| C | 5.55712441596963  | -0.52805713638860 | 0.66947008731433  |
| H | 6.64684551884964  | -0.50556399207323 | 0.74633387111669  |
| C | 2.60082397638978  | 3.21571869706608  | -2.57944216943739 |
| H | 3.08836406182608  | 4.00133863424648  | -3.16172643517748 |
| N | -1.34763694144281 | -0.74825394825438 | -1.14550465352406 |
| C | -1.46579099322368 | 0.73058630872423  | 0.73933189143509  |
| C | -0.74022888429718 | 0.03127205842068  | -0.26508698549310 |
| C | -3.52189988829916 | -0.27196173444681 | -0.15810666520043 |
| C | -0.78529194093544 | 1.56350109900409  | 1.66126784445263  |
| C | -2.87720228677559 | 0.59018876338139  | 0.80457359468287  |
| C | -2.73496041938840 | -0.93730784350842 | -1.13019669053245 |
| C | -3.57327978663820 | 1.29724804456451  | 1.80388444502811  |
| H | -4.65669989113768 | 1.21290834517798  | 1.88545743611647  |
| C | -4.91649339197692 | -0.48287933500501 | -0.17333341213860 |
| H | -5.54458962673859 | 0.01625785995319  | 0.56444797349476  |
| C | -1.49371982489804 | 2.24300606762301  | 2.62623999025132  |
| H | -0.97188460388573 | 2.88560642659964  | 3.33811675645453  |
| C | -4.70972323676459 | -1.96587021284571 | -2.06119409975839 |
| H | -5.17017033032986 | -2.62444591485637 | -2.80071307310125 |
| C | -3.34059438140095 | -1.78354620844363 | -2.07732954386888 |
| H | -2.74662129971961 | -2.30055416713761 | -2.82783523724670 |
| C | -5.50293008927407 | -1.31356444714024 | -1.10616396483360 |
| H | -6.58481639724489 | -1.46182761627647 | -1.09872145754311 |
| C | -2.89254979533545 | 2.10603065773577  | 2.69377933918226  |
| H | -3.45106167558974 | 2.64618368067048  | 3.46188429212950  |
| H | 0.29969179429254  | 1.66281799311103  | 1.60742316075395  |
| H | -0.50962271870899 | 2.00645524739593  | -1.90214447609725 |
| C | -0.57618265425045 | -1.44322883969336 | -2.17715964023643 |
| H | -0.92408358707893 | -1.12320968829951 | -3.16701854113319 |



|   |                   |                   |                   |
|---|-------------------|-------------------|-------------------|
| H | 0.48387233875571  | -1.20304011689720 | -2.07411364212862 |
| H | -0.70944716843954 | -2.52616048110069 | -2.06313885463230 |

[biphe-Me]<sup>+</sup> (4), S<sub>0,eq</sub> in water

|   |                   |                   |                   |
|---|-------------------|-------------------|-------------------|
| N | 1.38487064390886  | -0.70986513416273 | 0.35678380878016  |
| C | 1.35905592466775  | 1.26660827876253  | -1.05112345139487 |
| C | 0.74627954131469  | 0.18641197294958  | -0.32794195602303 |
| C | 3.50083651137226  | 0.36376129865579  | -0.25059327390741 |
| C | 0.60195165924570  | 2.20840386304009  | -1.78140522466821 |
| C | 2.77511023186111  | 1.35605280612679  | -1.01436620643211 |
| C | 2.75541673522057  | -0.64857660155919 | 0.41274890675294  |
| C | 3.39649089136030  | 2.40523997333273  | -1.72443572400507 |
| H | 4.48281323002270  | 2.50087742633533  | -1.71878401817767 |
| C | 4.90683918578032  | 0.34914536468657  | -0.13004878483621 |
| H | 5.50420627244966  | 1.11629879087151  | -0.62472486682521 |
| C | 1.23715251075436  | 3.22413292785563  | -2.46522121464446 |
| H | 0.65282797921047  | 3.95394215095263  | -3.02934215295036 |
| C | 4.80059248664425  | -1.62929056731204 | 1.26365675992315  |
| H | 5.31336820733034  | -2.39720764179777 | 1.84712826819864  |
| C | 3.42444663918941  | -1.63750959672584 | 1.16476140429819  |
| H | 2.82139993645118  | -2.40055956785225 | 1.66061877435303  |
| C | 5.54347600446223  | -0.62777898117069 | 0.61205163140726  |
| H | 6.63283335765251  | -0.62066346762124 | 0.69255466729028  |
| C | 2.64077420127891  | 3.31868291243638  | -2.43415279558083 |
| H | 3.14004714206874  | 4.12408662139949  | -2.97758730363147 |
| N | -1.34504267655357 | -0.76002197599492 | -1.14291302306078 |
| C | -1.48147380526726 | 0.78812379174906  | 0.68393044286446  |
| C | -0.74594390951235 | 0.05942257479398  | -0.29223884495562 |
| C | -3.52174729820038 | -0.29366314213124 | -0.15652874188729 |
| C | -0.81512758354303 | 1.67301216851918  | 1.56709849648331  |
| C | -2.89038329677825 | 0.62850879729886  | 0.75774394899365  |
| C | -2.72725288186638 | -0.98589866538771 | -1.10234669465999 |
| C | -3.59818145840298 | 1.37080498506999  | 1.72261315143862  |

|   |                   |                   |                   |
|---|-------------------|-------------------|-------------------|
| H | -4.67987589031261 | 1.27216586481714  | 1.80818939220883  |
| C | -4.91056731629559 | -0.53954335636924 | -0.14690887905966 |
| H | -5.54410760473787 | -0.01810176487497 | 0.57026196819397  |
| C | -1.53460347364719 | 2.38701892404814  | 2.49833008123625  |
| H | -1.02309420428703 | 3.07060006850017  | 3.17836189928884  |
| C | -4.68098972969242 | -2.11751043714427 | -1.95341338742330 |
| H | -5.12969203409672 | -2.82979244320022 | -2.64862482041830 |
| C | -3.31765773724597 | -1.89938870890103 | -1.99470059633795 |
| H | -2.71589035244722 | -2.44412922807580 | -2.71880741189252 |
| C | -5.48317104900322 | -1.43348871066807 | -1.02837779972027 |
| H | -6.56041206895692 | -1.60882274599249 | -1.00231689852031 |
| C | -2.93121825119587 | 2.23218792398025  | 2.57245118224124  |
| H | -3.49837498451076 | 2.79968778954967  | 3.31361279498315  |
| H | 0.26784010119464  | 1.78877617211787  | 1.50864159495871  |
| H | -0.48795778618183 | 2.13580538940792  | -1.80085036155905 |
| C | -0.57140237718416 | -1.45091831033846 | -2.17718110405831 |
| H | -1.00170715927626 | -1.22356514862013 | -3.15918215765623 |
| H | 0.46401350699877  | -1.10627542092264 | -2.15979034578053 |
| H | -0.59536797124385 | -2.53268722043439 | -1.99673113382766 |

pBiphe (5),  $S_{0,eq}$  in vacuum

|   |                  |                  |                   |
|---|------------------|------------------|-------------------|
| N | 1.34633039888446 | 0.03424427681131 | -1.39783241965039 |
| C | 1.44199078301986 | 0.03880446814936 | 1.01611343991712  |
| C | 0.74116253077270 | 0.01933645481384 | -0.24510912787526 |
| C | 3.52422578931314 | 0.09377813159908 | -0.28957550349980 |
| C | 0.73622705921968 | 0.02029448445757 | 2.25110564778107  |
| C | 2.86089852858683 | 0.07714068973494 | 0.99470312183451  |
| C | 2.70446577335009 | 0.07035557842047 | -1.45093208530352 |
| C | 3.56021497256317 | 0.09714623952920 | 2.21740782628740  |
| H | 4.64989610463856 | 0.12658984907572 | 2.22462229369317  |
| C | 4.92465020868766 | 0.13134574000927 | -0.45354503923198 |
| H | 5.57645630880389 | 0.14999498328281 | 0.42120744612041  |
| C | 1.47308447019091 | 0.04154057311956 | 3.43175715390889  |

|   |                   |                   |                   |
|---|-------------------|-------------------|-------------------|
| H | 0.96788827532927  | 0.02882892613209  | 4.39732246314200  |
| C | 4.67763643587498  | 0.12154665246678  | -2.86226166511311 |
| H | 5.13561148976165  | 0.13254299861096  | -3.85399454832453 |
| C | 3.30658170944513  | 0.08487047629620  | -2.73123121339309 |
| H | 2.63799346548387  | 0.06585199380105  | -3.59355221232234 |
| C | 5.49111416057448  | 0.14496560409511  | -1.71343443318993 |
| H | 6.57814023471257  | 0.17410535294332  | -1.81769163743918 |
| C | 2.87120746320897  | 0.07963126837495  | 3.41333705200421  |
| H | 3.41954847726536  | 0.09547212906875  | 4.35789635795566  |
| N | -1.34645043089505 | -0.03435369329624 | -1.39772698794851 |
| C | -1.44192272064364 | -0.03887925673647 | 1.01622645271370  |
| C | -0.74119273370737 | -0.01942932991124 | -0.24505107889364 |
| C | -3.52425954534297 | -0.09387053942890 | -0.28929952346764 |
| C | -0.73606279897918 | -0.02035209339121 | 2.25116335511126  |
| C | -2.86083212068419 | -0.07721552868556 | 0.99492712439763  |
| C | -2.70458995144862 | -0.07046510654081 | -1.45072032323162 |
| C | -3.56005339894894 | -0.09720427531602 | 2.21768655500368  |
| H | -4.64973397019901 | -0.12664795389459 | 2.22498654892397  |
| C | -4.92469676171494 | -0.13143908377039 | -0.45315940380536 |
| H | -5.57643507408082 | -0.15007501096967 | 0.42164388470402  |
| C | -1.47282821344002 | -0.04158183258364 | 3.43187257954631  |
| H | -0.96755746385786 | -0.02885689639350 | 4.39739866397815  |
| C | -4.67787080977981 | -0.12167473696969 | -2.86189532210493 |
| H | -5.13592248742947 | -0.13268480942462 | -3.85359266109266 |
| C | -3.30680575045698 | -0.08499788717085 | -2.73097218221299 |
| H | -2.63828554888569 | -0.06599226183137 | -3.59334619299558 |
| C | -5.49125897156191 | -0.14507640921517 | -1.71300452353075 |
| H | -6.57829327642283 | -0.17421645976316 | -1.81717589584623 |
| C | -2.87095268580140 | -0.07967285174930 | 3.41356183305006  |
| H | -3.41921992540655 | -0.09550085374993 | 4.35816418039986  |

pBiphe (**5**), S<sub>0,eq</sub> in chloroform

|   |                  |                  |                   |
|---|------------------|------------------|-------------------|
| N | 1.34698867466540 | 0.03271043991109 | -1.39764727905135 |
|---|------------------|------------------|-------------------|

|   |                   |                   |                   |
|---|-------------------|-------------------|-------------------|
| C | 1.44184033901899  | 0.04173174216878  | 1.01634018229345  |
| C | 0.74120114746871  | 0.01908652427384  | -0.24326449290966 |
| C | 3.52467416537097  | 0.09378195683089  | -0.29056733845452 |
| C | 0.73616346852488  | 0.02544829829962  | 2.25208917143541  |
| C | 2.86112453030487  | 0.08341419093493  | 0.99430545841164  |
| C | 2.70681944365584  | 0.06679671125990  | -1.45343275754953 |
| C | 3.56262799713554  | 0.11320052682188  | 2.21602884434176  |
| H | 4.65250466080210  | 0.14587265711179  | 2.22266366626134  |
| C | 4.92619427338721  | 0.12797839756969  | -0.45108938045430 |
| H | 5.57519480910841  | 0.14843809922881  | 0.42576870702616  |
| C | 1.47337407925433  | 0.05986155129879  | 3.43278178715802  |
| H | 0.97023289087415  | 0.05494623564745  | 4.39969801538350  |
| C | 4.68276249596806  | 0.10833363564620  | -2.86176082504893 |
| H | 5.14231170731705  | 0.11397236732764  | -3.85311940048396 |
| C | 3.31053863528359  | 0.07507790629567  | -2.73332042618589 |
| H | 2.65012011610155  | 0.05374107653737  | -3.60279808336850 |
| C | 5.49434510416276  | 0.13481026666473  | -1.71108979468826 |
| H | 6.58189925703712  | 0.16070347305913  | -1.81376987814339 |
| C | 2.87216565296894  | 0.10318608222810  | 3.41194201833949  |
| H | 3.42041697327144  | 0.12904105251270  | 4.35654815537408  |
| N | -1.34710937877240 | -0.03281974483020 | -1.39754081743898 |
| C | -1.44177259640698 | -0.04180717251308 | 1.01645382699341  |
| C | -0.74123157226364 | -0.01918004931371 | -0.24320582434327 |
| C | -3.52470845862217 | -0.09387518970724 | -0.29029069683540 |
| C | -0.73599926009513 | -0.02550619295981 | 2.25214745415920  |
| C | -2.86105859105318 | -0.08348966113542 | 0.99453023207431  |
| C | -2.70694430696076 | -0.06690624672386 | -1.45322009940612 |
| C | -3.56246666046917 | -0.11325834355311 | 2.21630885030419  |
| H | -4.65234282252569 | -0.14592982757040 | 2.22302981614992  |
| C | -4.92624102271030 | -0.12807328454815 | -0.45070387188383 |
| H | -5.57517414516866 | -0.14852089099370 | 0.42620429454873  |
| C | -1.47311763274311 | -0.05990243263462 | 3.43289827307910  |
| H | -0.96990135530421 | -0.05497352206197 | 4.39977550936917  |

|   |                   |                   |                   |
|---|-------------------|-------------------|-------------------|
| C | -4.68299626348730 | -0.10846107603945 | -2.86139463472741 |
| H | -5.14262237514961 | -0.11411282110937 | -3.85271750739605 |
| C | -3.31076249792606 | -0.07520431925881 | -2.73306094462105 |
| H | -2.65041080904594 | -0.05387937874429 | -3.60258962905472 |
| C | -5.49448948921726 | -0.13492184888877 | -1.71066021993806 |
| H | -6.58205160231793 | -0.16081588360695 | -1.81325561453358 |
| C | -2.87191087624792 | -0.10322698711006 | 3.41216801880591  |
| H | -3.42008870519452 | -0.12906831832604 | 4.35681723500802  |

pBiphe (**5**), S<sub>0,eq</sub> in methanol

|   |                   |                   |                   |
|---|-------------------|-------------------|-------------------|
| N | 1.34782206567851  | 0.03038661573929  | -1.39956025493099 |
| C | 1.44134602881764  | 0.04315739437042  | 1.01472938651208  |
| C | 0.74117384325191  | 0.01851828408648  | -0.24438277993792 |
| C | 3.52487047876274  | 0.09372749322464  | -0.29091122762864 |
| C | 0.73578970859872  | 0.02802616331906  | 2.25056396276992  |
| C | 2.86064911032228  | 0.08665823748397  | 0.99328903668937  |
| C | 2.70864141816489  | 0.06379672453328  | -1.45454960917768 |
| C | 3.56238348579423  | 0.12143989403513  | 2.21463114396375  |
| H | 4.65238632977351  | 0.15581036668373  | 2.22227748681557  |
| C | 4.92675719970485  | 0.12716869387957  | -0.44855043227595 |
| H | 5.57432451118938  | 0.14965241745256  | 0.42947034742375  |
| C | 1.47239651028287  | 0.06878039840503  | 3.43136572208417  |
| H | 0.96993901260948  | 0.06723217222304  | 4.39883289385855  |
| C | 4.68736573642229  | 0.10095271434887  | -2.85949737902819 |
| H | 5.14849119405021  | 0.10365245919542  | -3.85034584614445 |
| C | 3.31475793475206  | 0.06849129263267  | -2.73329703021906 |
| H | 2.65930039395983  | 0.04504113744939  | -3.60682910827813 |
| C | 5.49709984564027  | 0.13031196222958  | -1.70761607257588 |
| H | 6.58498922700250  | 0.15544434895432  | -1.80855206114676 |
| C | 2.87122783723828  | 0.11491322252208  | 3.41022842202806  |
| H | 3.41917945834629  | 0.14565431253395  | 4.35500730681742  |
| N | -1.34794305786642 | -0.03049596489947 | -1.39945344780160 |
| C | -1.44127850255446 | -0.04323243955656 | 1.01484319079888  |

|   |                   |                   |                   |
|---|-------------------|-------------------|-------------------|
| C | -0.74120444337676 | -0.01861137740885 | -0.24432395219287 |
| C | -3.52490495001405 | -0.09382035024110 | -0.29063441265903 |
| C | -0.73562564911270 | -0.02808369090530 | 2.25062235673821  |
| C | -2.86058339557011 | -0.08673336339454 | 0.99351402807247  |
| C | -2.70876644432690 | -0.06390628305134 | -1.45433663692663 |
| C | -3.56222234311217 | -0.12149784921318 | 2.21491150891917  |
| H | -4.65222458739594 | -0.15586808722024 | 2.22264428480325  |
| C | -4.92680390079823 | -0.12726290204772 | -0.44816495095026 |
| H | -5.57430386726672 | -0.14973403179239 | 0.42990568331313  |
| C | -1.47214015126563 | -0.06882134035600 | 3.43148240384117  |
| H | -0.96960750079870 | -0.06725987875906 | 4.39891068981344  |
| C | -4.68759913355462 | -0.10108046322692 | -2.85913099861472 |
| H | -5.14880134535207 | -0.10379357947619 | -3.84994372195878 |
| C | -3.31498163599975 | -0.06861808164000 | -2.73303719441747 |
| H | -2.65959098892051 | -0.04518023547920 | -3.60661976560267 |
| C | -5.49724391413443 | -0.13042325352581 | -1.70718651333144 |
| H | -6.58514109239959 | -0.15555629786810 | -1.80803797262583 |
| C | -2.87097318426724 | -0.11495445091279 | 3.41045474578294  |
| H | -3.41885124227576 | -0.14568238432771 | 4.35527676737969  |

pBiphe (**5**),  $S_{0,eq}$  in dimethyl sulfoxide

|   |                  |                  |                   |
|---|------------------|------------------|-------------------|
| N | 1.34732898742450 | 0.03067889019812 | -1.39877827980886 |
| C | 1.44158543929062 | 0.04305633278183 | 1.01558786619336  |
| C | 0.74133723381106 | 0.01858807342870 | -0.24360799587432 |
| C | 3.52460671507997 | 0.09371922763243 | -0.29078483869400 |
| C | 0.73585486022629 | 0.02787242465568 | 2.25129301577015  |
| C | 2.86083273279388 | 0.08642550079172 | 0.99371572262283  |
| C | 2.70783287307425 | 0.06409620350048 | -1.45441072045188 |
| C | 3.56272043873802 | 0.12088111965481 | 2.21495558103279  |
| H | 4.65266962673678 | 0.15508541329266 | 2.22203939904254  |
| C | 4.92633533969629 | 0.12711636844932 | -0.44923426795894 |
| H | 5.57400948847359 | 0.14937283856621 | 0.42863418007144  |
| C | 1.47265631657565 | 0.06830360286965 | 3.43196952967412  |

|   |                   |                   |                   |
|---|-------------------|-------------------|-------------------|
| H | 0.97007085256220  | 0.06662486866850  | 4.39929983078444  |
| C | 4.68569063173231  | 0.10146486616603  | -2.86035083014206 |
| H | 5.14653966405741  | 0.10437000900201  | -3.85118032412178 |
| C | 3.31313819534400  | 0.06904982823645  | -2.73366613351233 |
| H | 2.65623130975537  | 0.04580923978168  | -3.60604067989702 |
| C | 5.49585246664361  | 0.13050836706597  | -1.70871206283540 |
| H | 6.58355259082991  | 0.15559794965282  | -1.81022868811870 |
| C | 2.87154061395256  | 0.11420800095942  | 3.41057966445044  |
| H | 3.41946796921283  | 0.14466348754483  | 4.35522431944565  |
| N | -1.34744992353275 | -0.03078800626000 | -1.39867151685485 |
| C | -1.44151783832287 | -0.04313131049635 | 1.01570171046736  |
| C | -0.74136777798460 | -0.01868100938821 | -0.24354915231488 |
| C | -3.52464116166670 | -0.09381214300461 | -0.29050805512582 |
| C | -0.73569074621451 | -0.02792988051660 | 2.25135143910774  |
| C | -2.86076697387392 | -0.08650065263914 | 0.99394072743845  |
| C | -2.70795789665399 | -0.06420562998194 | -1.45419781307215 |
| C | -3.56255926566919 | -0.12093912854107 | 2.21523595553269  |
| H | -4.65250789484298 | -0.15514324641141 | 2.22240618595436  |
| C | -4.92638206289335 | -0.12721079116867 | -0.44884883609019 |
| H | -5.57398889461492 | -0.14945483015414 | 0.42906943607906  |
| C | -1.47239990840391 | -0.06834444556671 | 3.43208626424461  |
| H | -0.96973933419838 | -0.06665239292107 | 4.39937769839695  |
| C | -4.68592409934108 | -0.10159263423689 | -2.85998455725109 |
| H | -5.14684990025844 | -0.10451113273816 | -3.85077830172871 |
| C | -3.31336193739804 | -0.06917649236238 | -2.73340641154373 |
| H | -2.65652185139467 | -0.04594805981115 | -3.60583154341284 |
| C | -5.49599661055914 | -0.13061984221391 | -1.70828259597010 |
| H | -6.58370459096128 | -0.15571024003165 | -1.80971470899343 |
| C | -2.87128593221989 | -0.11424921276897 | 3.41080600625291  |
| H | -3.41913974500650 | -0.14469153168631 | 4.35549378121124  |

pBiphe (5),  $S_{0,eq}$  in water

|   |                  |                  |                   |
|---|------------------|------------------|-------------------|
| N | 1.35011863486922 | 0.02921306823600 | -1.40356763199556 |
|---|------------------|------------------|-------------------|

|   |                   |                   |                   |
|---|-------------------|-------------------|-------------------|
| C | 1.44041410059974  | 0.04367644211785  | 1.01081158643236  |
| C | 0.74112329615220  | 0.01826686299409  | -0.24865535574841 |
| C | 3.52554394578308  | 0.09383003975744  | -0.29122177066228 |
| C | 0.73537924997115  | 0.02882706327762  | 2.24670515597861  |
| C | 2.85954956666198  | 0.08780148633802  | 0.99147234151349  |
| C | 2.71185262420489  | 0.06253158423932  | -1.45582343237839 |
| C | 3.56084035898641  | 0.12409731330914  | 2.21291692576289  |
| H | 4.65056212698912  | 0.15898046917719  | 2.21976677084938  |
| C | 4.92785446288575  | 0.12741376546920  | -0.44434909652837 |
| H | 5.57144053077515  | 0.15094836849515  | 0.43619660501679  |
| C | 1.47081019245763  | 0.07132246333584  | 3.42804237175585  |
| H | 0.96664911771436  | 0.07039017201499  | 4.39432815318995  |
| C | 4.69510022224775  | 0.09844354995041  | -2.85498350583516 |
| H | 5.15819615478850  | 0.10007435175196  | -3.84443366457946 |
| C | 3.32217853173471  | 0.06591244432369  | -2.73235866347283 |
| H | 2.67180601475099  | 0.04145860046305  | -3.60902186871262 |
| C | 5.50212687063039  | 0.12926846696840  | -1.70139111719478 |
| H | 6.58983376196623  | 0.15446523050463  | -1.79940701509319 |
| C | 2.86948771126540  | 0.11844891879202  | 3.40826800622428  |
| H | 3.41654574551243  | 0.15054349638476  | 4.35300809497503  |
| N | -1.35023987896061 | -0.02932287978892 | -1.40346078757084 |
| C | -1.44034683409496 | -0.04375165040141 | 1.01092528515131  |
| C | -0.74115421617332 | -0.01836029336752 | -0.24859660885649 |
| C | -3.52557834505290 | -0.09392281974464 | -0.29094500859164 |
| C | -0.73521547264229 | -0.02888471977918 | 2.24676350452856  |
| C | -2.85948392896712 | -0.08787667009560 | 0.99169717531327  |
| C | -2.71197771034041 | -0.06264146231195 | -1.45561035933507 |
| C | -3.56067934510079 | -0.12415545443439 | 2.21319709840453  |
| H | -4.65040057380629 | -0.15903859800813 | 2.22013332783133  |
| C | -4.92790072401043 | -0.12750733609212 | -0.44396352556116 |
| H | -5.57141912105400 | -0.15102876634776 | 0.43663182247990  |
| C | -1.47055410483326 | -0.07136347540815 | 3.42815892016031  |
| H | -0.96631803911206 | -0.07041786352318 | 4.39440573594461  |



|   |                   |                   |                   |
|---|-------------------|-------------------|-------------------|
| C | -4.69533336376289 | -0.09857126431952 | -2.85461654332247 |
| H | -5.15850603256708 | -0.10021549194683 | -3.84403077887509 |
| C | -3.32240222893933 | -0.06603962809562 | -2.73209836316550 |
| H | -2.67209692856480 | -0.04159842322510 | -3.60881174392562 |
| C | -5.50227047029486 | -0.12937913247170 | -1.70096110523360 |
| H | -6.58998495793859 | -0.15457610435850 | -1.79889238772639 |
| C | -2.86923322109900 | -0.11849030267188 | 3.40849414758355  |
| H | -3.41621772363214 | -0.15057182150864 | 4.35327730526896  |

pBiphe (**5**),  $T_{1,eq}$  in vacuum

|   |                   |                   |                   |
|---|-------------------|-------------------|-------------------|
| N | 1.34002165131729  | 0.03552526027873  | -1.42766600931970 |
| C | 1.41777025568843  | 0.03768177813282  | 1.02116244756674  |
| C | 0.71053013498913  | 0.01883747096841  | -0.21964286957966 |
| C | 3.50448741754580  | 0.09313241810557  | -0.29085411341785 |
| C | 0.71749387778796  | 0.01908612527413  | 2.26362024591503  |
| C | 2.84445402550560  | 0.07563907661401  | 1.00113126013909  |
| C | 2.66935941447643  | 0.07086697643130  | -1.46354087060969 |
| C | 3.53887486431576  | 0.09418728295917  | 2.21126968987394  |
| H | 4.62889511783725  | 0.12319883625640  | 2.21699414109469  |
| C | 4.89731936711153  | 0.13016998572559  | -0.45881489147357 |
| H | 5.55094405928851  | 0.14759374186136  | 0.41486690602611  |
| C | 1.47619285440268  | 0.03936997386219  | 3.46513258872758  |
| H | 0.96972712646182  | 0.02599016180844  | 4.42958053695967  |
| C | 4.65801122756488  | 0.12367890235433  | -2.87640589211537 |
| H | 5.12071181977019  | 0.13593329634999  | -3.86595541995257 |
| C | 3.29118938387295  | 0.08733610721237  | -2.75121439800053 |
| H | 2.62393293290072  | 0.06954990615017  | -3.61452890689640 |
| C | 5.46984254626904  | 0.14533131520169  | -1.72166379274223 |
| H | 6.55715945541151  | 0.17424394701800  | -1.82161036864741 |
| C | 2.85192913170776  | 0.07600030755624  | 3.43481318611548  |
| H | 3.41632010983037  | 0.09110566343983  | 4.36965382622233  |
| N | -1.34014414274584 | -0.03563353001480 | -1.42756105614055 |
| C | -1.41770193704294 | -0.03775610495570 | 1.02127347896138  |

|   |                   |                   |                   |
|---|-------------------|-------------------|-------------------|
| C | -0.71055845910975 | -0.01892899756761 | -0.21958721552382 |
| C | -3.50452129102342 | -0.09322517623667 | -0.29057961134191 |
| C | -0.71732881126180 | -0.01914317877097 | 2.26367646424157  |
| C | -2.84438724982621 | -0.07571387269214 | 1.00135402414142  |
| C | -2.66948467443172 | -0.07097583926409 | -1.46333175881504 |
| C | -3.53871381456213 | -0.09424541310818 | 2.21154678720131  |
| H | -4.62873360657072 | -0.12325698983649 | 2.21735660869591  |
| C | -4.89736633453318 | -0.13026505004524 | -0.45843139303575 |
| H | -5.55092297419771 | -0.14767676355796 | 0.41530154403593  |
| C | -1.47593413781270 | -0.03941040774642 | 3.46524820300330  |
| H | -0.96939317120815 | -0.02601717416957 | 4.42965644744157  |
| C | -4.65824661827107 | -0.12380722918936 | -2.87604107572666 |
| H | -5.12102431392847 | -0.13607519429508 | -3.86555437269765 |
| C | -3.29141503922222 | -0.08746269665245 | -2.75095657814907 |
| H | -2.62422589299626 | -0.06968831804720 | -3.61432333716853 |
| C | -5.46998793782872 | -0.14544375322070 | -1.72123542898481 |
| H | -6.55731263575029 | -0.17435771416429 | -1.82109684993850 |
| C | -2.85167278518910 | -0.07604134560856 | 3.43503650064630  |
| H | -3.41599094654326 | -0.09113378441729 | 4.36992132326792  |

pBiphe (5), S<sub>1,eq</sub> in vacuum

|   |                  |                   |                   |
|---|------------------|-------------------|-------------------|
| N | 1.31783443252294 | 0.03713429475398  | -1.39656255922346 |
| C | 1.44681109613179 | 0.00924371146092  | 1.04992669592796  |
| C | 0.74349468562093 | 0.00652607024181  | -0.19684785152947 |
| C | 3.50338728445299 | 0.08118140928309  | -0.29927808361146 |
| C | 0.74449149446507 | -0.02530532880542 | 2.28890641388765  |
| C | 2.86643188852703 | 0.04758725160358  | 1.00699942179077  |
| C | 2.66704309672843 | 0.07376499478670  | -1.46025970904146 |
| C | 3.57118738823352 | 0.05091308514886  | 2.21986123487898  |
| H | 4.66110000956080 | 0.07993544418229  | 2.22134645159760  |
| C | 4.89860879218043 | 0.12051998245274  | -0.47684723819583 |
| H | 5.55350278137918 | 0.12683659562305  | 0.39612632509227  |
| C | 1.49879162455743 | -0.02018989665877 | 3.46942461635915  |

|   |                   |                   |                   |
|---|-------------------|-------------------|-------------------|
| H | 1.00141321503849  | -0.04570543451309 | 4.43935779071640  |
| C | 4.64208334276877  | 0.14429562138113  | -2.88017356200353 |
| H | 5.09137141046909  | 0.16888719165757  | -3.87596377572932 |
| C | 3.27187515367594  | 0.10617942939144  | -2.74319596840831 |
| H | 2.60456166841402  | 0.09947615985969  | -3.60674909125578 |
| C | 5.46502490440198  | 0.15162370895940  | -1.73901485311551 |
| H | 6.55134342637443  | 0.18184856968524  | -1.84732428532142 |
| C | 2.88944051979703  | 0.01737024915749  | 3.43059919373165  |
| H | 3.45209664260704  | 0.02049488829694  | 4.36685508598296  |
| N | -1.39254548543073 | -0.03603394608442 | -1.27412806078038 |
| C | -1.42751807319621 | -0.06721006096754 | 1.05709914504888  |
| C | -0.67664471332894 | -0.03143189524419 | -0.16723394963176 |
| C | -3.51574003001019 | -0.10524014723188 | -0.30405539021438 |
| C | -0.71546070310196 | -0.06430129975042 | 2.29029610673440  |
| C | -2.85086010178126 | -0.10439105407217 | 0.99722122432348  |
| C | -2.69576185679856 | -0.06803534564744 | -1.49014270033773 |
| C | -3.55384950974558 | -0.13887366945190 | 2.20650676661458  |
| H | -4.64354037650146 | -0.16789562778246 | 2.20762893219537  |
| C | -4.90223622126033 | -0.13977964823689 | -0.49364548531175 |
| H | -5.54866191031955 | -0.16832628765883 | 0.38543142730275  |
| C | -1.48163919962442 | -0.10014996570662 | 3.46518862796499  |
| H | -0.98545746417322 | -0.09972902638924 | 4.43581194865599  |
| C | -4.65945317902252 | -0.10234049635498 | -2.89259029501589 |
| H | -5.10835795851220 | -0.10147004421546 | -3.88860351432056 |
| C | -3.28430075287386 | -0.06714412397967 | -2.77497538145411 |
| H | -2.63057041025338 | -0.03844807582925 | -3.64663439447913 |
| C | -5.47907332736003 | -0.13888296679009 | -1.75585693140538 |
| H | -6.56476105400903 | -0.16651500685696 | -1.85977490401776 |
| C | -2.86912586078608 | -0.13651060528130 | 3.41967451742029  |
| H | -3.43482791681780 | -0.16383240041696 | 4.35366384617828  |

[pBiphe-H]<sup>+</sup> (**6**), S<sub>0,eq</sub> in vacuum

|   |                   |                   |                   |
|---|-------------------|-------------------|-------------------|
| C | -6.14199581097694 | -3.88483236850987 | -0.06145469667359 |
|---|-------------------|-------------------|-------------------|

|   |                   |                   |                   |
|---|-------------------|-------------------|-------------------|
| C | -4.76821095209425 | -3.75016309890246 | -0.06289867016679 |
| C | -4.20555267791102 | -2.46430617789390 | -0.06178662839215 |
| C | -5.01003252064717 | -1.29771373763685 | -0.05919902871318 |
| C | -6.40745124866679 | -1.47803510871893 | -0.05778884071020 |
| C | -6.96255655959122 | -2.74367911375289 | -0.05889766861633 |
| C | -4.36376697475712 | 0.00188058955172  | -0.05816649017932 |
| C | -2.93917126761885 | 0.06183069039776  | -0.05982393225171 |
| C | -2.21255730359141 | -1.15064718339887 | -0.06238998131179 |
| C | -2.22945587284998 | 1.30027952311082  | -0.05898581952628 |
| C | -2.98759256104033 | 2.46597558903361  | -0.05643017799078 |
| C | -4.38652212781119 | 2.41625588575704  | -0.05477357300564 |
| C | -5.07230939107562 | 1.21318895947981  | -0.05561139050787 |
| H | -6.59027389459514 | -4.88021109439426 | -0.06230905870612 |
| H | -4.11594670722527 | -4.62634018459312 | -0.06489439932854 |
| H | -7.06605249617896 | -0.60960780664874 | -0.05580150487521 |
| H | -8.04814876138918 | -2.85773461419479 | -0.05777426315145 |
| H | -2.50221765791224 | 3.44159671531019  | -0.05567421021188 |
| H | -4.94906794463038 | 3.35237763053817  | -0.05277772059323 |
| H | -6.16173271635451 | 1.21894006012438  | -0.05426976944412 |
| C | -0.75712484405468 | -1.17622133053804 | -0.06421911072794 |
| C | -0.05469161216436 | 0.06551203093586  | -0.06339111805255 |
| C | 1.15593003257781  | -2.44961371184581 | -0.06837472133863 |
| C | 1.36128468534235  | 0.01142454361815  | -0.06524287467726 |
| C | -0.75823041517846 | 1.30084068157637  | -0.06081842677985 |
| C | 1.73512996322469  | -3.74141139721599 | -0.07089203349779 |
| C | 1.99223098804243  | -1.28811859000354 | -0.06783353613184 |
| C | 2.07376457023810  | 1.22911850658798  | -0.06446381813243 |
| C | -0.00781854847497 | 2.47154252803442  | -0.06016233370962 |
| C | 3.10264728508840  | -3.88818111178504 | -0.07283847059247 |
| H | 1.06337918740515  | -4.60122556026286 | -0.07122584951676 |
| C | 3.38864522455583  | -1.47697175834750 | -0.06987817039487 |
| C | 1.39398792666843  | 2.43095172303199  | -0.06197211070405 |
| H | 3.16368789417577  | 1.23049061663799  | -0.06582394469070 |

|   |                   |                   |                   |
|---|-------------------|-------------------|-------------------|
| H | -0.49778598078283 | 3.44538743738909  | -0.05822576104493 |
| C | 3.93092585228969  | -2.74731550504849 | -0.07232406957205 |
| H | 3.54969616181269  | -4.88423717495399 | -0.07478471218360 |
| H | 4.05699855662358  | -0.61554761049799 | -0.06954776226282 |
| H | 1.95331585413593  | 3.36854552792490  | -0.06139267098220 |
| H | 5.01621026933941  | -2.86897171905744 | -0.07388050149008 |
| N | -2.84009416224145 | -2.31446242470335 | -0.06323325903669 |
| N | -0.19678089161783 | -2.35755617851326 | -0.06654589652578 |
| H | -2.20939255008803 | -3.12503467762224 | -0.06512102359889 |

[pBiphe-H]<sup>+</sup> (6), S<sub>0,eq</sub> in chloroform

|   |                   |                   |                   |
|---|-------------------|-------------------|-------------------|
| C | -6.14499884441382 | -3.88095331103489 | -0.06320667043038 |
| C | -4.77121521934421 | -3.74893387075737 | -0.06477039710298 |
| C | -4.20984199257627 | -2.46167903693972 | -0.06282197105572 |
| C | -5.01315213554028 | -1.29498108301772 | -0.05926087905780 |
| C | -6.41156429956612 | -1.47178245415770 | -0.05773857308521 |
| C | -6.96529243484633 | -2.73826096979572 | -0.05968189326385 |
| C | -4.36394259190536 | 0.00170260097218  | -0.05743931254850 |
| C | -2.93976913168523 | 0.05801395992497  | -0.05967879150107 |
| C | -2.21561233035914 | -1.15727054971051 | -0.06287998112403 |
| C | -2.23101925974527 | 1.29638496000848  | -0.05844933613684 |
| C | -2.98691319024322 | 2.46342871812417  | -0.05405236200296 |
| C | -4.38674424395765 | 2.41504777909200  | -0.05167772671531 |
| C | -5.07364741892300 | 1.21351015410707  | -0.05348633401137 |
| H | -6.59483235410201 | -4.87606490036278 | -0.06471481342052 |
| H | -4.11248246175814 | -4.62021366785782 | -0.06750060375731 |
| H | -7.06721286677881 | -0.60073171732101 | -0.05505049352004 |
| H | -8.05138142034575 | -2.85196994609171 | -0.05848356362571 |
| H | -2.50109059575598 | 3.43906574715751  | -0.05221642661586 |
| H | -4.94765196106480 | 3.35235703454314  | -0.04832178732276 |
| H | -6.16346033685758 | 1.21653147390686  | -0.05163498370248 |
| C | -0.75721370581253 | -1.18272435891780 | -0.06442780924395 |
| C | -0.05529363151307 | 0.06102436342797  | -0.06392247633825 |

|   |                   |                   |                   |
|---|-------------------|-------------------|-------------------|
| C | 1.16163072538821  | -2.44907573965205 | -0.06780918953533 |
| C | 1.36121160021188  | 0.01009965592423  | -0.06610170435177 |
| C | -0.75877490838542 | 1.29678528772188  | -0.06162091686357 |
| C | 1.74253277977983  | -3.73983297991641 | -0.06933278408870 |
| C | 1.99535502289066  | -1.28865096621635 | -0.06778745078949 |
| C | 2.07501447313302  | 1.22663676029703  | -0.06655036900780 |
| C | -0.00885100097390 | 2.46841452326824  | -0.06262354122244 |
| C | 3.11148118991274  | -3.88415718203227 | -0.07071174942003 |
| H | 1.07259894377272  | -4.60194846808548 | -0.06929150631718 |
| C | 3.39337216151892  | -1.47269267939826 | -0.06930272106800 |
| C | 1.39307395284622  | 2.42764277213809  | -0.06505806975561 |
| H | 3.16530413308319  | 1.22592777373778  | -0.06827701298788 |
| H | -0.49907268108139 | 3.44227386305859  | -0.06171876432717 |
| C | 3.93832409108282  | -2.74234049010974 | -0.07069110594942 |
| H | 3.55970314395915  | -4.88024944665504 | -0.07180488109516 |
| H | 4.05684058593635  | -0.60703459854379 | -0.06928410958524 |
| H | 1.95139132476602  | 3.36625542817579  | -0.06574534411878 |
| H | 5.02423477011371  | -2.86201577408703 | -0.07176056502254 |
| N | -2.84615173036865 | -2.31607547324816 | -0.06424022183768 |
| N | -0.19296032358412 | -2.36014969620548 | -0.06636746103139 |
| H | -2.23662582690730 | -3.14331349547112 | -0.06640334604189 |

[pBiphe-H]<sup>+</sup> (6), S<sub>0,eq</sub> in methanol

|   |                   |                   |                   |
|---|-------------------|-------------------|-------------------|
| C | -6.14794847101300 | -3.87806890120171 | -0.07287869536625 |
| C | -4.77420383617725 | -3.74770699983620 | -0.07717046209463 |
| C | -4.21239581698066 | -2.46072668357205 | -0.06661186112625 |
| C | -5.01429876713497 | -1.29381518498989 | -0.05121022166300 |
| C | -6.41301607886094 | -1.46830859808813 | -0.04696687793044 |
| C | -6.96728939020210 | -2.73444659650456 | -0.05779944320446 |
| C | -4.36350140024449 | 0.00100556303100  | -0.04137961136261 |
| C | -2.93966096467055 | 0.05536784907350  | -0.05324506846592 |
| C | -2.21645867905918 | -1.16072495329464 | -0.06483199167509 |
| C | -2.23115829524704 | 1.29343012127138  | -0.04923696496611 |

|   |                   |                   |                   |
|---|-------------------|-------------------|-------------------|
| C | -2.98538670463407 | 2.46103616648435  | -0.02246084572111 |
| C | -4.38533287904601 | 2.41363283311356  | -0.00839702598984 |
| C | -5.07293645058526 | 1.21296868105356  | -0.01975220136797 |
| H | -6.59900013500262 | -4.87283184538436 | -0.08136517789840 |
| H | -4.11452251055714 | -4.61829544174460 | -0.08884956485302 |
| H | -7.06771562305214 | -0.59637345550296 | -0.03581372027742 |
| H | -8.05370577601197 | -2.84731749486095 | -0.05483228540817 |
| H | -2.49922081039355 | 3.43661631021236  | -0.01013294111974 |
| H | -4.94539345696125 | 3.35139916204053  | 0.01188951801042  |
| H | -6.16290597291040 | 1.21620319594396  | -0.00960458494729 |
| C | -0.75734645418991 | -1.18645123049338 | -0.06747965027799 |
| C | -0.05592455518607 | 0.05795923782843  | -0.07328452564308 |
| C | 1.16416721915758  | -2.44928659255063 | -0.07096178835048 |
| C | 1.36054591564938  | 0.00883144740483  | -0.08492122312777 |
| C | -0.75938437184103 | 1.29365004224392  | -0.07125491720369 |
| C | 1.74736378654026  | -3.73879117154472 | -0.06554021822341 |
| C | 1.99616249059952  | -1.28888701204677 | -0.08053682907100 |
| C | 2.07428867832734  | 1.22499973757466  | -0.10079992979080 |
| C | -0.01040032134110 | 2.46572669509285  | -0.09213017178237 |
| C | 3.11683137708229  | -3.88113022726523 | -0.06882923318190 |
| H | 1.07988584063827  | -4.60309502284807 | -0.05826516227658 |
| C | 3.39477674633931  | -1.46980878447811 | -0.08437536793873 |
| C | 1.39137298855841  | 2.42545547120256  | -0.10657602364091 |
| H | 3.16474701733643  | 1.22481438669692  | -0.11078343748377 |
| H | -0.50089422336542 | 3.43957639009933  | -0.09971046401409 |
| C | 3.94213322543176  | -2.73841918065980 | -0.07831183667203 |
| H | 3.56622448584991  | -4.87698227445639 | -0.06400609285435 |
| H | 4.05638843289839  | -0.60247230899964 | -0.09119365613251 |
| H | 1.94906685067064  | 3.36454143874856  | -0.12244593786937 |
| H | 5.02847885259592  | -2.85626495246551 | -0.08066103846497 |
| N | -2.84884600482251 | -2.31787061157216 | -0.07030582131407 |
| N | -0.19144441719767 | -2.36292255672458 | -0.06736261883246 |
| H | -2.24711519698709 | -3.15083034303116 | -0.07664589642634 |

[pBiphe-H]<sup>+</sup> (6), S<sub>0,eq</sub> in dimethyl sulfoxide

|   |                   |                   |                   |
|---|-------------------|-------------------|-------------------|
| C | -6.14669669623826 | -3.87852049731820 | -0.07247973947023 |
| C | -4.77298287361854 | -3.74805235773511 | -0.07691629041304 |
| C | -4.21141792527649 | -2.46084209277939 | -0.06648895831618 |
| C | -5.01379134444234 | -1.29392494645918 | -0.05113407989896 |
| C | -6.41238432353233 | -1.46873184426755 | -0.04666414438268 |
| C | -6.96626194329710 | -2.73504853282841 | -0.05734189008731 |
| C | -4.36346810099343 | 0.00115685256152  | -0.04159503139646 |
| C | -2.93976886348333 | 0.05587261660254  | -0.05337698830658 |
| C | -2.21665951450778 | -1.16033922607622 | -0.06487350242754 |
| C | -2.23123816438076 | 1.29386420451295  | -0.04945373807382 |
| C | -2.98564319608797 | 2.46134623435777  | -0.02308232379572 |
| C | -4.38560438483433 | 2.41372608120792  | -0.00923175532355 |
| C | -5.07313063594706 | 1.21298659074625  | -0.02034415543901 |
| H | -6.59754964272180 | -4.87322164092902 | -0.08088241876909 |
| H | -4.11279297130079 | -4.61811349603473 | -0.08858886392272 |
| H | -7.06695334236175 | -0.59679199085220 | -0.03541535367299 |
| H | -8.05251572296533 | -2.84814453720510 | -0.05420036569823 |
| H | -2.49917336213374 | 3.43670190745506  | -0.01094200917274 |
| H | -4.94573878855715 | 3.35129295750481  | 0.01066522839096  |
| H | -6.16303076297885 | 1.21569810964053  | -0.01038841041027 |
| C | -0.75725722196583 | -1.18586688692195 | -0.06755785944621 |
| C | -0.05577945491898 | 0.05869029022969  | -0.07322599814046 |
| C | 1.16350583385122  | -2.44901267945092 | -0.07114149385807 |
| C | 1.36065267246669  | 0.00926267304676  | -0.08471499357245 |
| C | -0.75938165315021 | 1.29421963155118  | -0.07113522329691 |
| C | 1.74586763797963  | -3.73897476122317 | -0.06587292161844 |
| C | 1.99599858465712  | -1.28868212537357 | -0.08058439721025 |
| C | 2.07448324713505  | 1.22532204779134  | -0.10017451583132 |
| C | -0.01027929532904 | 2.46623681057264  | -0.09158177849127 |
| C | 3.11529996296522  | -3.88178623157283 | -0.06922891421763 |
| H | 1.07708409512066  | -4.60218360153088 | -0.05867562263876 |



|   |                   |                   |                   |
|---|-------------------|-------------------|-------------------|
| C | 3.39443395943799  | -1.47033419507520 | -0.08454062916766 |
| C | 1.39149480470042  | 2.42581262190579  | -0.10574810937933 |
| H | 3.16487738406805  | 1.22470913938672  | -0.10990502099905 |
| H | -0.50113683311845 | 3.43982881021377  | -0.09899885266253 |
| C | 3.94102450060796  | -2.73933832976785 | -0.07864625226926 |
| H | 3.56432965358453  | -4.87765461061295 | -0.06452288538806 |
| H | 4.05617996726806  | -0.60317915708443 | -0.09135056314850 |
| H | 1.94919397607266  | 3.36474358828261  | -0.12119658792453 |
| H | 5.02717912442207  | -2.85767374991346 | -0.08108332658549 |
| N | -2.84831007347323 | -2.31741136054546 | -0.07029050514051 |
| N | -0.19168147688207 | -2.36203526295262 | -0.06749158956860 |
| H | -2.24595049184036 | -3.15022074805941 | -0.07662903685856 |

[pBiphe-H]<sup>+</sup> (6), S<sub>0,eq</sub> in water

|   |                   |                   |                   |
|---|-------------------|-------------------|-------------------|
| C | -6.15244535102626 | -3.87490534654524 | -0.05083560567910 |
| C | -4.77860547016261 | -3.74618032541706 | -0.04993779368322 |
| C | -4.21563674518497 | -2.46004340026076 | -0.05784820316275 |
| C | -5.01571025849958 | -1.29267604086994 | -0.06714826156142 |
| C | -6.41461869844396 | -1.46476882803729 | -0.06818426305568 |
| C | -6.97044896736193 | -2.73017442550096 | -0.05995037748042 |
| C | -4.36303617843102 | 0.00066340607533  | -0.07444647463061 |
| C | -2.93921173129673 | 0.05295022342737  | -0.06659772524955 |
| C | -2.21653306885173 | -1.16359483439911 | -0.06094379279296 |
| C | -2.23092876137897 | 1.29072189339454  | -0.06869528834741 |
| C | -2.98395772673402 | 2.45911705824786  | -0.08912346270039 |
| C | -4.38386889465613 | 2.41327331990505  | -0.09909087127442 |
| C | -5.07190709807464 | 1.21291992059566  | -0.08978683624298 |
| H | -6.60453418340884 | -4.86873120218046 | -0.04432208132862 |
| H | -4.11903201639927 | -4.61647667239624 | -0.04298163920536 |
| H | -7.06702084154829 | -0.59139121571148 | -0.07481665160868 |
| H | -8.05657750552637 | -2.84166142967930 | -0.06033722467410 |
| H | -2.49595811981048 | 3.43351023922127  | -0.09944714141909 |
| H | -4.94300941128191 | 3.35116501738675  | -0.11438099070802 |

|   |                   |                   |                   |
|---|-------------------|-------------------|-------------------|
| H | -6.16165405141938 | 1.21541925349807  | -0.09650607061213 |
| C | -0.75751281373614 | -1.19041239544204 | -0.06210473133713 |
| C | -0.05683036120178 | 0.05438380693968  | -0.05442048154769 |
| C | 1.16628115207596  | -2.45071887138493 | -0.06661886092875 |
| C | 1.35944197800099  | 0.00700980064659  | -0.04652403611185 |
| C | -0.75973614628072 | 1.29022646343322  | -0.05117050627703 |
| C | 1.75353351153212  | -3.73818064836308 | -0.07664444346100 |
| C | 1.99622610616886  | -1.28955955706897 | -0.05553303615350 |
| C | 2.07313755942640  | 1.22306073082261  | -0.02973034106149 |
| C | -0.01146274537534 | 2.46261384749287  | -0.02968412578710 |
| C | 3.12334761746849  | -3.87728313150498 | -0.07615618700490 |
| H | 1.09071239159088  | -4.60539141463674 | -0.08500013591274 |
| C | 3.39531177467959  | -1.46633247191828 | -0.05460208069902 |
| C | 1.39022791263956  | 2.42338750911064  | -0.01934394420570 |
| H | 3.16334240825903  | 1.22188412764452  | -0.02288131327630 |
| H | -0.50352163182837 | 3.43533689880659  | -0.01855745337741 |
| C | 3.94633876808223  | -2.73309651554156 | -0.06498877739066 |
| H | 3.57434503818523  | -4.87191020239301 | -0.08443214402230 |
| H | 4.05323553834662  | -0.59656093129030 | -0.04646570214455 |
| H | 1.94733749217717  | 3.36229987764418  | -0.00302002939060 |
| H | 5.03253423856341  | -2.84821111749644 | -0.06474066105900 |
| N | -2.85147362205647 | -2.31978529318510 | -0.05735230585569 |
| N | -0.19042686298568 | -2.36717047654474 | -0.06710898424946 |
| H | -2.25434536123493 | -3.15498882352474 | -0.05514745032924 |

[pBiphe-Me]<sup>+</sup> (7), S<sub>0,eq</sub> in vacuum

|   |                  |                   |                   |
|---|------------------|-------------------|-------------------|
| N | 1.39756934357335 | -0.10787480590873 | -1.37061956018641 |
| C | 1.46786692413136 | 0.15564415258247  | 1.02560322314153  |
| C | 0.77937795911549 | 0.08318356511449  | -0.23198719006948 |
| C | 3.55932221230774 | 0.00366547974247  | -0.25668205776310 |
| C | 0.75532021695885 | 0.18641162695842  | 2.24895465612882  |
| C | 2.88691033138688 | 0.16755870713459  | 1.00891338983909  |
| C | 2.74821218339156 | -0.17559336140265 | -1.41708828223322 |

|   |                   |                   |                   |
|---|-------------------|-------------------|-------------------|
| C | 3.57371054793398  | 0.30716392878041  | 2.23189759411115  |
| H | 4.66314717897362  | 0.33355474268028  | 2.24889551444942  |
| C | 4.95934227643756  | -0.02133025429472 | -0.41105090515036 |
| H | 5.61000429556507  | 0.12097176991400  | 0.45217928028307  |
| C | 1.47658148649857  | 0.32625560202575  | 3.43169074982039  |
| H | 0.96428866289616  | 0.37475811796971  | 4.39236842474995  |
| C | 4.72355037503260  | -0.43270555282418 | -2.79375120359955 |
| H | 5.19186553815412  | -0.60573404282793 | -3.76469471387615 |
| C | 3.35347365980758  | -0.40277061186017 | -2.67822159804313 |
| H | 2.69886973241176  | -0.54656962479832 | -3.53926975570506 |
| C | 5.52738761228036  | -0.23456735581607 | -1.65234058897910 |
| H | 6.61507684587399  | -0.25392870096408 | -1.74943734016180 |
| C | 2.87381133519328  | 0.40249983709713  | 3.41831408733989  |
| H | 3.41333463199854  | 0.51813700776910  | 4.36028243115880  |
| N | -1.36302164735164 | 0.35625044763371  | -1.39586070179764 |
| C | -1.39992305452036 | -0.01786379929549 | 0.97598596225174  |
| C | -0.68838674985067 | 0.15524462853331  | -0.24958677540272 |
| C | -3.47625172784951 | -0.21972898662049 | -0.33204771149307 |
| C | -0.69914842846957 | 0.02114683214468  | 2.22251467375381  |
| C | -2.81530091187484 | -0.16800266831937 | 0.95122210685695  |
| C | -2.72816930923635 | 0.06609949109691  | -1.49702799555069 |
| C | -3.51323600285771 | -0.27646502470516 | 2.16238816525515  |
| H | -4.59732242750536 | -0.37954415534900 | 2.16718863028421  |
| C | -4.84353359271673 | -0.53033386450796 | -0.47300496254404 |
| H | -5.43473431176360 | -0.76625183530024 | 0.41114561086538  |
| C | -1.44176644999543 | -0.09440865179491 | 3.39373903951041  |
| H | -0.94268301528761 | -0.07391528216295 | 4.36161946481128  |
| C | -4.69476258446779 | -0.28164747112400 | -2.86112675554346 |
| H | -5.16097437333156 | -0.32424180585753 | -3.84737687063593 |
| C | -3.35287022513467 | 0.03014321362932  | -2.75917438050219 |
| H | -2.78503668526921 | 0.20926644828756  | -3.66942243405268 |
| C | -5.44897919806625 | -0.55855894202027 | -1.71256153212560 |
| H | -6.50827891827115 | -0.80724845381981 | -1.79801665530538 |

|   |                   |                   |                   |
|---|-------------------|-------------------|-------------------|
| C | -2.82942034988258 | -0.24126565493184 | 3.36375384517352  |
| H | -3.37986128995331 | -0.32669049761470 | 4.30295830344047  |
| C | -0.74020636300036 | 0.97237347515234  | -2.57334631128769 |
| H | 0.14085526323484  | 1.53771432593294  | -2.26829912115713 |
| H | -0.42770725875589 | 0.21891531981766  | -3.30595830208022 |
| H | -1.47610373774510 | 1.65568268412331  | -3.01206144797919 |

[methylene-pBiphe]<sup>2+</sup> (**8**), S<sub>0,eq</sub> in vacuum

|   |                   |                   |                   |
|---|-------------------|-------------------|-------------------|
| N | 1.09265235174910  | 0.25986735576828  | -1.23982733959293 |
| C | 1.42472098554716  | 0.05133601995843  | 1.15904055209091  |
| C | 0.66628642505579  | 0.09307993509177  | 0.00604582014942  |
| C | 3.33101191249736  | 0.38972657454451  | -0.35568925055947 |
| C | 0.73793938819374  | -0.14036989339930 | 2.40079112040419  |
| C | 2.82668213542559  | 0.20450980819352  | 0.99735489528916  |
| C | 2.44570762715915  | 0.41734133969429  | -1.49125430473647 |
| C | 3.59139074873499  | 0.16064163087160  | 2.17801630824637  |
| H | 4.67601490154056  | 0.26847658783819  | 2.15809201543334  |
| C | 4.70489479686319  | 0.55088395216676  | -0.62428933201868 |
| H | 5.41736140547504  | 0.53766135458692  | 0.20082441982305  |
| C | 1.55289842056703  | -0.17337763988162 | 3.52273836244989  |
| H | 1.13410737412377  | -0.31431714459052 | 4.52052569613307  |
| C | 4.28238421458206  | 0.74828206917326  | -3.00161976476073 |
| H | 4.66417596166490  | 0.88729883447872  | -4.01519856199566 |
| C | 2.92451205059729  | 0.59506803472870  | -2.79579050836450 |
| H | 2.23682181748590  | 0.61308513966200  | -3.64361979040638 |
| C | 5.17238278173506  | 0.72586437733251  | -1.91297550836014 |
| H | 6.24314388097839  | 0.84792158414479  | -2.08804612404117 |
| C | 2.95192285657762  | -0.02407640966507 | 3.39606607204110  |
| H | 3.55735666511406  | -0.05618783123417 | 4.30501304708402  |
| N | -1.19254624125769 | 0.03669697821848  | -1.23095585144744 |
| C | -1.45941853002011 | -0.23095528126140 | 1.17020231015922  |
| C | -0.73238113158950 | -0.04351744547681 | 0.01147387036228  |
| C | -3.40667370551005 | -0.26984441250323 | -0.32962833572556 |

|   |                   |                   |                   |
|---|-------------------|-------------------|-------------------|
| C | -0.73897426635169 | -0.28506937913440 | 2.40648466951295  |
| C | -2.86565950528570 | -0.35283942479041 | 1.01936751691472  |
| C | -2.55229745724042 | -0.07167697353322 | -1.47190703091196 |
| C | -3.59824797593335 | -0.54360761775834 | 2.20578542605979  |
| H | -4.68331493599238 | -0.64815814328234 | 2.19429505884318  |
| C | -4.78772596077661 | -0.37839281838933 | -0.58755348612609 |
| H | -5.47773348440777 | -0.52906374782097 | 0.24297925097258  |
| C | -1.52340101425009 | -0.47505999499131 | 3.53457199856327  |
| H | -1.07761150763924 | -0.53168759705437 | 4.52900317112750  |
| C | -4.42987521969540 | -0.10414417327833 | -2.96785754822343 |
| H | -4.83910607271507 | -0.04241851273083 | -3.97837785614826 |
| C | -3.06652308940723 | 0.00906556930323  | -2.77256532128767 |
| H | -2.40198337128168 | 0.15963965921287  | -3.62566006255491 |
| C | -5.29021883368853 | -0.29808533677199 | -1.87244679348722 |
| H | -6.36565256759577 | -0.38600583015350 | -2.03914431542796 |
| C | -2.92574570919163 | -0.60009702537550 | 3.41873496994734  |
| H | -3.50643120814815 | -0.74861176423384 | 4.33225282221348  |
| C | -0.06246113366114 | 0.23971388424833  | -2.15649564941931 |
| H | -0.15794921251398 | 1.19703087672739  | -2.69389502927056 |
| H | 0.01596343248542  | -0.59302716863375 | -2.87396160895438 |

[ethylene-pBiphe]<sup>2+</sup> (**9**), S<sub>0,eq</sub> in vacuum

|   |                  |                   |                   |
|---|------------------|-------------------|-------------------|
| N | 1.42639671511010 | -0.07660960925191 | -1.34935685135418 |
| C | 1.41691090128120 | 0.15436268184627  | 1.03511350486142  |
| C | 0.73635772463320 | 0.02074318165570  | -0.19974565409102 |
| C | 3.54267315518433 | 0.23629916994624  | -0.21429267831665 |
| C | 0.69686185662118 | 0.10600618735727  | 2.26521744351710  |
| C | 2.83313103082021 | 0.34279876340635  | 1.03136798366798  |
| C | 2.81483123280086 | -0.04562605072434 | -1.40530048362483 |
| C | 3.48500209237978 | 0.58550384181332  | 2.25515346593424  |
| H | 4.55964699450216 | 0.75742759053111  | 2.28503956206798  |
| C | 4.94722881424354 | 0.34378201981602  | -0.30120174666676 |
| H | 5.52889790633147 | 0.57405143999550  | 0.59012624619109  |

|   |                   |                   |                   |
|---|-------------------|-------------------|-------------------|
| C | 1.38997576894851  | 0.34482465287430  | 3.44282015434990  |
| H | 0.86897423905864  | 0.34671684029541  | 4.40007985980532  |
| C | 4.87898192626111  | -0.18818288761740 | -2.65156953892457 |
| H | 5.40320475977386  | -0.37572068149417 | -3.59091203062053 |
| C | 3.50380568114235  | -0.28160439187190 | -2.61389389947505 |
| H | 2.98476286243147  | -0.55827818877906 | -3.52890525642643 |
| C | 5.60640258170690  | 0.14383814264696  | -1.49427031332247 |
| H | 6.69402552983891  | 0.22788627352682  | -1.53868666807826 |
| C | 2.76909403510560  | 0.60129627595808  | 3.43404000704240  |
| H | 3.28227010589653  | 0.79935992317498  | 4.37747226799717  |
| N | -1.40957424477746 | 0.12979906426181  | -1.36443765471727 |
| C | -1.43269398947993 | -0.20260879048207 | 1.00794944360857  |
| C | -0.73536163703714 | -0.01658633478380 | -0.21063831901928 |
| C | -3.54098899170196 | -0.23200140479341 | -0.27305940719403 |
| C | -0.72959857446014 | -0.20644880831192 | 2.24877791704768  |
| C | -2.84864099672386 | -0.39060583377123 | 0.97673623463213  |
| C | -2.79704994011011 | 0.10051925132360  | -1.44088456787580 |
| C | -3.51722310162038 | -0.68438344478331 | 2.18014289605859  |
| H | -4.59214158431972 | -0.85700231664087 | 2.18806412719908  |
| C | -4.94406503975023 | -0.33667079775503 | -0.38394880598736 |
| H | -5.53769151679422 | -0.60497035508751 | 0.48866167981078  |
| C | -1.43878932028340 | -0.49456871628670 | 3.40559129184971  |
| H | -0.93100844746921 | -0.53702645302131 | 4.36899627441034  |
| C | -4.84397225085194 | 0.29443929286591  | -2.70849298172602 |
| H | -5.35536662120906 | 0.52123558072167  | -3.64624696033533 |
| C | -3.46957030113706 | 0.38709365345210  | -2.64781314492979 |
| H | -2.93833932066095 | 0.70259207043191  | -3.54305013488234 |
| C | -5.58692090330508 | -0.08684130146683 | -1.57651790267345 |
| H | -6.67371134158432 | -0.16974070565349 | -1.63956454188637 |
| C | -2.81758877337964 | -0.74997194947930 | 3.36705091962621  |
| H | -3.34365638076345 | -0.98737500165353 | 4.29416275156580  |
| C | -0.63021797955218 | 0.43010554334783  | -2.56448275361458 |
| H | -0.47399274211438 | 1.52036134626985  | -2.62088640216916 |

|   |                   |                   |                   |
|---|-------------------|-------------------|-------------------|
| H | -1.19193124159259 | 0.11807298423736  | -3.44844891122887 |
| C | 0.66382067530538  | -0.32381059390870 | -2.57205733123648 |
| H | 1.23771053296410  | 0.02671447171856  | -3.43351914483747 |
| H | 0.50882811833697  | -1.41049562585713 | -2.67857994602914 |

l-amino-pBiphe (**10**), S<sub>0,eq</sub> in vacuum

|   |                   |                   |                   |
|---|-------------------|-------------------|-------------------|
| N | 1.37391451675050  | -0.17217322365230 | -1.37375497324376 |
| C | 1.46863911797690  | -0.03790252373387 | 1.02926600319870  |
| C | 0.76607247363081  | -0.08395021860865 | -0.22836800317483 |
| C | 3.55427267321498  | 0.05056960672543  | -0.28486342999074 |
| C | 0.75616209306110  | -0.06967226677040 | 2.25924426559226  |
| C | 2.89356974235079  | -0.02080040813420 | 1.00374946160544  |
| C | 2.73154123074403  | -0.11862043624892 | -1.43931525179998 |
| C | 3.57512576964958  | -0.14628909815294 | 2.23650378945927  |
| H | 4.65768617206813  | -0.25237409125766 | 2.24740050301810  |
| C | 4.95194806698790  | 0.27083772584295  | -0.49078247348299 |
| C | 1.48137887900137  | -0.14754714208759 | 3.44532349240796  |
| H | 0.96864967749762  | -0.18893461383056 | 4.40596186028320  |
| C | 4.66190226910282  | -0.11243363937268 | -2.88526322576231 |
| H | 5.11444472215668  | -0.19421122100574 | -3.87623961324898 |
| C | 3.29781470080236  | -0.22168047471144 | -2.72795946721328 |
| H | 2.61405367473729  | -0.37186210821605 | -3.56366333668660 |
| C | 5.47479073011267  | 0.15659773361024  | -1.77901661020596 |
| H | 6.54831593277954  | 0.31024356458802  | -1.92068645923236 |
| C | 2.87511486170050  | -0.21216609481504 | 3.42627544456903  |
| H | 3.42075920477268  | -0.32539528039132 | 4.36598322676300  |
| N | -1.31716953075039 | -0.07682384678570 | -1.39174650423853 |
| C | -1.42187150701755 | -0.04209730882274 | 1.02087996308958  |
| C | -0.71653238452449 | -0.07099894621925 | -0.23646539498119 |
| C | -3.49981352211431 | -0.03085170338810 | -0.29074349155378 |
| C | -0.71687994999513 | -0.03778293618115 | 2.25568062527426  |
| C | -2.84077745758961 | -0.01773145353699 | 0.99570187045022  |
| C | -2.67572273747311 | -0.06144011731807 | -1.44901485574057 |

|   |                   |                   |                   |
|---|-------------------|-------------------|-------------------|
| C | -3.54246776935096 | 0.01859635253106  | 2.21653392496693  |
| H | -4.63245008100858 | 0.03897735016304  | 2.22172138740828  |
| C | -4.90006047144823 | -0.01483309711908 | -0.45958423152583 |
| H | -5.55471412847582 | 0.00823451529613  | 0.41297807365161  |
| C | -1.45605527879829 | 0.00463786983603  | 3.43464102436722  |
| H | -0.95228305492511 | 0.02243760177407  | 4.40081842061205  |
| C | -4.64517368611784 | -0.05909312262379 | -2.86692060417234 |
| H | -5.09979542343692 | -0.07011669371758 | -3.86022779402895 |
| C | -3.27414476894177 | -0.07462215407671 | -2.73107562921746 |
| H | -2.60249945987492 | -0.09795107939585 | -3.59092078469753 |
| C | -5.46273724032262 | -0.02888515353411 | -1.72117579750805 |
| H | -6.54980886019860 | -0.01655222818278 | -1.82890620043651 |
| C | -2.85444167126682 | 0.03216074390371  | 3.41320736393152  |
| H | -3.40421260371011 | 0.06542977141741  | 4.35653720175625  |
| N | 5.81283572696759  | 0.58618321735229  | 0.55374596754869  |
| H | 6.71915864508661  | 0.91171754630205  | 0.23875131226835  |
| H | 5.42366070618871  | 1.21226908254883  | 1.25038894992057  |

2-amino-pBiphe (**11**), S<sub>0,eq</sub> in vacuum

|   |                   |                   |                   |
|---|-------------------|-------------------|-------------------|
| C | -7.26925469424944 | -2.70646982394118 | -0.02918614119142 |
| C | -5.89691254967521 | -2.58171203928495 | -0.03385569079147 |
| C | -5.28708017545242 | -1.30489844949807 | -0.01849682185873 |
| C | -6.10230211735356 | -0.14053380466377 | 0.00203770562290  |
| C | -7.50391189659922 | -0.29772647083797 | 0.00635522227681  |
| C | -8.07787941541245 | -1.55433121726085 | -0.00893769008179 |
| C | -5.43251571673625 | 1.14089650537077  | 0.01725563738753  |
| C | -4.01291095997558 | 1.15576080926640  | 0.01052602780581  |
| C | -3.31598902621403 | -0.10913065035839 | -0.01103888931691 |
| C | -3.30170650290137 | 2.38788095950871  | 0.02475795268386  |
| C | -4.03416690978356 | 3.57196413597669  | 0.04543973002999  |
| C | -5.43234067430379 | 3.55945631789336  | 0.05211997750979  |
| C | -6.12669467994634 | 2.36623387532888  | 0.03831964192892  |
| H | -7.73159041028957 | -3.69625957373980 | -0.04120431198700 |



|   |                   |                   |                   |
|---|-------------------|-------------------|-------------------|
| H | -5.23238851665184 | -3.44728845233850 | -0.04943302765943 |
| H | -8.15135295826966 | 0.58045202540433  | 0.02183960592004  |
| H | -9.16583371533100 | -1.65271738513004 | -0.00536724078997 |
| H | -3.52415651928341 | 4.53500463839484  | 0.05678407282821  |
| H | -5.97717389623010 | 4.50612117842540  | 0.06839372711307  |
| H | -7.21673198739991 | 2.37780519583901  | 0.04380016541740  |
| C | -1.83648116393040 | -0.11157951959039 | -0.01842194153157 |
| C | -1.12847755571253 | 1.14420084463441  | -0.00321552314789 |
| C | 0.12405378770736  | -1.31962018946958 | -0.04579675933039 |
| C | 0.29181078500486  | 1.12004194441560  | -0.01008485306204 |
| C | -1.82881507776293 | 2.38275056427488  | 0.01745972784383  |
| C | 0.73459330203225  | -2.59766847427929 | -0.06726822733464 |
| C | 0.95596376466072  | -0.16554648570974 | -0.03091930321457 |
| C | 0.99393695174313  | 2.34083168999473  | 0.00252701231326  |
| C | -1.08821693461205 | 3.56132662533599  | 0.02995552540638  |
| C | 2.09942609565199  | -2.73503214039054 | -0.07345070256776 |
| H | 0.07132902855557  | -3.46432099123998 | -0.07791968993372 |
| C | 2.35141181369620  | -0.32577257241021 | -0.03366117628226 |
| C | 0.31018673427449  | 3.53987263950798  | 0.02224781610036  |
| H | 2.08412064926256  | 2.34448516556071  | -0.00456735183734 |
| H | -1.59178286384991 | 4.52777578547739  | 0.04543656804310  |
| C | 2.93963006151664  | -1.58970761836038 | -0.05530721493068 |
| H | 2.55369098464846  | -3.72932167396055 | -0.09515288474756 |
| H | 3.00334302884380  | 0.54984884914508  | -0.02149730849704 |
| H | 0.86190987738143  | 4.48255596211569  | 0.03141839717160  |
| N | -3.92825731404673 | -1.25920015299202 | -0.02436063428420 |
| N | -1.22863339292149 | -1.26567529844049 | -0.03892354296609 |
| N | 4.30336216879921  | -1.74453247119980 | -0.10217979226045 |
| H | 4.87499986412110  | -0.95431560269356 | 0.16200409123598  |
| H | 4.68068872699505  | -2.64220465408082 | 0.16746811496605  |

3-amino-pBiphe (**12**), S<sub>0,eq</sub> in vacuum

|   |                  |                  |                   |
|---|------------------|------------------|-------------------|
| N | 1.36816188778390 | 0.00314396708378 | -1.38348892306618 |
|---|------------------|------------------|-------------------|

|   |                   |                   |                   |
|---|-------------------|-------------------|-------------------|
| C | 1.45079458058805  | 0.01602590067225  | 1.03288858668204  |
| C | 0.75902645375006  | -0.00134420448817 | -0.23251041129878 |
| C | 3.53600867279816  | 0.04668409442934  | -0.26173539002681 |
| C | 0.73928244613928  | 0.00883797122016  | 2.26423414206244  |
| C | 2.87115681693313  | 0.04121937528085  | 1.01618591241627  |
| C | 2.72867684948548  | 0.02491607879570  | -1.43274536716352 |
| C | 3.56331106682505  | 0.05928630887064  | 2.24465509310501  |
| H | 4.65343806132471  | 0.07827104007408  | 2.25775508506499  |
| C | 4.93573215611605  | 0.07317144935822  | -0.43279393120745 |
| H | 5.59234000606137  | 0.09213502064821  | 0.43866972833263  |
| C | 1.46866653892183  | 0.02741327691572  | 3.44947565250626  |
| H | 0.95818678064813  | 0.02281207810984  | 4.41225079278008  |
| C | 4.70838353325377  | 0.05429507087000  | -2.85812427465897 |
| C | 3.32687530893418  | 0.03059644202083  | -2.70783935543208 |
| H | 2.65651671301923  | 0.01378638288138  | -3.56936199728692 |
| C | 5.50798451704450  | 0.07587363965834  | -1.68508933589355 |
| H | 6.59685148854436  | 0.09026578484143  | -1.78294087845815 |
| C | 2.86780427751087  | 0.05238246233938  | 3.43641386291994  |
| H | 3.41209968360504  | 0.06635169106704  | 4.38351243041701  |
| N | -1.32392829623330 | -0.03881550785626 | -1.39657940507728 |
| C | -1.43267638955691 | -0.03357126122597 | 1.01687791698945  |
| C | -0.72425253209810 | -0.02552461044408 | -0.24076541859776 |
| C | -3.50846501115011 | -0.07294128882930 | -0.29973024955845 |
| C | -0.73340749731411 | -0.01751020895660 | 2.25576540077393  |
| C | -2.85185463042341 | -0.05801924322820 | 0.98815022079342  |
| C | -2.68219874416524 | -0.06203225033083 | -1.45637856906958 |
| C | -3.55832209487627 | -0.06671529171289 | 2.20673257756495  |
| H | -4.64830151749856 | -0.08551775999249 | 2.20775226799591  |
| C | -4.90826969876559 | -0.09738052473966 | -0.47136618572926 |
| H | -5.56486798568745 | -0.10622911602356 | 0.39999763226288  |
| C | -1.47742832695536 | -0.02714872701825 | 3.43228147601734  |
| H | -0.97636558914937 | -0.01581211679812 | 4.39998286367941  |
| C | -4.64861980566590 | -0.09974143675568 | -2.87850112715555 |

|   |                   |                   |                   |
|---|-------------------|-------------------|-------------------|
| H | -5.10096784851409 | -0.11047137657861 | -3.87286506079617 |
| C | -3.27793464215840 | -0.07590079633281 | -2.73970529683507 |
| H | -2.60424889326910 | -0.06711599894669 | -3.59823861999941 |
| C | -5.46848552367644 | -0.11050010448115 | -1.73409992905415 |
| H | -6.55528069507004 | -0.12941484000103 | -1.84348279703000 |
| C | -2.87556606600311 | -0.05158133061887 | 3.40636989910923  |
| H | -3.42938300797625 | -0.05865991495028 | 4.34790879956039  |
| N | 5.30532569273321  | 0.01269867590319  | -4.09613487297174 |
| H | 4.72842593663003  | 0.24818682411977  | -4.89198729865197 |
| H | 6.25727532755674  | 0.34529437514933  | -4.16269564601481 |

4-amino-pBiphe (**13**), S<sub>0,eq</sub> in vacuum

|   |                   |                   |                   |
|---|-------------------|-------------------|-------------------|
| C | -7.19614670673582 | -2.76566679951696 | -0.02028077932559 |
| C | -5.82537144889555 | -2.62560087117320 | -0.01478878012035 |
| C | -5.22895697545225 | -1.34255644155087 | -0.01011091478061 |
| C | -6.05725233607551 | -0.18675630889880 | -0.01125316672722 |
| C | -7.45693642459054 | -0.35977616838174 | -0.01666729109621 |
| C | -8.01736429857557 | -1.62253283081798 | -0.02116438086169 |
| C | -5.40399126033609 | 1.10351208991751  | -0.00747690034771 |
| C | -3.98497312728422 | 1.13586668192880  | -0.00343084947120 |
| C | -3.27447934407481 | -0.12056104930406 | 0.00046547546155  |
| C | -3.28663101950772 | 2.37609047104312  | -0.00268284544934 |
| C | -4.03368997567101 | 3.5511259777483   | -0.00205785859295 |
| C | -5.43172873252580 | 3.52170768978208  | -0.00429666139085 |
| C | -6.11265424201268 | 2.32060599447035  | -0.00777798396998 |
| H | -7.64732064485509 | -3.76063439502193 | -0.02366546505183 |
| H | -5.15345351759486 | -3.48556463474684 | -0.01327691772883 |
| H | -8.11379700482347 | 0.51138833935105  | -0.01754596367765 |
| H | -9.10418099295473 | -1.73273946684684 | -0.02537616936441 |
| H | -3.53507399130005 | 4.52020876691517  | 0.00058353961991  |
| H | -5.98764952182015 | 4.46202572579592  | -0.00356976348086 |
| H | -7.20278794988563 | 2.32013214896115  | -0.01032131304249 |
| C | -1.79781306063836 | -0.10043426482771 | 0.01161306633851  |

|   |                   |                   |                   |
|---|-------------------|-------------------|-------------------|
| C | -1.10048531014980 | 1.15786787928912  | 0.00422791277599  |
| C | 0.17866340298947  | -1.28929107570548 | 0.03242373583883  |
| C | 0.32068657487670  | 1.14176035115871  | 0.00246523475669  |
| C | -1.81368154781226 | 2.38889849458330  | -0.00413402629432 |
| C | 0.75752786691253  | -2.60649014127504 | 0.05188146017362  |
| C | 1.00306556172398  | -0.13470635099812 | 0.01167033182944  |
| C | 1.01117627048011  | 2.36959900954000  | -0.00776854091848 |
| C | -1.08348876170039 | 3.57358800053324  | -0.01483289159060 |
| C | 2.14839206300757  | -2.71769773138539 | 0.03065771833697  |
| C | 2.40162521127946  | -0.29227873049904 | -0.00170248317739 |
| C | 0.31562220021903  | 3.56209300798547  | -0.01627625664940 |
| H | 2.10126260916754  | 2.38027773043532  | -0.00809742086275 |
| H | -1.59442365032496 | 4.53633245709187  | -0.02307141825188 |
| C | 2.94506795451504  | -1.56759656486848 | 0.00428957709619  |
| H | 2.61303024493915  | -3.70643869983517 | 0.03996531182704  |
| H | 3.06193272352102  | 0.57453455955318  | -0.01987176121899 |
| H | 0.85944921655742  | 4.50937771403419  | -0.02429834813263 |
| H | 4.03186420652762  | -1.68355310119316 | -0.01016472175372 |
| N | -3.87024722507402 | -1.28042132815325 | -0.00380021850934 |
| N | -1.16948071205995 | -1.24341382888425 | 0.02714093589466  |
| N | -0.09537914876132 | -3.65341077010429 | 0.10418032037605  |
| H | -1.08204431021897 | -3.42508621194328 | 0.03112188144448  |
| H | 0.22781713499511  | -4.59688532421249 | -0.03402440993060 |

8-amino-pBiphe (**14**),  $S_{0,eq}$  in vacuum

|   |                  |                   |                   |
|---|------------------|-------------------|-------------------|
| N | 1.34721938540994 | 0.13521515314189  | -1.36942405806119 |
| C | 1.45911846696194 | 0.05819175098405  | 1.04798377763530  |
| C | 0.75282006797356 | 0.05697045415788  | -0.21212060199791 |
| C | 3.52815891188403 | 0.17902607833225  | -0.28214501611856 |
| C | 0.75042158426910 | 0.00436299877751  | 2.28527175096399  |
| C | 2.87475713949910 | 0.06764558636137  | 0.99725836971439  |
| C | 2.69975543191736 | 0.22163877742281  | -1.43700448409080 |
| C | 3.58203958835273 | -0.04741790511401 | 2.21204797401320  |

|   |                   |                   |                   |
|---|-------------------|-------------------|-------------------|
| H | 4.67226010215655  | -0.03607832713653 | 2.21774131849342  |
| C | 4.92756871898231  | 0.25058444275652  | -0.45533237786922 |
| H | 5.58811832528409  | 0.22171014165005  | 0.41280497086179  |
| C | 1.49555745184936  | -0.23030367292414 | 3.46132786470894  |
| C | 4.65696437634222  | 0.41358263434620  | -2.85790976019267 |
| H | 5.10611389037184  | 0.50582286260683  | -3.84941752536620 |
| C | 3.28879455405269  | 0.33967718005608  | -2.71868744396209 |
| H | 2.61219583207900  | 0.36639321565598  | -3.57462397494483 |
| C | 5.48014063732479  | 0.36753537872482  | -1.71536390735520 |
| H | 6.56554778486212  | 0.42603591326319  | -1.82587880096695 |
| C | 2.90998425420831  | -0.21960792374390 | 3.39378674961527  |
| H | 3.47167926567295  | -0.35861916596410 | 4.32173224268860  |
| N | -1.32036175397097 | -0.24234979560757 | -1.35614124431291 |
| C | -1.42249728991791 | 0.04817572992040  | 1.04139197124596  |
| C | -0.72145221936893 | -0.07278667552819 | -0.21140487661149 |
| C | -3.49981028395589 | -0.11208249524750 | -0.25962456869790 |
| C | -0.71108813677675 | 0.17155768552458  | 2.27237055726060  |
| C | -2.84029506203941 | 0.09877944573591  | 1.00903553584047  |
| C | -2.67736761104515 | -0.29824532680430 | -1.40448423166339 |
| C | -3.54259972496209 | 0.36665512542137  | 2.20124274556875  |
| H | -4.63137334528128 | 0.41993879294196  | 2.19753706483833  |
| C | -4.90080365671223 | -0.15166680327553 | -0.42141574478243 |
| H | -5.55362489240033 | -0.01220041107387 | 0.44167545535570  |
| C | -1.45195997087536 | 0.50142362594704  | 3.41080985476120  |
| H | -0.94309899386251 | 0.73256844163530  | 4.34492072501707  |
| C | -4.64959508283470 | -0.56917652567812 | -2.79273537099256 |
| H | -5.10586341254265 | -0.74708873830266 | -3.76932641393801 |
| C | -3.27852660591194 | -0.52735356019261 | -2.66505748203456 |
| H | -2.60880763446102 | -0.66250741003393 | -3.51607839607352 |
| C | -5.46580704348889 | -0.37799377910311 | -1.66128345063605 |
| H | -6.55303367151263 | -0.41009730615292 | -1.76318884603513 |
| C | -2.84838963776700 | 0.60253038341902  | 3.36867108773487  |
| H | -3.38969091150432 | 0.86708187608770  | 4.28016451989757  |

|   |                  |                   |                  |
|---|------------------|-------------------|------------------|
| N | 0.92813976362570 | -0.45980477870191 | 4.69726308245683 |
| H | 0.00908304042094 | -0.88664323417563 | 4.69666736208376 |
| H | 1.55380836769127 | -0.87437984011018 | 5.37634359594752 |

9-amino-pBiphe (**15**), S<sub>0,eq</sub> in vacuum

|   |                   |                   |                   |
|---|-------------------|-------------------|-------------------|
| N | 1.35486007293189  | 0.05121188700761  | -1.43150867526940 |
| C | 1.46823537836163  | 0.06992588972593  | 0.98050815250513  |
| C | 0.76179311183668  | 0.03780197533954  | -0.27074177661858 |
| C | 3.53997923126497  | 0.13408362457758  | -0.33105831119982 |
| C | 0.78070614935960  | 0.05334799431792  | 2.22577053124823  |
| C | 2.88746086882910  | 0.11738889361570  | 0.96088390519250  |
| C | 2.71269768784134  | 0.09871674467959  | -1.48741813508666 |
| C | 3.59730899441161  | 0.14176111054599  | 2.16969849833123  |
| H | 4.68758665560086  | 0.17729260158297  | 2.16442112725667  |
| C | 4.93873644617301  | 0.18385177769689  | -0.50421871160211 |
| H | 5.59485646671431  | 0.21373724056675  | 0.36716528758629  |
| C | 1.51952661785992  | 0.08053635502276  | 3.39817081777684  |
| H | 1.01736785320431  | 0.07305085033297  | 4.36642869139328  |
| C | 4.68058643537350  | 0.16135939905093  | -2.90981651927746 |
| H | 5.13195016623159  | 0.17235449831821  | -3.90471135050918 |
| C | 3.31068704262233  | 0.11307349065223  | -2.77016217284890 |
| H | 2.63776350596989  | 0.08457302841966  | -3.62891329394775 |
| C | 5.50058133424087  | 0.19729204556117  | -1.76621137340198 |
| H | 6.58687946670322  | 0.23656993228253  | -1.87555677185420 |
| C | 2.93066269288455  | 0.12353286813903  | 3.39267746804777  |
| N | -1.33783850647341 | -0.04594563270309 | -1.40210894442820 |
| C | -1.40956869513072 | -0.02712363517468 | 1.01249802990157  |
| C | -0.72048714330181 | -0.01445508047992 | -0.25650441299916 |
| C | -3.50461494548234 | -0.10856215620735 | -0.27207447130751 |
| C | -0.69287767553015 | 0.00690803112831  | 2.24112300498616  |
| C | -2.82836015629475 | -0.07395043126376 | 1.00532889376012  |
| C | -2.69644516525588 | -0.09269596816195 | -1.44119258548678 |
| C | -3.51663627438774 | -0.08466373153989 | 2.23433214140123  |

|   |                   |                   |                   |
|---|-------------------|-------------------|-------------------|
| H | -4.60610206112785 | -0.12008280348372 | 2.25127770928589  |
| C | -4.90626025890597 | -0.15687603714780 | -0.42191986063173 |
| H | -5.54962361993051 | -0.16978263976301 | 0.45922204447593  |
| C | -1.41937867468929 | -0.00429437456080 | 3.42810546609000  |
| H | -0.90553322499923 | 0.02347754069969  | 4.38880780484916  |
| C | -4.68305863020676 | -0.17308217676851 | -2.83264612166586 |
| H | -5.15016264492301 | -0.19840979357472 | -3.81989513678288 |
| C | -3.31094680161367 | -0.12583377920161 | -2.71510037253606 |
| H | -2.65052042392639 | -0.11197902784072 | -3.58380122245575 |
| C | -5.48519324165683 | -0.18857693234095 | -1.67591356935054 |
| H | -6.57309418642900 | -0.22586960605269 | -1.76860746227882 |
| C | -2.81724937836039 | -0.04964380248818 | 3.42370013719085  |
| H | -3.35715025785564 | -0.05699791817222 | 4.37327619211325  |
| N | 3.61526518619419  | 0.18840558425243  | 4.58055668142713  |
| H | 3.13398872723461  | -0.10811365579433 | 5.41775773450594  |
| H | 4.60252187463728  | -0.02541418079653 | 4.56567093221412  |

10-amino-pBiphe (**16**),  $S_{0,eq}$  in vacuum

|   |                   |                   |                   |
|---|-------------------|-------------------|-------------------|
| C | -7.21298210379603 | -2.71672908194275 | 0.22466904396822  |
| C | -5.84264651762058 | -2.57384662029638 | 0.23311388612973  |
| C | -5.24916496124577 | -1.29334276094949 | 0.12971739563258  |
| C | -6.07835825641667 | -0.14371903693361 | 0.01646356355673  |
| C | -7.47784626605911 | -0.31992704454376 | 0.00864201468346  |
| C | -8.03544340203124 | -1.57966406450666 | 0.11093635021998  |
| C | -5.42600035498020 | 1.14247744900091  | -0.08137831884629 |
| C | -4.00716048781819 | 1.17463725907721  | -0.05003360852775 |
| C | -3.29624948854569 | -0.07408306661126 | 0.05398991188782  |
| C | -3.30394848345145 | 2.40844859930298  | -0.12352209891170 |
| C | -4.04789790756377 | 3.57944357539274  | -0.25316085198348 |
| C | -5.44536431201032 | 3.54958117861034  | -0.29441614326181 |
| C | -6.13207255255058 | 2.35467864046401  | -0.20528786578644 |
| H | -7.66329606093292 | -3.70884509604736 | 0.30502836157090  |
| H | -5.16748801093302 | -3.42712062842430 | 0.31751359070669  |

|   |                   |                   |                   |
|---|-------------------|-------------------|-------------------|
| H | -8.13557195114045 | 0.54636927584045  | -0.07744675954229 |
| H | -9.12202451483474 | -1.69287720375905 | 0.10364403725261  |
| H | -3.54755798224652 | 4.54484808118535  | -0.32922293223317 |
| H | -5.99737155428009 | 4.48670205173431  | -0.39759701375966 |
| H | -7.22176613434421 | 2.35510215548691  | -0.23521187441822 |
| C | -1.81193877812408 | -0.06503858236763 | 0.04634725180231  |
| C | -1.10899288514767 | 1.19685772668755  | -0.00949670621055 |
| C | 0.14316280416054  | -1.27527822186125 | 0.03204469446851  |
| C | 0.31505400438872  | 1.17324903346303  | 0.02563261861817  |
| C | -1.83743324184779 | 2.41524422696289  | -0.05742196247773 |
| C | 0.72122939316211  | -2.56530782869424 | 0.00367753924040  |
| C | 0.96920845674060  | -0.11696149989870 | -0.06906810993230 |
| C | 1.00683401225518  | 2.41525112837535  | 0.17837961711787  |
| C | -1.10824680911970 | 3.60118435087856  | -0.02377724490893 |
| C | 2.07620877272165  | -2.73084196952476 | -0.18318193528517 |
| H | 0.03784074716774  | -3.40973911306311 | 0.10833153108228  |
| C | 2.34844110799390  | -0.32522096755509 | -0.31769620635548 |
| C | 0.27253373739929  | 3.60030091854992  | 0.11344924198402  |
| H | -1.61810320403797 | 4.56399996887847  | -0.05914126501651 |
| C | 2.88588295838970  | -1.59884773623218 | -0.37361567786390 |
| H | 2.51315165562229  | -3.73152085090582 | -0.21335920411644 |
| H | 2.99560944584805  | 0.52235452566414  | -0.53531457033835 |
| H | 0.80329936923017  | 4.55194610748864  | 0.20348107336996  |
| H | 3.95153431868502  | -1.72001467040295 | -0.58250085435237 |
| N | -3.89103989464160 | -1.22999354224318 | 0.13857907769801  |
| N | -1.21030128175095 | -1.21601229931259 | 0.11507293654419  |
| N | 2.36902545153239  | 2.48611847116258  | 0.38375081984676  |
| H | 2.69707947168859  | 3.39031829204886  | 0.69946685223286  |
| H | 2.77907169048565  | 1.72101886982083  | 0.90601979451448  |

2,10-diamino-pBiphe (17), S<sub>0,eq</sub> in vacuum

|   |                   |                   |                  |
|---|-------------------|-------------------|------------------|
| C | -7.22696495212107 | -2.70727760066578 | 0.20761394789882 |
| C | -5.85615372746305 | -2.56899625456808 | 0.23174694833713 |



|   |                   |                   |                   |
|---|-------------------|-------------------|-------------------|
| C | -5.25546498693044 | -1.29176036959920 | 0.12759848310069  |
| C | -6.07997180883757 | -0.14075367891009 | -0.00277536417261 |
| C | -7.47983427377513 | -0.31188255204937 | -0.02621044540349 |
| C | -8.04437824338339 | -1.56860183931781 | 0.07703534610279  |
| C | -5.42190688378566 | 1.14300855461027  | -0.10101431100639 |
| C | -4.00327636578050 | 1.17076614365978  | -0.05328614305609 |
| C | -3.29623822092456 | -0.08014914295533 | 0.06774967745072  |
| C | -3.29585790981339 | 2.40244013989380  | -0.12676591450902 |
| C | -4.03528488158851 | 3.57517428002612  | -0.27223151230808 |
| C | -5.43170903894410 | 3.54898553316703  | -0.32925178797103 |
| C | -6.12276561360374 | 2.35621005376620  | -0.24068290762348 |
| H | -7.68131317920068 | -3.69760647417155 | 0.28873793594607  |
| H | -5.18535860365135 | -3.42430881733127 | 0.32972679785971  |
| H | -8.13287840973518 | 0.55663751769247  | -0.12559623833844 |
| H | -9.13126213509724 | -1.67765818777070 | 0.05729318975294  |
| H | -3.53123999492847 | 4.53861613765258  | -0.34886784950921 |
| H | -5.98006640429054 | 4.48690406442833  | -0.44474684045249 |
| H | -7.21207396176204 | 2.35936889746329  | -0.28338123465861 |
| C | -1.81535242063316 | -0.07146039807612 | 0.07882822788108  |
| C | -1.10685624063406 | 1.18513870933463  | 0.01936856256580  |
| C | 0.13811057920472  | -1.28135860618813 | 0.10117071989591  |
| C | 0.31809071935822  | 1.16060341624835  | 0.06692112765063  |
| C | -1.83016030712375 | 2.40657375625420  | -0.04501060222217 |
| C | 0.72742115770947  | -2.56840472804083 | 0.09730567079579  |
| C | 0.97465794591910  | -0.13049478027666 | -0.01159296509132 |
| C | 1.00893208452250  | 2.40265124358893  | 0.21766561803308  |
| C | -1.09933143639812 | 3.59140719357550  | -0.01228910187549 |
| C | 2.07698950104180  | -2.74066478995343 | -0.07657364057205 |
| H | 0.05089801346671  | -3.41683567954233 | 0.21410811652084  |
| C | 2.35258902737728  | -0.33483891410212 | -0.23790379883531 |
| C | 0.28021933096485  | 3.58978647280075  | 0.13868271880813  |
| H | -1.60763504633914 | 4.55459599511093  | -0.05987211655408 |
| C | 2.91172992338259  | -1.61398025066979 | -0.28538539339493 |

|   |                   |                   |                   |
|---|-------------------|-------------------|-------------------|
| H | 2.51099141052758  | -3.74396673602171 | -0.09292762428938 |
| H | 2.99920883933087  | 0.51095753566942  | -0.46825749713593 |
| H | 0.81262908356518  | 4.54058515837534  | 0.22830025702524  |
| N | -3.89735503001219 | -1.23384134411120 | 0.15282440230452  |
| N | -1.21027691893403 | -1.22242097582022 | 0.16679913809105  |
| N | 2.37082609687680  | 2.47047711937354  | 0.44032045991129  |
| H | 2.68887085044727  | 3.37293049211942  | 0.77171583270049  |
| H | 2.76025134106051  | 1.70356314548314  | 0.97666620617449  |
| N | 4.23978177545313  | -1.79355278335959 | -0.57802510743602 |
| H | 4.85937998964808  | -1.00009725591009 | -0.50033189908745 |
| H | 4.65768932583460  | -2.68786940088266 | -0.36569908930411 |

[2-amino-pBiphe-H]<sup>+</sup> (**18**), S<sub>0,eq</sub> in vacuum

|   |                  |                  |                   |
|---|------------------|------------------|-------------------|
| N | 1.30508264783736 | 0.01728036796528 | -1.39610028522763 |
| C | 1.45216396008399 | 0.04286164965710 | 1.02664867636297  |
| C | 0.73661155200059 | 0.01382805929176 | -0.20802445619935 |
| C | 3.50000656997206 | 0.08175979789193 | -0.33602178003573 |
| C | 0.75806860176698 | 0.03671867959450 | 2.26696158865269  |
| C | 2.86775091369091 | 0.07770612768943 | 0.96889013491231  |
| C | 2.64188716759362 | 0.04987037390172 | -1.48959956995860 |
| C | 3.58407518800907 | 0.10650774530562 | 2.18055381326276  |
| H | 4.67386207308829 | 0.13359910290384 | 2.17634016525990  |
| C | 4.88113822547034 | 0.11465281431725 | -0.52458013855513 |
| H | 5.55169955846814 | 0.13918002905092 | 0.33537058234707  |
| C | 1.51474922735463 | 0.06620963266073 | 3.43552452664571  |
| H | 1.02779187862565 | 0.06292233235498 | 4.41087384722497  |
| C | 4.58301970665547 | 0.08530981149922 | -2.94731667744090 |
| H | 5.02016884680002 | 0.08721043359097 | -3.94855219148829 |
| C | 3.22864767456493 | 0.05285936471180 | -2.78558231090906 |
| H | 2.55737288443758 | 0.02834173088167 | -3.64551857905991 |
| C | 5.44696829942687 | 0.11721927770243 | -1.80930567880876 |
| C | 2.91325388100739 | 0.10070767139031 | 3.38943664350185  |
| H | 3.47819610864349 | 0.12325055574949 | 4.32327874265830  |

|   |                   |                   |                   |
|---|-------------------|-------------------|-------------------|
| N | -1.34936097220239 | -0.04843290581915 | -1.33870408364758 |
| C | -1.42736542755368 | -0.02895027755552 | 1.04191183123458  |
| C | -0.70534717273487 | -0.02192086427769 | -0.17852937744485 |
| C | -3.51042055079345 | -0.09300721294763 | -0.30124470132860 |
| C | -0.71123882483307 | 0.00003349141308  | 2.27503095124722  |
| C | -2.85095074613667 | -0.06491385540942 | 0.99434467384188  |
| C | -2.71683224258655 | -0.08376811511455 | -1.47334554193685 |
| C | -3.54993654752926 | -0.07144546321412 | 2.20968109710839  |
| H | -4.63900993585794 | -0.09847066607034 | 2.22237679837173  |
| C | -4.90819760170209 | -0.12932825476820 | -0.46746047480749 |
| H | -5.55737377520436 | -0.13761577365551 | 0.40810558865332  |
| C | -1.46100354282719 | -0.00818904556460 | 3.44871135531782  |
| H | -0.96748059989384 | 0.01280026850391  | 4.41994669443969  |
| C | -4.66870157521910 | -0.14501609520725 | -2.87467925319596 |
| H | -5.12508596990885 | -0.16531439737070 | -3.86619367191345 |
| C | -3.29320057690081 | -0.10963830241900 | -2.75222605412236 |
| H | -2.64982027750973 | -0.10155195152175 | -3.63496848975740 |
| C | -5.47793934673032 | -0.15484898760804 | -1.72727028112262 |
| H | -6.56427982177581 | -0.18279952600520 | -1.82953722321102 |
| C | -2.85734205356976 | -0.04341261528962 | 3.40999176605741  |
| H | -3.41422240134413 | -0.04890030646474 | 4.34944490098723  |
| N | 6.78183838029096  | 0.14867081103105  | -1.98783439382770 |
| H | 7.18386008904608  | 0.15214156960447  | -2.91386153385608 |
| H | 7.41565968231165  | 0.17349833897216  | -1.20233708109537 |
| H | -0.73346315433223 | -0.04051542135260 | -2.15763054913709 |

[10-amino-pBiphe-H]<sup>+</sup> (**19**), S<sub>0,eq</sub> in vacuum

|   |                  |                   |                   |
|---|------------------|-------------------|-------------------|
| N | 1.32403545140771 | 0.15905777765051  | -1.32962080725408 |
| C | 1.46951263542202 | 0.05014808571078  | 1.09336594408465  |
| C | 0.76540510679949 | 0.07596870382275  | -0.15118079814550 |
| C | 3.51453546722304 | 0.05961119359016  | -0.26287553256212 |
| C | 0.74583631621899 | -0.03201890627622 | 2.30993715528014  |
| C | 2.88875656914062 | 0.13277856500197  | 1.03759218153356  |

|   |                   |                   |                   |
|---|-------------------|-------------------|-------------------|
| C | 2.67240207363606  | 0.13166778873075  | -1.42357866588109 |
| C | 3.59127560680030  | 0.29565775651954  | 2.28158843578609  |
| C | 4.89783002180589  | -0.14162157536809 | -0.49377389627661 |
| H | 5.56710030153824  | -0.34496732867890 | 0.33971008923040  |
| C | 1.49358286151274  | -0.01369260527458 | 3.48997610736526  |
| H | 1.00051223276490  | -0.09326855948498 | 4.45916484938079  |
| C | 4.58935727798829  | -0.00350913081014 | -2.90106699525481 |
| H | 5.01999735246673  | -0.01286828663119 | -3.90411560482372 |
| C | 3.23337846852675  | 0.13110410476392  | -2.72388240840231 |
| H | 2.54655016812938  | 0.21319389038699  | -3.56779324472617 |
| C | 5.41620149262858  | -0.17380489213417 | -1.77402975214887 |
| C | 2.86711768396564  | 0.15890267200066  | 3.47494054812376  |
| H | 3.40558916434605  | 0.23238439987497  | 4.42266631694516  |
| N | -1.31007946787796 | 0.07405086409660  | -1.30730083116410 |
| C | -1.42105443269008 | -0.07723613456968 | 1.06317990663206  |
| C | -0.69018545989018 | 0.02794431018854  | -0.13695272569342 |
| C | -3.48394596272692 | -0.08362522759474 | -0.30884194479740 |
| C | -0.71169625881298 | -0.11998754626734 | 2.30263109032959  |
| C | -2.84651095076283 | -0.14174266646319 | 0.99514982954853  |
| C | -2.67409513991163 | 0.02747718747748  | -1.46572588345941 |
| C | -3.55630725719640 | -0.25942882368468 | 2.19541463179126  |
| H | -4.64429762618644 | -0.31418142762850 | 2.19615228150068  |
| C | -4.87876261112953 | -0.13163280598524 | -0.49993315386862 |
| H | -5.53990205840764 | -0.21632980542706 | 0.36247850956153  |
| C | -1.47745347690355 | -0.24170701888853 | 3.46266740477241  |
| H | -0.99724966075956 | -0.28640597654373 | 4.43976560659210  |
| C | -4.60296716194324 | 0.03760377156546  | -2.89858655736592 |
| H | -5.04524034254224 | 0.08380455664944  | -3.89559113470853 |
| C | -3.23090590148688 | 0.08746702751888  | -2.75270902260306 |
| H | -2.57500258424040 | 0.17276414727038  | -3.62203777315427 |
| C | -5.42836178730361 | -0.07224597875145 | -1.76690663268597 |
| H | -6.51242587371933 | -0.11094495407269 | -1.88866878541997 |
| C | -2.87037490939173 | -0.30998739097826 | 3.40163879365928  |

|   |                   |                   |                   |
|---|-------------------|-------------------|-------------------|
| H | -3.43535268971366 | -0.40486962069074 | 4.33161847805443  |
| H | -0.67796780165000 | 0.14535774841337  | -2.11189041269179 |
| H | 6.48565259347062  | -0.34897940466047 | -1.91076855984941 |
| N | 4.92014525259963  | 0.57619894134996  | 2.34449271989320  |
| H | 5.35975677025881  | 1.04826065263566  | 1.56608462972751  |
| H | 5.29870854659633  | 0.81345192164578  | 3.25241561314475  |

[2-amino-pBiphe-Me]<sup>+</sup> (**20**), S<sub>0,eq</sub> in vacuum

|   |                   |                   |                   |
|---|-------------------|-------------------|-------------------|
| N | 1.38503771573286  | -0.06815148316778 | -1.41287188866985 |
| C | 1.46820350270954  | 0.17429139425496  | 0.98639184314918  |
| C | 0.76165926359901  | 0.10697258626877  | -0.26239736669443 |
| C | 3.55701115714764  | 0.03728063371273  | -0.31443303639502 |
| C | 0.76936556622611  | 0.20390817865645  | 2.21806665190598  |
| C | 2.88759250136693  | 0.18654100129022  | 0.96068565981154  |
| C | 2.71976389634987  | -0.12667678084680 | -1.46740025932841 |
| C | 3.58390384003639  | 0.31451184884492  | 2.17617369559103  |
| H | 4.67368775870099  | 0.33790663315896  | 2.18377246845535  |
| C | 4.94135949813818  | 0.01956797737135  | -0.47385629092308 |
| H | 5.59733887470065  | 0.14943592354159  | 0.38790859249529  |
| C | 1.50276631556296  | 0.33591599557755  | 3.39639554278399  |
| H | 0.99746590213771  | 0.38314192634937  | 4.36079213287163  |
| C | 4.68636800678865  | -0.35946562841196 | -2.87366161270358 |
| H | 5.14221197405266  | -0.51790693818920 | -3.85381251952283 |
| C | 3.32927350633296  | -0.33494559612467 | -2.73777280955880 |
| H | 2.67229523589853  | -0.47069229187340 | -3.59840975252466 |
| C | 5.52963831551186  | -0.17462841242264 | -1.73427410880242 |
| C | 2.89760285011791  | 0.40505789004473  | 3.37279173446450  |
| H | 3.44700619622705  | 0.51282582151957  | 4.30988086423728  |
| N | -1.38671436776420 | 0.35581132094789  | -1.40954834839292 |
| C | -1.39580784963694 | 0.00119397496434  | 0.96833498560060  |
| C | -0.69189147035612 | 0.16378393049423  | -0.26760007174519 |
| C | -3.48294546966081 | -0.23355862464160 | -0.32103461847672 |
| C | -0.68537320164685 | 0.04891385866798  | 2.20711839950974  |

|   |                   |                   |                   |
|---|-------------------|-------------------|-------------------|
| C | -2.80978495042778 | -0.15423244274269 | 0.95763783957472  |
| C | -2.74768456947746 | 0.04182844264558  | -1.49513879072475 |
| C | -3.49720369851083 | -0.24476394301743 | 2.17479603584440  |
| H | -4.58140429340508 | -0.34720967787814 | 2.18870497504126  |
| C | -4.84585304760834 | -0.56447887793745 | -0.44568974886754 |
| H | -5.42608631799234 | -0.79471029490641 | 0.44738225659243  |
| C | -1.41836086675694 | -0.05171166091567 | 3.38840922534071  |
| H | -0.91011644582015 | -0.02299266959565 | 4.35124805294220  |
| C | -4.72170976216897 | -0.35198601937688 | -2.83763183065225 |
| H | -5.19471565232118 | -0.41495883884456 | -3.81958508032743 |
| C | -3.38173103025126 | -0.02274856605732 | -2.75050388246105 |
| H | -2.82180112415886 | 0.14930144351638  | -3.66723625488131 |
| C | -5.46262992641100 | -0.62030911529665 | -1.68001735249373 |
| H | -6.51923189113444 | -0.88414649741747 | -1.75197661163852 |
| C | -2.80455675996561 | -0.19370533455158 | 3.37215780632215  |
| H | -3.34848738509503 | -0.26520550676804 | 4.31627721517866  |
| C | -0.78750548818130 | 0.98409686463941  | -2.58915402236837 |
| H | 0.08120511084223  | 1.57123315844111  | -2.28758347182290 |
| H | -0.45859011542770 | 0.24103957834052  | -3.32563773750353 |
| H | -1.54098810865123 | 1.64983143398438  | -3.02626177085805 |
| N | 6.86752525711249  | -0.19327530167151 | -1.88710166908472 |
| H | 7.28650525657603  | -0.34064640092337 | -2.79373617066415 |
| H | 7.48718629096121  | -0.06948491365411 | -1.09959889962642 |

[10-amino-pBiphe-Me]<sup>+</sup> (**21**), S<sub>0,eq</sub> in vacuum

|   |                  |                   |                   |
|---|------------------|-------------------|-------------------|
| N | 1.40728706861652 | -0.01666390845192 | -1.35670358285298 |
| C | 1.48853541763869 | 0.14398366696107  | 1.05186390876943  |
| C | 0.79524618828811 | 0.11855044909369  | -0.20801809711348 |
| C | 3.57015880819045 | -0.06713480773330 | -0.23048639168603 |
| C | 0.76045658945093 | 0.11026988794929  | 2.26143914736989  |
| C | 2.91133253902965 | 0.19725639972803  | 1.02515930149109  |
| C | 2.74840414361662 | -0.15895190427347 | -1.40068180621156 |
| C | 3.58936620060253 | 0.48332397164819  | 2.25936382419416  |

|   |                   |                   |                   |
|---|-------------------|-------------------|-------------------|
| C | 4.95134512618038  | -0.33561268990197 | -0.39577467156657 |
| H | 5.60481625903360  | -0.40106635812812 | 0.47165285438207  |
| C | 1.48069955956266  | 0.24417826454532  | 3.45263359845252  |
| H | 0.96820214066606  | 0.22722481700991  | 4.41461176066470  |
| C | 4.67670894163104  | -0.62971647904758 | -2.79438690152811 |
| H | 5.11936721151955  | -0.83695215744695 | -3.77047602091895 |
| C | 3.32493664424728  | -0.41851704138147 | -2.66935750445766 |
| H | 2.65137737267711  | -0.46467566346515 | -3.52654431420645 |
| C | 5.48388356715318  | -0.61153894348181 | -1.64045743007745 |
| H | 6.54974064374341  | -0.83554774862438 | -1.72426195409234 |
| C | 2.84695368939062  | 0.45764074719528  | 3.44883292963419  |
| H | 3.36591803301109  | 0.63123648390155  | 4.39434404096844  |
| N | -1.34468344723151 | 0.45656874044997  | -1.36102400657799 |
| C | -1.38187623061047 | -0.07289040631465 | 0.98064186135958  |
| C | -0.67252857946326 | 0.18990019889523  | -0.22368937114336 |
| C | -3.45114133976631 | -0.22410624624918 | -0.34553025856405 |
| C | -0.67729043325733 | -0.10092039557604 | 2.22696182975775  |
| C | -2.79642933411989 | -0.24911777598512 | 0.94351647613702  |
| C | -2.70490301002154 | 0.15345823636262  | -1.48530202977324 |
| C | -3.48934717623854 | -0.45633582829159 | 2.14026733729945  |
| H | -4.57094155947658 | -0.58275414974404 | 2.13921418119719  |
| C | -4.81213438668223 | -0.54675664372868 | -0.51312652532550 |
| H | -5.40035939774574 | -0.85309188654064 | 0.35131372693728  |
| C | -1.42030463170930 | -0.31947269691365 | 3.38850993772240  |
| H | -0.92147158708465 | -0.36114511657793 | 4.35598629114062  |
| C | -4.66401955616807 | -0.12752984056095 | -2.87675573594531 |
| H | -5.12749456692492 | -0.10642367020610 | -3.86500213857829 |
| C | -3.32688413535463 | 0.19674755938135  | -2.74829648703071 |
| H | -2.75975923571069 | 0.44952095538015  | -3.64145604503990 |
| C | -5.41551132899454 | -0.49743971330609 | -1.75353435775778 |
| H | -6.47052622588908 | -0.75636451954745 | -1.85918945050598 |
| C | -2.80085123803723 | -0.49369608382630 | 3.34345928483599  |
| H | -3.34939049760436 | -0.66022916707205 | 4.27301061643474  |

|   |                   |                  |                   |
|---|-------------------|------------------|-------------------|
| N | 4.91747942093775  | 0.77052659506977 | 2.31436300422768  |
| H | 5.36805069701235  | 1.16867570432779 | 1.50160138068231  |
| H | 5.28532795710044  | 1.08820945803296 | 3.20180980991848  |
| C | -0.72545023960783 | 1.15988480901572 | -2.48812715789714 |
| H | 0.15189943100157  | 1.70756527474052 | -2.14223307481730 |
| H | -0.40830983544306 | 0.46535106696185 | -3.27526078560388 |
| H | -1.46398567715986 | 1.87017855572637 | -2.87778100430492 |

2-dimethylamino-pBiphe (**22**), S<sub>0,eq</sub> in vacuum

|   |                   |                   |                   |
|---|-------------------|-------------------|-------------------|
| N | 1.23739617545796  | -0.12652041786682 | -1.54062890555487 |
| C | 1.42249500117013  | 0.15787207489689  | 0.84793035550573  |
| C | 0.67095576093237  | -0.01507790061778 | -0.37041756881652 |
| C | 3.45815394262635  | 0.08373192843149  | -0.53623747967344 |
| C | 0.76666294959225  | 0.27575473406881  | 2.10526466002073  |
| C | 2.83992432503588  | 0.20889668604278  | 0.76728358587501  |
| C | 2.58587822544317  | -0.08174365539032 | -1.64677265451050 |
| C | 3.58305615332212  | 0.37840378904051  | 1.95127023648098  |
| H | 4.67187824232565  | 0.42033619383347  | 1.91209989923139  |
| C | 4.84562310161932  | 0.11764450290401  | -0.74537217143347 |
| H | 5.50343427474611  | 0.24382410654652  | 0.11118913583360  |
| C | 1.54720985478142  | 0.44223292726068  | 3.24592843059116  |
| H | 1.07829765565374  | 0.53656721173144  | 4.22525032328907  |
| C | 4.51361320091996  | -0.17237266986325 | -3.12887285751746 |
| H | 4.90715678619198  | -0.27297594950857 | -4.13969347160601 |
| C | 3.15577665434339  | -0.20717903570647 | -2.93584620901955 |
| H | 2.46643357961749  | -0.33340288723703 | -3.77262841067047 |
| C | 5.40287270207291  | -0.00687629553013 | -2.02583596964393 |
| C | 2.94252522944667  | 0.49299022643391  | 3.16887727297544  |
| H | 3.52666954001888  | 0.62463588710454  | 4.08246425292275  |
| N | -1.45808861897063 | -0.22696562779838 | -1.42639040738721 |
| C | -1.45729489512904 | 0.04986815119950  | 0.97449332688986  |
| C | -0.80581623295695 | -0.07049056600486 | -0.30909916921527 |
| C | -3.58933166683905 | -0.17994389027530 | -0.22868669404961 |



|   |                   |                   |                   |
|---|-------------------|-------------------|-------------------|
| C | -0.70373696169817 | 0.21967985438468  | 2.16924156798915  |
| C | -2.87529251821694 | -0.00575836302057 | 1.01658602946794  |
| C | -2.81638062779429 | -0.28386650704964 | -1.41720491920838 |
| C | -3.52528229263622 | 0.10996754523057  | 2.26066426087318  |
| H | -4.61335910094392 | 0.07047670211359  | 2.31552163915060  |
| C | -4.99436121937998 | -0.25180686483094 | -0.32842352840319 |
| H | -5.60972468646256 | -0.17486813159125 | 0.56936927322190  |
| C | -1.39348993239224 | 0.32831992361686  | 3.37411704963934  |
| H | -0.85027168159197 | 0.45836102341238  | 4.30990396361969  |
| C | -4.84539403295944 | -0.52211946999689 | -2.72891627483332 |
| H | -5.34201546917185 | -0.65459090397972 | -3.69300944438462 |
| C | -3.47074769872838 | -0.45519822336459 | -2.66017462632225 |
| H | -2.83790564840880 | -0.53021943006470 | -3.54614572992038 |
| C | -5.61210103430069 | -0.41948710194548 | -1.55279378708108 |
| H | -6.70193359355310 | -0.47257375895094 | -1.60677644551414 |
| C | -2.78992396138375 | 0.27400706252100  | 3.41757750725785  |
| H | -3.30055483169311 | 0.36270380323642  | 4.37920049098471  |
| N | 6.76052385038017  | 0.02790745905910  | -2.22295404234918 |
| C | 7.30811612705383  | -0.10861864397780 | -3.54742322903869 |
| H | 6.96796545041828  | 0.69422796327623  | -4.22572170987021 |
| H | 8.40207562713794  | -0.05447355050018 | -3.49279915194562 |
| H | 7.04458970210544  | -1.07544212164078 | -4.01265488132849 |
| C | 7.63979334201217  | 0.19212296223714  | -1.09721877330400 |
| H | 8.68006056032185  | 0.20015057970881  | -1.44403454973959 |
| H | 7.45570813953741  | 1.14166676915678  | -0.56226322489501 |
| H | 7.53506055092615  | -0.62887810073572 | -0.36433697458361 |

[2-dimethylamino-pBiphe-H]<sup>+</sup> (**23**), S<sub>0,eq</sub> in vacuum

|   |                  |                   |                   |
|---|------------------|-------------------|-------------------|
| N | 1.22342871663171 | -0.11781068777943 | -1.49852025927674 |
| C | 1.43631641940225 | 0.16333410693232  | 0.90410948102878  |
| C | 0.68707271851011 | -0.00446108689786 | -0.29944695087398 |
| C | 3.44557152163528 | 0.08658711138824  | -0.51514705308601 |
| C | 0.77654481305511 | 0.27779997799644  | 2.15786626177319  |

|   |                   |                   |                   |
|---|-------------------|-------------------|-------------------|
| C | 2.84919291322503  | 0.21102303097752  | 0.80211976258887  |
| C | 2.55540529102672  | -0.07711863621493 | -1.63194339354919 |
| C | 3.59676039600612  | 0.37640407624043  | 1.98298538542859  |
| H | 4.68552355961715  | 0.41765810991861  | 1.94488336312637  |
| C | 4.81967426461019  | 0.11804699441619  | -0.74262025381016 |
| H | 5.49022034172285  | 0.24175262067087  | 0.10361095036460  |
| C | 1.56407323853745  | 0.44011110980463  | 3.29511654592451  |
| H | 1.10370542639435  | 0.53258642518242  | 4.27895759371037  |
| C | 4.46041684495159  | -0.16794769065670 | -3.13881906163884 |
| H | 4.84524131266186  | -0.26609833503344 | -4.15253778818803 |
| C | 3.11171623513085  | -0.20115009759503 | -2.93414815298446 |
| H | 2.42046492879287  | -0.32435108760160 | -3.76956070401562 |
| C | 5.36563048352252  | -0.00584579244794 | -2.03799875394960 |
| C | 2.95955309726075  | 0.48852056624805  | 3.20522539336681  |
| H | 3.54956689541364  | 0.61663107503918  | 4.11475323092347  |
| N | -1.42695606971852 | -0.21310080907839 | -1.35745122211308 |
| C | -1.43970386617031 | 0.05463934607559  | 1.01015822897015  |
| C | -0.75099172864383 | -0.05632828880501 | -0.22501340376601 |
| C | -3.55759831676123 | -0.17791452991498 | -0.25827703919533 |
| C | -0.69093203905363 | 0.22203778414917  | 2.21222228058296  |
| C | -2.86312311316343 | -0.00553704417410 | 1.00799791918808  |
| C | -2.79678817030417 | -0.28072546411360 | -1.44737903656959 |
| C | -3.52834500700971 | 0.10528788485621  | 2.23690737466272  |
| H | -4.61607716913625 | 0.06482299012133  | 2.28372453121306  |
| C | -4.95850341907467 | -0.25012006427417 | -0.37887687957363 |
| H | -5.58283143763079 | -0.17524355070272 | 0.51149479989130  |
| C | -1.40819816319625 | 0.32601573247019  | 3.40199762802589  |
| H | -0.88845214626790 | 0.45474397544573  | 4.35099013036848  |
| C | -4.78596123243445 | -0.51465324844566 | -2.77695325963314 |
| H | -5.26902851380030 | -0.64478399634388 | -3.74727946803680 |
| C | -3.40824210467908 | -0.44810582270014 | -2.69897070494042 |
| H | -2.78975657683070 | -0.52373022590062 | -3.59618593096450 |
| C | -5.56286501957358 | -0.41512346742173 | -1.61188046598013 |

|   |                   |                   |                   |
|---|-------------------|-------------------|-------------------|
| H | -6.65102190673406 | -0.46812303970292 | -1.67865721250867 |
| C | -2.80390893503761 | 0.26790950163578  | 3.40765487465408  |
| H | -3.33492261734811 | 0.35275638890633  | 4.35819855829432  |
| N | 6.70298070167574  | 0.02614275551710  | -2.24755477568047 |
| C | 7.24622046902333  | -0.10276552428479 | -3.58372767392473 |
| H | 6.90452399028349  | 0.71055481813399  | -4.24477980501320 |
| H | 8.33918276404746  | -0.05486754930479 | -3.53230152850668 |
| H | 6.97328528734620  | -1.06586267091361 | -4.04528819035046 |
| C | 7.60721875817175  | 0.19164432365283  | -1.13164275254699 |
| H | 8.63934187947959  | 0.19429340871065  | -1.49784705774334 |
| H | 7.43187567289773  | 1.14470633825120  | -0.60480798869609 |
| H | 7.50799687140909  | -0.63058434675238 | -0.40312747679353 |
| H | -0.83409825987429 | -0.28275739568057 | -2.19013005017716 |

[2-dimethylamino-pBiphe-H]<sup>+</sup> (**23**), S<sub>0,eq</sub> in chloroform

|   |                  |                   |                   |
|---|------------------|-------------------|-------------------|
| N | 1.22671942828139 | -0.12134185054227 | -1.50165761687337 |
| C | 1.43532171022939 | 0.16168530948080  | 0.89873935593427  |
| C | 0.68558782537894 | -0.00829531174830 | -0.30559175056421 |
| C | 3.44884081234267 | 0.08404304854304  | -0.51747482621367 |
| C | 0.77634832651207 | 0.27878117415507  | 2.15303901527899  |
| C | 2.84906030300549 | 0.20978518422720  | 0.79893445281632  |
| C | 2.55941762134246 | -0.07985382255834 | -1.63406583852505 |
| C | 3.59787494039236 | 0.37790501494487  | 1.97911901022644  |
| H | 4.68700082008431 | 0.41838011283516  | 1.94028043271730  |
| C | 4.82382318047931 | 0.11633199482264  | -0.74119103139414 |
| H | 5.49377679681688 | 0.23979783263497  | 0.10613654085079  |
| C | 1.56300880913860 | 0.44673043943432  | 3.29082521674669  |
| H | 1.10220028881261 | 0.54476653119911  | 4.27407163934794  |
| C | 4.46624402410012 | -0.16722227803861 | -3.14044731780152 |
| H | 4.85280427139374 | -0.26347196278685 | -4.15417669131441 |
| C | 3.11668819729583 | -0.20203977489095 | -2.93630606591382 |
| H | 2.42726661216402 | -0.32476728760247 | -3.77423303667463 |
| C | 5.37058719871115 | -0.00639654147963 | -2.03772920715072 |

|   |                   |                   |                   |
|---|-------------------|-------------------|-------------------|
| C | 2.95875197900123  | 0.49446941456600  | 3.20044509561693  |
| H | 3.54835456936145  | 0.62606580566878  | 4.11022346791885  |
| N | -1.43403893476448 | -0.21725178690503 | -1.35932963441454 |
| C | -1.44083377667437 | 0.05395792204110  | 1.00640879868683  |
| C | -0.75422083227098 | -0.05952387913090 | -0.23184405825450 |
| C | -3.56256241579872 | -0.17663288297974 | -0.25499965110490 |
| C | -0.69162062797693 | 0.22050084300097  | 2.20817001674320  |
| C | -2.86422001105564 | -0.00465917434469 | 1.00900147256216  |
| C | -2.80271500822364 | -0.28245279416736 | -1.44393203735645 |
| C | -3.52855580262508 | 0.10547254548050  | 2.23944807476314  |
| H | -4.61668556019505 | 0.06746833473319  | 2.28730630438762  |
| C | -4.96459257381704 | -0.24577682111512 | -0.37342532797228 |
| H | -5.58858921266464 | -0.16972900203923 | 0.51745770234956  |
| C | -1.40534876150598 | 0.32011398850212  | 3.40097206823848  |
| H | -0.88358736403276 | 0.44351631941413  | 4.34992610621327  |
| C | -4.79145711284816 | -0.51335594291564 | -2.77338353674079 |
| H | -5.27531486270349 | -0.64348050917829 | -3.74385450204799 |
| C | -3.41352000253978 | -0.45080477724721 | -2.69650040332363 |
| H | -2.78866713917250 | -0.52899372093965 | -3.58904499496013 |
| C | -5.56814799524838 | -0.41023478468537 | -1.60749708870743 |
| H | -6.65698214679091 | -0.46032784325685 | -1.67388803036527 |
| C | -2.80140043196282 | 0.26339562529694  | 3.40892709485478  |
| H | -3.33029612005162 | 0.34567965954575  | 4.36120401143300  |
| N | 6.70653499170688  | 0.02588837657633  | -2.24471052294464 |
| C | 7.25273516415807  | -0.09905734411960 | -3.57956865783098 |
| H | 6.90974476521997  | 0.71471239680866  | -4.23967486888564 |
| H | 8.34564892047996  | -0.04974682800598 | -3.52338420114728 |
| H | 6.98013770252540  | -1.06054057201230 | -4.04504515636167 |
| C | 7.60951029599017  | 0.18888382712164  | -1.12739602983697 |
| H | 8.64135112330369  | 0.19469494684557  | -1.49503987731897 |
| H | 7.43053740878868  | 1.13858020425838  | -0.59563362830447 |
| H | 7.50971891117880  | -0.63477578246535 | -0.40053861342492 |
| H | -0.86184030527276 | -0.28997357698149 | -2.20697167395748 |

[2-dimethylamino-pBiphe-H]<sup>+</sup> (**23**), S<sub>0,eq</sub> in methanol

|   |                   |                   |                   |
|---|-------------------|-------------------|-------------------|
| N | 1.22742892369049  | -0.12168260215152 | -1.50524741078341 |
| C | 1.43461581150340  | 0.16150852358062  | 0.89476865594821  |
| C | 0.68478649455812  | -0.00880836180051 | -0.30973607758829 |
| C | 3.44942325590652  | 0.08383196436883  | -0.51959715367407 |
| C | 0.77625694963816  | 0.27911032564426  | 2.14926843470554  |
| C | 2.84845194897471  | 0.20967664242585  | 0.79603736631760  |
| C | 2.56082874979001  | -0.07991834441683 | -1.63622928544162 |
| C | 3.59772584006235  | 0.37811265293692  | 1.97586312540123  |
| H | 4.68708799674663  | 0.41811990873461  | 1.93758090745738  |
| C | 4.82480484715560  | 0.11636242109076  | -0.74079478515684 |
| H | 5.49386165664644  | 0.23986017939269  | 0.10753279753038  |
| C | 1.56238136767320  | 0.44841429267606  | 3.28726167720382  |
| H | 1.10184645026397  | 0.54792963146821  | 4.27064329695766  |
| C | 4.46971145534496  | -0.16643783227651 | -3.14068318308696 |
| H | 4.85674209658672  | -0.26221932974229 | -4.15452820222249 |
| C | 3.11977870242688  | -0.20149129058626 | -2.93770717425231 |
| H | 2.43281603049628  | -0.32402024975919 | -3.77799712558551 |
| C | 5.37276997581261  | -0.00618611757581 | -2.03695330257265 |
| C | 2.95810467099570  | 0.49581854726173  | 3.19684124663207  |
| H | 3.54765965513893  | 0.62814112353352  | 4.10679750923837  |
| N | -1.43735857651784 | -0.21799479242038 | -1.36139254233716 |
| C | -1.44085582638790 | 0.05391003971780  | 1.00372247274023  |
| C | -0.75540057693610 | -0.05998486074369 | -0.23565668548337 |
| C | -3.56438531329275 | -0.17625705694492 | -0.25344555651307 |
| C | -0.69133413848546 | 0.22006325321867  | 2.20505553064985  |
| C | -2.86405246429567 | -0.00442259268032 | 1.00882780528182  |
| C | -2.80608691303758 | -0.28275350827138 | -1.44271832326832 |
| C | -3.52753496585095 | 0.10526156167128  | 2.23990231815388  |
| H | -4.61579933441875 | 0.06786143165333  | 2.28936957897487  |
| C | -4.96675062702687 | -0.24474719708850 | -0.36947997526307 |
| H | -5.59023278462578 | -0.16840402785733 | 0.52195986214150  |

|   |                   |                   |                   |
|---|-------------------|-------------------|-------------------|
| C | -1.40305227119593 | 0.31823805844276  | 3.39912604116071  |
| H | -0.88062775300599 | 0.44008130609404  | 4.34812078550962  |
| C | -4.79577909851354 | -0.51331185965486 | -2.76990779213923 |
| H | -5.28069692246164 | -0.64365206296227 | -3.74008250237125 |
| C | -3.41783131771148 | -0.45156306728432 | -2.69473334056466 |
| H | -2.79252712880110 | -0.53048617958944 | -3.58699011371697 |
| C | -5.57126739301359 | -0.40925013618474 | -1.60311454271291 |
| H | -6.66045505226340 | -0.45872808548597 | -1.66825747768662 |
| C | -2.79910040857359 | 0.26179049587945  | 3.40855431346985  |
| H | -3.32699120161422 | 0.34318593593533  | 4.36166002225201  |
| N | 6.70855366981756  | 0.02578579196177  | -2.24212311566369 |
| C | 7.25640006210578  | -0.09855370651960 | -3.57659127372300 |
| H | 6.91435024761818  | 0.71572515378565  | -4.23660588208665 |
| H | 8.34933030094706  | -0.04969690332026 | -3.51868859051627 |
| H | 6.98376975051394  | -1.05954500347266 | -4.04311528945005 |
| C | 7.61011120652904  | 0.18806064266889  | -1.12311667676465 |
| H | 8.64240810417928  | 0.19448706939834  | -1.48969975597674 |
| H | 7.42994445364873  | 1.13703712150137  | -0.59049285523164 |
| H | 7.50935074219736  | -0.63602509869314 | -0.39689697766183 |
| H | -0.87278134893862 | -0.29133380756004 | -2.21421077823126 |

[2-dimethylamino-pBiphe-H]<sup>+</sup> (**23**), S<sub>0,eq</sub> in dimethyl sulfoxide

|   |                  |                   |                   |
|---|------------------|-------------------|-------------------|
| N | 1.22781167622338 | -0.12173668044485 | -1.50397273259046 |
| C | 1.43507645275272 | 0.16154273394306  | 0.89585728336676  |
| C | 0.68529640181290 | -0.00885575132569 | -0.30882843631062 |
| C | 3.44976896118074 | 0.08382116824265  | -0.51876795185740 |
| C | 0.77643685701971 | 0.27915869916171  | 2.15014585591811  |
| C | 2.84886656481022 | 0.20972412885608  | 0.79697939774720  |
| C | 2.56080453087519 | -0.08003315788299 | -1.63546239198822 |
| C | 3.59806589581974 | 0.37825518747437  | 1.97681013734222  |
| H | 4.68735140304117 | 0.41826032343245  | 1.93809527907784  |
| C | 4.82496316192339 | 0.11634852212585  | -0.74046956872500 |
| H | 5.49439517025112 | 0.23985580856119  | 0.10754886529379  |

|   |                   |                   |                   |
|---|-------------------|-------------------|-------------------|
| C | 1.56250617151403  | 0.44854908474431  | 3.28815709118016  |
| H | 1.10159315576898  | 0.54806798843732  | 4.27128975139357  |
| C | 4.46879752167188  | -0.16663808097603 | -3.14081594871520 |
| H | 4.85600063598434  | -0.26241287427533 | -4.15450399274121 |
| C | 3.11897620155469  | -0.20171574986759 | -2.93738737078942 |
| H | 2.43060319014214  | -0.32423029625096 | -3.77644034459838 |
| C | 5.37235400231169  | -0.00625803278721 | -2.03715857921494 |
| C | 2.95825678455921  | 0.49599245525297  | 3.19773318961869  |
| H | 3.54764840897028  | 0.62837767093125  | 4.10762741969804  |
| N | -1.43619995366242 | -0.21803268398527 | -1.36097119481168 |
| C | -1.44066881309991 | 0.05392701451240  | 1.00424394856047  |
| C | -0.75510999520931 | -0.06003579728623 | -0.23514426673588 |
| C | -3.56344437397792 | -0.17619809803054 | -0.25386908077467 |
| C | -0.69125521953261 | 0.22005676287991  | 2.20561795356103  |
| C | -2.86375448243269 | -0.00441296852261 | 1.00880021530819  |
| C | -2.80452818058298 | -0.28276572563245 | -1.44304057802418 |
| C | -3.52758747612735 | 0.10519383369894  | 2.23969956908638  |
| H | -4.61581241163851 | 0.06771628650964  | 2.28844180567670  |
| C | -4.96570554767606 | -0.24457143348228 | -0.37045871954396 |
| H | -5.58912013449231 | -0.16812128046095 | 0.52093478744010  |
| C | -1.40328742516389 | 0.31814835998753  | 3.39948194255551  |
| H | -0.88080498566525 | 0.43993159081621  | 4.34837990802838  |
| C | -4.79379328090482 | -0.51320249211963 | -2.77087392795230 |
| H | -5.27839051389938 | -0.64350942804555 | -3.74106459162439 |
| C | -3.41587674174714 | -0.45158157588685 | -2.69536143875801 |
| H | -2.78984985280611 | -0.53051906916336 | -3.58697453623993 |
| C | -5.56968934869883 | -0.40904123496894 | -1.60435661532560 |
| H | -6.65872198774083 | -0.45841710429463 | -1.66994487861856 |
| C | -2.79937137075301 | 0.26166041807100  | 3.40850428698185  |
| H | -3.32737418214644 | 0.34297730465194  | 4.36140066010760  |
| N | 6.70745454781533  | 0.02579933026453  | -2.24275351516948 |
| C | 7.25459666098661  | -0.09862856954297 | -3.57689930272057 |
| H | 6.91099648251188  | 0.71523651112192  | -4.23653936578827 |

|   |                   |                   |                   |
|---|-------------------|-------------------|-------------------|
| H | 8.34741282065725  | -0.04970591110961 | -3.51883687881891 |
| H | 6.98045716580257  | -1.05933099576972 | -4.04300889573161 |
| C | 7.60907602261984  | 0.18810527057623  | -1.12450419257602 |
| H | 8.64094897502022  | 0.19455101527213  | -1.49196792965682 |
| H | 7.42762330835106  | 1.13666869008947  | -0.59168021749649 |
| H | 7.50722005144764  | -0.63568656744000 | -0.39817936429660 |
| H | -0.87061290544227 | -0.29138460006280 | -2.21341253974776 |

[2-dimethylamino-pBiphe-H]<sup>+</sup> (**23**), S<sub>0,eq</sub> in water

|   |                   |                   |                   |
|---|-------------------|-------------------|-------------------|
| N | 1.22716958891036  | -0.12325606098804 | -1.51113363144209 |
| C | 1.43354075067919  | 0.16053332959696  | 0.88950484656173  |
| C | 0.68384966232784  | -0.00992934808320 | -0.31499230281435 |
| C | 3.44871058707243  | 0.08303441709112  | -0.52291500413101 |
| C | 0.77640190428565  | 0.27839917391703  | 2.14447381655102  |
| C | 2.84714889382226  | 0.20859168531013  | 0.79187189194340  |
| C | 2.56160981086267  | -0.08117705739319 | -1.64010696477222 |
| C | 3.59696925732169  | 0.37648956054942  | 1.97132070453721  |
| H | 4.68602581235201  | 0.41557975075677  | 1.93144263807817  |
| C | 4.82449531401785  | 0.11654890208319  | -0.74098032668457 |
| H | 5.49194643066688  | 0.24096074455903  | 0.10843324307952  |
| C | 1.56233030041539  | 0.44749546834369  | 3.28248959537264  |
| H | 1.10070370402167  | 0.54696515614392  | 4.26506995099385  |
| C | 4.47401628927148  | -0.16710944033856 | -3.14065692546873 |
| H | 4.86396775007008  | -0.26292513503615 | -4.15315923598867 |
| C | 3.12373610664634  | -0.20278011014088 | -2.94017249751458 |
| H | 2.44058591896078  | -0.32591450527601 | -3.78281074497739 |
| C | 5.37446061615864  | -0.00600833822897 | -2.03563279763342 |
| C | 2.95799392023476  | 0.49439387778891  | 3.19248606885387  |
| H | 3.54740784126442  | 0.62628430759760  | 4.10207678283031  |
| N | -1.44113815184099 | -0.21900748533005 | -1.36358770400583 |
| C | -1.44046583388741 | 0.05362482513393  | 1.00086985175215  |
| C | -0.75611167552564 | -0.06075899005258 | -0.23919442456644 |
| C | -3.56634952362190 | -0.17580678846424 | -0.25173468102063 |



|   |                   |                   |                   |
|---|-------------------|-------------------|-------------------|
| C | -0.69056301287104 | 0.21977397142845  | 2.20157690104398  |
| C | -2.86357067744148 | -0.00419956968604 | 1.00867491321086  |
| C | -2.81048934099948 | -0.28309152374862 | -1.44162967622080 |
| C | -3.52577132333799 | 0.10559397383539  | 2.24030533229542  |
| H | -4.61378674958985 | 0.06803227330636  | 2.28962513620899  |
| C | -4.96891878428543 | -0.24322281738993 | -0.36483463238057 |
| H | -5.58964108154995 | -0.16580739015171 | 0.52812173777607  |
| C | -1.40038339626928 | 0.31836111603986  | 3.39664781196333  |
| H | -0.87574015504193 | 0.44028893364695  | 4.34411920036513  |
| C | -4.80209386507652 | -0.51295808329756 | -2.76536357237192 |
| H | -5.28849345239080 | -0.64336873988298 | -3.73430378313559 |
| C | -3.42405301201338 | -0.45203641475687 | -2.69237812774405 |
| H | -2.79923089815754 | -0.53154325973016 | -3.58451815094306 |
| C | -5.57563634864443 | -0.40780686737909 | -1.59730327921388 |
| H | -6.66454085385459 | -0.45646871842839 | -1.66063874165471 |
| C | -2.79631022119161 | 0.26215988185836  | 3.40822787015403  |
| H | -3.32272187216017 | 0.34370014865277  | 4.36164302616632  |
| N | 6.71101849376955  | 0.02671887737930  | -2.23846442001633 |
| C | 7.26141084145898  | -0.09738737499881 | -3.57273103901522 |
| H | 6.91947262946189  | 0.71604119186819  | -4.23289114778651 |
| H | 8.35370005820756  | -0.04760836289322 | -3.51208283908921 |
| H | 6.98986589617928  | -1.05805265538877 | -4.03920020648016 |
| C | 7.61040136634653  | 0.19011664975471  | -1.11689442020663 |
| H | 8.64276224578687  | 0.19707572114056  | -1.48191923280022 |
| H | 7.42787783989116  | 1.13849595130899  | -0.58520204049436 |
| H | 7.50814402447243  | -0.63326224515183 | -0.39096777272715 |
| H | -0.88131362518536 | -0.29287260687576 | -2.21848099643768 |

[2-dimethylamino-pBiphe-Me]<sup>+</sup> (**24**), S<sub>0,eq</sub> in vacuum

|   |                  |                   |                   |
|---|------------------|-------------------|-------------------|
| N | 1.29962393556384 | -0.11134885547261 | -1.52552664636286 |
| C | 1.45411564244291 | 0.31764916597450  | 0.84512404062459  |
| C | 0.70874920863369 | 0.13825855729876  | -0.37001860003004 |
| C | 3.50299526414063 | 0.12646986738766  | -0.51316046447855 |

|   |                   |                   |                   |
|---|-------------------|-------------------|-------------------|
| C | 0.79467958083944  | 0.42856756996398  | 2.09386892829953  |
| C | 2.87140343999584  | 0.35834497735925  | 0.77035928884753  |
| C | 2.63185267854202  | -0.14353341702834 | -1.61935835556435 |
| C | 3.60224228736425  | 0.59405476837412  | 1.94831396303665  |
| H | 4.69095279300472  | 0.64066159769405  | 1.91770690957303  |
| C | 4.88075944972541  | 0.12868072785476  | -0.71465783269768 |
| H | 5.53732375085319  | 0.34124101217927  | 0.12483351681958  |
| C | 1.56207813821564  | 0.66673609228444  | 3.23359925381238  |
| H | 1.08674308958078  | 0.77820030521334  | 4.20786448931303  |
| C | 4.56270631272564  | -0.43944477062951 | -3.06764015282315 |
| H | 4.96574492400002  | -0.66610675035509 | -4.05326279913324 |
| C | 3.21051152410228  | -0.43483332369288 | -2.88655533618448 |
| H | 2.53269880734741  | -0.65239737341784 | -3.71371913597733 |
| C | 5.44861222820908  | -0.14747699098081 | -1.97742036250913 |
| C | 2.95300763376931  | 0.76238208092020  | 3.15755001905247  |
| H | 3.52983768866019  | 0.95342101521728  | 4.06441230201732  |
| N | -1.47993063814368 | 0.24884952374776  | -1.45996039113330 |
| C | -1.40371222821310 | 0.08371494097352  | 0.93791505908102  |
| C | -0.74316734523783 | 0.16260327887798  | -0.33022544210514 |
| C | -3.52446381601320 | -0.30000147609601 | -0.25807541593834 |
| C | -0.65556654255108 | 0.24400025924678  | 2.14431987756093  |
| C | -2.81300950721542 | -0.10279552767732 | 0.98718329218225  |
| C | -2.83403262794329 | -0.10300727273258 | -1.47429254850578 |
| C | -3.45896458780338 | -0.11010297449341 | 2.22986623549323  |
| H | -4.53947085524672 | -0.23404316112274 | 2.28806090500072  |
| C | -4.88148648843350 | -0.67138089668688 | -0.31001189871114 |
| H | -5.42665320494051 | -0.84276958731168 | 0.61774329782588  |
| C | -1.34808889256183 | 0.22247965713918  | 3.35420849374398  |
| H | -0.80998425008002 | 0.33814809777036  | 4.29402339493317  |
| C | -4.83931603174560 | -0.64848884945578 | -2.71392421230781 |
| H | -5.34145497147705 | -0.80072901966389 | -3.67132765536954 |
| C | -3.50590166999959 | -0.28271582464026 | -2.69830764070831 |
| H | -2.97962995025378 | -0.17185210634999 | -3.64400197863205 |

|   |                   |                   |                   |
|---|-------------------|-------------------|-------------------|
| C | -5.53588132463103 | -0.84025929962484 | -1.51453045584874 |
| H | -6.58707457459422 | -1.13341078015125 | -1.52950129837448 |
| C | -2.73009296447455 | 0.05115354908158  | 3.39583519049031  |
| H | -3.24202042007145 | 0.04401136309703  | 4.36031592050389  |
| N | 6.78925955862508  | -0.14403069820755 | -2.16446552507131 |
| C | 7.35622124070993  | -0.43557217321438 | -3.46483131729127 |
| H | 7.02244047387951  | 0.28694119450593  | -4.22742653059974 |
| H | 8.44791473536226  | -0.37430052236027 | -3.40167639429160 |
| H | 7.09508675143073  | -1.45037689757123 | -3.80723207718586 |
| C | 7.67477540900662  | 0.14699400390973  | -1.05895025312241 |
| H | 8.71305344371411  | 0.10572175222574  | -1.40487966084286 |
| H | 7.49354131310156  | 1.15453690536647  | -0.64857865628128 |
| H | 7.55989907519644  | -0.58584738318139 | -0.24264991923459 |
| C | -0.93577021718210 | 0.79758617542911  | -2.70363799722388 |
| H | -0.07405976306780 | 1.42749465313271  | -2.47741385953457 |
| H | -0.60974269815716 | 0.00816374593504  | -3.39162603532445 |
| H | -1.72035480870476 | 1.40865909395800  | -3.16545752881219 |

[2-dimethylamino-pBiphe-Me]<sup>+</sup> (**24**), S<sub>0,eq</sub> in chloroform

|   |                  |                   |                   |
|---|------------------|-------------------|-------------------|
| N | 1.29917627954224 | -0.13425687095181 | -1.51956394578591 |
| C | 1.45392773970375 | 0.31364650589894  | 0.84627652879976  |
| C | 0.70808132893615 | 0.12721469282849  | -0.36750735013659 |
| C | 3.50367240360018 | 0.12002888322835  | -0.51266223419359 |
| C | 0.79427931866251 | 0.42623454092757  | 2.09536109770999  |
| C | 2.87172750107185 | 0.35296931275882  | 0.77183642286739  |
| C | 2.63167156256171 | -0.16202803434281 | -1.61567335243192 |
| C | 3.60405641738716 | 0.58640415692132  | 1.94998209894904  |
| H | 4.69317809923668 | 0.63128665738100  | 1.92001075033744  |
| C | 4.88129137854648 | 0.13017374300630  | -0.71483148156557 |
| H | 5.53934843116472 | 0.35202919167365  | 0.12164017013543  |
| C | 1.56166149714453 | 0.65807840232616  | 3.23696743031700  |
| H | 1.08629471354777 | 0.76286185891444  | 4.21223953750334  |
| C | 4.56205947196184 | -0.45545260335825 | -3.06636404309570 |

|   |                   |                   |                   |
|---|-------------------|-------------------|-------------------|
| H | 4.96588311131034  | -0.68351307946864 | -4.05186392931547 |
| C | 3.20962691109204  | -0.45838896375959 | -2.88234819387515 |
| H | 2.53301725647066  | -0.68265741520874 | -3.70963455474378 |
| C | 5.44819632971077  | -0.15026025048221 | -1.97881477661992 |
| C | 2.95315987091222  | 0.75145272856693  | 3.15958611083335  |
| H | 3.53058858224231  | 0.93745673682280  | 4.06762893956158  |
| N | -1.47713392822075 | 0.24954557168560  | -1.45852237402498 |
| C | -1.40430390507928 | 0.07964603197208  | 0.93927222580749  |
| C | -0.74366025726186 | 0.15769059097919  | -0.32959993276523 |
| C | -3.52223747136865 | -0.30430392473693 | -0.25895336522977 |
| C | -0.65733841283711 | 0.24554834304585  | 2.14535523809011  |
| C | -2.81295153238205 | -0.10689097551919 | 0.98803575354891  |
| C | -2.83072905113025 | -0.10077470615340 | -1.47390764238569 |
| C | -3.46140797194024 | -0.11028731562877 | 2.23025482097298  |
| H | -4.54211802156677 | -0.23594304455529 | 2.28816194064394  |
| C | -4.87921292480233 | -0.67784309039802 | -0.31207695932563 |
| H | -5.42505625057931 | -0.85260739013645 | 0.61516514310391  |
| C | -1.35070309070703 | 0.23426263521469  | 3.35554243807839  |
| H | -0.81443633123221 | 0.36164337066777  | 4.29535537844274  |
| C | -4.83438842451660 | -0.64081997708808 | -2.71755350944715 |
| H | -5.33602063064298 | -0.78669953414233 | -3.67672949140554 |
| C | -3.50144846810251 | -0.27243528102568 | -2.70016672133475 |
| H | -2.97426995721612 | -0.14994558670152 | -3.64421163925983 |
| C | -5.53128941301285 | -0.84179914602431 | -1.51923222804162 |
| H | -6.58241584943250 | -1.13689495604959 | -1.53642177819490 |
| C | -2.73298125266503 | 0.06074819162698  | 3.39555935167860  |
| H | -3.24609183553680 | 0.06045585932589  | 4.35979289887919  |
| N | 6.78638470630115  | -0.13779666078478 | -2.16753277397273 |
| C | 7.35459520606718  | -0.43840883046984 | -3.46505010123143 |
| H | 7.01686977289457  | 0.27562368486514  | -4.23411500471827 |
| H | 8.44613372100660  | -0.37328640828887 | -3.40033115544581 |
| H | 7.09432496991623  | -1.45613885350091 | -3.79934508088722 |
| C | 7.67203722761465  | 0.17077244502731  | -1.06669228117828 |

|   |                   |                   |                   |
|---|-------------------|-------------------|-------------------|
| H | 8.70874471091013  | 0.14329277297866  | -1.41913637503166 |
| H | 7.47616362471044  | 1.17641280111008  | -0.65862412090358 |
| H | 7.56988628392871  | -0.55882313151777 | -0.24577861412796 |
| C | -0.93252634450230 | 0.80476453879080  | -2.69956938883141 |
| H | -0.06619708123233 | 1.42772311169912  | -2.47101161082063 |
| H | -0.62641092294861 | 0.01872480799122  | -3.40048559097031 |
| H | -1.71170909923926 | 1.43046386205865  | -3.15091267496256 |

[2-dimethylamino-pBiphe-Me]<sup>+</sup> (**24**), S<sub>0,eq</sub> in methanol

|   |                   |                   |                   |
|---|-------------------|-------------------|-------------------|
| N | 1.29830489994480  | -0.14749019628590 | -1.51927281399790 |
| C | 1.45348259278201  | 0.31286458204572  | 0.84431952062782  |
| C | 0.70764370935049  | 0.12193167855598  | -0.36850848235981 |
| C | 3.50303932562822  | 0.11751668293408  | -0.51394984531318 |
| C | 0.79405817901308  | 0.42644087176932  | 2.09357192977422  |
| C | 2.87113079723967  | 0.35369805977264  | 0.76989484678242  |
| C | 2.63135872094272  | -0.17322368385902 | -1.61496138727523 |
| C | 3.60378347381899  | 0.59088056924502  | 1.94715699745706  |
| H | 4.69306226268423  | 0.63740148670579  | 1.91765360564089  |
| C | 4.88058054113770  | 0.13139528269901  | -0.71554971073883 |
| H | 5.53813554529391  | 0.36008306618248  | 0.11976632876466  |
| C | 1.56097986821344  | 0.66118222986514  | 3.23487437292055  |
| H | 1.08596577624591  | 0.76596554872952  | 4.21052846684617  |
| C | 4.56305228157939  | -0.46844693807587 | -3.06414187555420 |
| H | 4.96707048920070  | -0.69990228606060 | -4.04902225654465 |
| C | 3.21058100095330  | -0.47500152320443 | -2.87978299697148 |
| H | 2.53615333989344  | -0.70519559541927 | -3.70754073939212 |
| C | 5.44811423667548  | -0.15394527482752 | -1.97838213349372 |
| C | 2.95236325973466  | 0.75708354818887  | 3.15648354761652  |
| H | 3.52981706939267  | 0.94567681065350  | 4.06422621709276  |
| N | -1.47687787236775 | 0.25157441116388  | -1.45755025647088 |
| C | -1.40381231812514 | 0.07547203818544  | 0.93910579802043  |
| C | -0.74351002529444 | 0.15505567378659  | -0.32970673385457 |
| C | -3.52119297975735 | -0.30701061556565 | -0.25922566053375 |

|   |                   |                   |                   |
|---|-------------------|-------------------|-------------------|
| C | -0.65697921771942 | 0.24263585153327  | 2.14468744659810  |
| C | -2.81198058044822 | -0.11211683621426 | 0.98798797018308  |
| C | -2.83030848552041 | -0.09810586365621 | -1.47347472212179 |
| C | -3.46036952030693 | -0.11751084502117 | 2.23030570080731  |
| H | -4.54113383251351 | -0.24424534382473 | 2.28915610242205  |
| C | -4.87792595995580 | -0.68142616825065 | -0.31291148824369 |
| H | -5.42405430431733 | -0.86031492539666 | 0.61367381661362  |
| C | -1.34942419764127 | 0.23031319241116  | 3.35542941670585  |
| H | -0.81362147479975 | 0.35934083207297  | 4.29556152718360  |
| C | -4.83325604602985 | -0.63328860241033 | -2.71880522186557 |
| H | -5.33513398047278 | -0.77483122899157 | -3.67875466229219 |
| C | -3.50059554457715 | -0.26391475814686 | -2.70054743921639 |
| H | -2.97387224505362 | -0.13578563327493 | -3.64435800018617 |
| C | -5.52966811024382 | -0.84055119524593 | -1.52106820004835 |
| H | -6.58081095053821 | -1.13640924862430 | -1.53935621655219 |
| C | -2.73148684189275 | 0.05410000688607  | 3.39534911258693  |
| H | -3.24438648078175 | 0.05269695112833  | 4.35989326865874  |
| N | 6.78554161559851  | -0.13736643281178 | -2.16718951916422 |
| C | 7.35482518296247  | -0.44514958881549 | -3.46280743907560 |
| H | 7.01652145178222  | 0.26381905877455  | -4.23633437201003 |
| H | 8.44631625647480  | -0.37851772709200 | -3.39763754218886 |
| H | 7.09559479981441  | -1.46510035931104 | -3.79094110640301 |
| C | 7.67011521756251  | 0.18226140215248  | -1.06816045313828 |
| H | 8.70663415443880  | 0.15997755940142  | -1.42173193643187 |
| H | 7.46778063067222  | 1.18840735296462  | -0.66471865387183 |
| H | 7.57335068177494  | -0.54392817434240 | -0.24361284943218 |
| C | -0.93368279879655 | 0.81662001204019  | -2.69507359818800 |
| H | -0.06497538786059 | 1.43491222638776  | -2.46232317515105 |
| H | -0.63602305572453 | 0.03707101942877  | -3.40666435994752 |
| H | -1.71127515006691 | 1.45130103906396  | -3.13676014527365 |

[2-dimethylamino-pBiphe-Me]<sup>+</sup> (**24**), S<sub>0,eq</sub> in dimethyl sulfoxide

|   |                  |                   |                   |
|---|------------------|-------------------|-------------------|
| N | 1.29916137097344 | -0.14344448858325 | -1.51859156973320 |
|---|------------------|-------------------|-------------------|

|   |                   |                   |                   |
|---|-------------------|-------------------|-------------------|
| C | 1.45396061241306  | 0.31147406366498  | 0.84570337708543  |
| C | 0.70809520907071  | 0.12241487073917  | -0.36759607609589 |
| C | 3.50373912466505  | 0.11739729927528  | -0.51286439090703 |
| C | 0.79437088671526  | 0.42472510302024  | 2.09475245120553  |
| C | 2.87166434393440  | 0.35098629003817  | 0.77146995391164  |
| C | 2.63172063952743  | -0.16950638739419 | -1.61479532864605 |
| C | 3.60445145936010  | 0.58472756945298  | 1.94925645820786  |
| H | 4.69372565704989  | 0.62965955946026  | 1.91958554311180  |
| C | 4.88113365207482  | 0.13075141895309  | -0.71454099362850 |
| H | 5.53913676625278  | 0.35673275755379  | 0.12113818385756  |
| C | 1.56142519545737  | 0.65603295971152  | 3.23668874352928  |
| H | 1.08609709732104  | 0.75981230920449  | 4.21221667357701  |
| C | 4.56252507152367  | -0.46211270847866 | -3.06538425210275 |
| H | 4.96670814129639  | -0.69115050658712 | -4.05066384188672 |
| C | 3.21012452430270  | -0.46800402285377 | -2.88083761092415 |
| H | 2.53445601985950  | -0.69518503496050 | -3.70832503234691 |
| C | 5.44814626096025  | -0.15146011859838 | -1.97863330621318 |
| C | 2.95296672860362  | 0.74940133985738  | 3.15877326586768  |
| H | 3.53047326722619  | 0.93503618555565  | 4.06694249358664  |
| N | -1.47586893522958 | 0.24858798857872  | -1.45823643383825 |
| C | -1.40391653750515 | 0.07761453532631  | 0.93923369027224  |
| C | -0.74343370615461 | 0.15504778940802  | -0.32986569823488 |
| C | -3.52116457478882 | -0.30447354655707 | -0.25909254879047 |
| C | -0.65717739745458 | 0.24451181966100  | 2.14493808985968  |
| C | -2.81223828856476 | -0.10818760469887 | 0.98803448675902  |
| C | -2.82932654286024 | -0.09987873479602 | -1.47367748781825 |
| C | -3.46117675611779 | -0.11096010992212 | 2.23007399190373  |
| H | -4.54203202512594 | -0.23640522157231 | 2.28836424483241  |
| C | -4.87845955927038 | -0.67679305059416 | -0.31208962568834 |
| H | -5.42479967022672 | -0.85183913407282 | 0.61498976165277  |
| C | -1.35013740639148 | 0.23513481567016  | 3.35538164087547  |
| H | -0.81422363273916 | 0.36468690709731  | 4.29527725100772  |
| C | -4.83296475613204 | -0.63599791074351 | -2.71795775171121 |

|   |                   |                   |                   |
|---|-------------------|-------------------|-------------------|
| H | -5.33467157536922 | -0.77961156279573 | -3.67754196382496 |
| C | -3.49978712206654 | -0.26862058033947 | -2.70048390622816 |
| H | -2.97246363034638 | -0.14413295185563 | -3.64431062787439 |
| C | -5.53009969328428 | -0.83844183928492 | -1.51990297998291 |
| H | -6.58159976729118 | -1.13258869689418 | -1.53760324620363 |
| C | -2.73248184885861 | 0.06139975105111  | 3.39505443872409  |
| H | -3.24566791499890 | 0.06235820352597  | 4.35930404312428  |
| N | 6.78497716841565  | -0.13543719840065 | -2.16756142447498 |
| C | 7.35345229149852  | -0.43767395726463 | -3.46429058134049 |
| H | 7.01212842371836  | 0.27332036992411  | -4.23454126118131 |
| H | 8.44474598272154  | -0.36962995500102 | -3.39925813584624 |
| H | 7.09383084591773  | -1.45640038839106 | -3.79580110220683 |
| C | 7.66974996051162  | 0.17942842800159  | -1.06797330294007 |
| H | 8.70606418541257  | 0.15469987251851  | -1.42162854660111 |
| H | 7.46862770108006  | 1.18489138450618  | -0.66226170116831 |
| H | 7.56897374760039  | -0.54788957071959 | -0.24499481476005 |
| C | -0.93099512492039 | 0.80503847726673  | -2.69863275356336 |
| H | -0.06281675946604 | 1.42504691681702  | -2.46895775394299 |
| H | -0.63121278671376 | 0.01936627660443  | -3.40262054389469 |
| H | -1.70891632358768 | 1.43444001891544  | -3.14686218835152 |

[2-dimethylamino-pBiphe-Me]<sup>+</sup> (**24**), S<sub>0,eq</sub> in water

|   |                  |                   |                   |
|---|------------------|-------------------|-------------------|
| N | 1.29765104791787 | -0.18620064017836 | -1.51649740539098 |
| C | 1.45332979995164 | 0.27599513287850  | 0.84745223470869  |
| C | 0.70776076643104 | 0.09124365399668  | -0.36634060451692 |
| C | 3.50265887565375 | 0.07207490276355  | -0.50795484718362 |
| C | 0.79439930388361 | 0.38798699558490  | 2.09705212904732  |
| C | 2.87084177110072 | 0.31073194824955  | 0.77492445804519  |
| C | 2.63182941409119 | -0.21886424103831 | -1.60922768352155 |
| C | 3.60409583445988 | 0.54295433978125  | 1.95276031702846  |
| H | 4.69329318759042 | 0.58458669860462  | 1.92273379073170  |
| C | 4.88064626704256 | 0.08246777965585  | -0.70628539811145 |
| H | 5.53679768877865 | 0.31208416755919  | 0.12981468260728  |



|   |                   |                   |                   |
|---|-------------------|-------------------|-------------------|
| C | 1.56122049358601  | 0.61733165564108  | 3.23932664747880  |
| H | 1.08491490571174  | 0.72043223272486  | 4.21425789811860  |
| C | 4.56657014702814  | -0.52452239690678 | -3.05265623594675 |
| H | 4.97287857994517  | -0.75992328311644 | -4.03543737381547 |
| C | 3.21364605535178  | -0.52698042093441 | -2.87125215886996 |
| H | 2.54273739663519  | -0.75805422431678 | -3.70094018180388 |
| C | 5.44965286802558  | -0.20788216961164 | -1.96666333254714 |
| C | 2.95291947538237  | 0.70925265683799  | 3.16211210183834  |
| H | 3.53034621945285  | 0.89387115126458  | 4.07017691101198  |
| N | -1.47722109852406 | 0.25151306261842  | -1.45220801104321 |
| C | -1.40402423138359 | 0.05214819237284  | 0.94169465548321  |
| C | -0.74308457786774 | 0.13712024443538  | -0.32626658457543 |
| C | -3.52528554105987 | -0.30271019033007 | -0.25838129956150 |
| C | -0.65656110783623 | 0.20709668162467  | 2.14809325156299  |
| C | -2.81311464654750 | -0.12806902443887 | 0.98989681855587  |
| C | -2.83473579171251 | -0.08334190129736 | -1.47044874102295 |
| C | -3.46048586121076 | -0.14355127008821 | 2.23267198678816  |
| H | -4.54146799631836 | -0.26662192821025 | 2.29086680736800  |
| C | -4.88526944770043 | -0.66431401019117 | -0.31494349245738 |
| H | -5.43103573607788 | -0.85072532034554 | 0.61003372987118  |
| C | -1.34771594542816 | 0.18675192129065  | 3.35931487873417  |
| H | -0.80994757761227 | 0.30644088779268  | 4.29929833001324  |
| C | -4.84388856070233 | -0.58104253972520 | -2.72009607953980 |
| H | -5.34863530528700 | -0.70325074301493 | -3.68070841923333 |
| C | -3.50796026160079 | -0.22397973941598 | -2.69873277361668 |
| H | -2.98105752212591 | -0.08537471284270 | -3.64071313194124 |
| C | -5.54003592804900 | -0.80023761847367 | -1.52427224095303 |
| H | -6.59338563392618 | -1.08636911393450 | -1.54515138663735 |
| C | -2.73020124661500 | 0.01406598388091  | 3.39881134103748  |
| H | -3.24227181974410 | 0.00510391550311  | 4.36327051319955  |
| N | 6.78789031532603  | -0.19396346480643 | -2.15315187258304 |
| C | 7.35937956065946  | -0.51466812499176 | -3.44552721625690 |
| H | 7.02670283299116  | 0.18971531456939  | -4.22487505138459 |

|   |                   |                   |                   |
|---|-------------------|-------------------|-------------------|
| H | 8.45049773178257  | -0.45317642744665 | -3.37686978503060 |
| H | 7.09507167229483  | -1.53506352275653 | -3.76626478197005 |
| C | 7.67081992066536  | 0.12733250649649  | -1.05225955427365 |
| H | 8.70704153595261  | 0.10824504847134  | -1.40560933514935 |
| H | 7.46473794909158  | 1.13201819948233  | -0.64881265912511 |
| H | 7.57483314034474  | -0.59908882176247 | -0.22846978575802 |
| C | -0.93141676257797 | 0.82908237331991  | -2.68299219893183 |
| H | -0.05037994564646 | 1.42600314204044  | -2.44421502344420 |
| H | -0.65685840692744 | 0.05818944190518  | -3.41215609434072 |
| H | -1.69984471864701 | 1.48643123182868  | -3.10637535869249 |

10-dimethylamino-pBiphe (**25**), S<sub>0,eq</sub> in vacuum

|   |                   |                   |                   |
|---|-------------------|-------------------|-------------------|
| N | 1.37645065386408  | 0.14672212902839  | -1.33229380743541 |
| C | 1.47256994709553  | -0.09110001860528 | 1.07201941307767  |
| C | 0.77267225348586  | 0.03342483738903  | -0.18593552390220 |
| C | 3.55298596656018  | -0.04269342924990 | -0.22735903857151 |
| C | 0.74070970903047  | -0.28583451445694 | 2.27631750540846  |
| C | 2.89457136338904  | -0.00933804133462 | 1.06641754834180  |
| C | 2.72996526034023  | 0.06540395909598  | -1.38614399186425 |
| C | 3.57634108243566  | 0.05228100258477  | 2.32682996348005  |
| C | 4.93810250024661  | -0.25463975440739 | -0.43074940985055 |
| H | 5.57576938638106  | -0.40878856663769 | 0.43740097213067  |
| C | 1.46354138938274  | -0.38101787479201 | 3.45888921455783  |
| H | 0.95248447883417  | -0.54631697519668 | 4.40746547970335  |
| C | 4.66860007759794  | -0.12304633281741 | -2.83651027366848 |
| H | 5.10972029582408  | -0.14289252024445 | -3.83576492879485 |
| C | 3.31270792648915  | 0.05200040356009  | -2.67582293445175 |
| H | 2.63168335623620  | 0.16039309273027  | -3.52161559466259 |
| C | 5.47907504864369  | -0.30131473403396 | -1.70072818080254 |
| H | 6.55026307442497  | -0.48160722606672 | -1.81958077046161 |
| C | 2.84251456410689  | -0.19327843752482 | 3.48574139358156  |
| H | 3.34674640069453  | -0.18885699363651 | 4.45184764163534  |
| N | -1.30414476903968 | 0.25329798709273  | -1.33907866591964 |

|   |                   |                   |                   |
|---|-------------------|-------------------|-------------------|
| C | -1.42530301917359 | -0.18438526321960 | 1.03212426034020  |
| C | -0.71134617076189 | 0.04812558308186  | -0.19762397665728 |
| C | -3.49380880343253 | 0.00704563224375  | -0.27840366487933 |
| C | -0.72552423802797 | -0.37844763491468 | 2.25419650590407  |
| C | -2.84362999355435 | -0.22283347002790 | 0.99198226659946  |
| C | -2.66231674303285 | 0.24745985661988  | -1.40655247740281 |
| C | -3.55110209317383 | -0.48116055517192 | 2.18195389471867  |
| H | -4.64052058474569 | -0.52045678619818 | 2.17529660724178  |
| C | -4.89276294659296 | 0.01075187328461  | -0.45845090453574 |
| H | -5.55219660526887 | -0.17153287014452 | 0.39152172113474  |
| C | -1.47032625769697 | -0.63872528451153 | 3.40237071874367  |
| H | -0.97159490762578 | -0.80837865125593 | 4.35653617840280  |
| C | -4.62323397534388 | 0.48644230940210  | -2.81686062929645 |
| H | -5.07151461051382 | 0.67145110389677  | -3.79581102502905 |
| C | -3.25323011563746 | 0.48624289298285  | -2.66991728855360 |
| H | -2.57649995976826 | 0.66534412321484  | -3.50716908002252 |
| C | -5.44787677535802 | 0.24586171609602  | -1.70142870109796 |
| H | -6.53411349933540 | 0.24522873567171  | -1.81803732289439 |
| C | -2.86721876063473 | -0.69109850211150 | 3.36327533786365  |
| H | -3.42079142390493 | -0.89821391563605 | 4.28203217482774  |
| N | 4.93779534144906  | 0.36597312041299  | 2.40483278011021  |
| C | 5.32570102932091  | 1.67164726649071  | 1.90716002868210  |
| H | 5.16077845298843  | 2.45894270221645  | 2.66973899968856  |
| H | 6.39265536797045  | 1.67345345633273  | 1.63361893608671  |
| H | 4.74949064178844  | 1.93654488704609  | 1.01311687852867  |
| C | 5.65655166286689  | -0.01282798037161 | 3.59282306813369  |
| H | 6.73665802616909  | 0.06734784489622  | 3.39614382132496  |
| H | 5.43373160444577  | 0.62784929129634  | 4.47198089321133  |
| H | 5.43611939056127  | -1.05624947409941 | 3.85810398729476  |

[10-dimethylamino-pBiphe-H]<sup>+</sup> (**26**), S<sub>0,eq</sub> in vacuum

|   |                  |                   |                   |
|---|------------------|-------------------|-------------------|
| N | 1.33957763638546 | 0.19484127359997  | -1.28777766244119 |
| C | 1.46484183380017 | -0.09087373361886 | 1.12251175905051  |

|   |                   |                   |                   |
|---|-------------------|-------------------|-------------------|
| C | 0.77040155813228  | 0.04986860198467  | -0.11887830306701 |
| C | 3.51361878786345  | -0.03560528243072 | -0.20933151262859 |
| C | 0.73604519335390  | -0.32078658680203 | 2.31831548561706  |
| C | 2.88303057520006  | -0.00291870553103 | 1.09068363527979  |
| C | 2.68561349602303  | 0.11245407756964  | -1.37239006098458 |
| C | 3.58386021467782  | 0.03169719835939  | 2.35148337035392  |
| C | 4.88937213623503  | -0.28614127615028 | -0.42803703371971 |
| H | 5.53021889767571  | -0.48933518719416 | 0.42765092677784  |
| C | 1.48423001505380  | -0.49871934322936 | 3.48209301329450  |
| H | 0.98941027025486  | -0.72051353500863 | 4.42827234146331  |
| C | 4.60989813121518  | -0.07533215639576 | -2.83273867755800 |
| H | 5.05116111112409  | -0.07890751398429 | -3.83131949871153 |
| C | 3.26167858682455  | 0.12666657154991  | -2.66748098611555 |
| H | 2.59052493506495  | 0.26963243453495  | -3.51583010680065 |
| C | 5.41781571786128  | -0.31520786085295 | -1.70167834407726 |
| H | 6.48000771091742  | -0.53245980370283 | -1.83458710589246 |
| C | 2.86199092269687  | -0.32553968598809 | 3.50041289296096  |
| H | 3.37597409502460  | -0.38874660805998 | 4.45847154380994  |
| N | -1.29802946797737 | 0.21286960518529  | -1.27467088585699 |
| C | -1.42398034202746 | -0.17489951877430 | 1.06876714638423  |
| C | -0.68453620569045 | 0.03695994921269  | -0.11293824551598 |
| C | -3.47992867772400 | 0.01073195409959  | -0.30187916861137 |
| C | -0.72293603186086 | -0.37360505447479 | 2.29775347424559  |
| C | -2.84993672214724 | -0.19890170144103 | 0.99060128228490  |
| C | -2.66214597918284 | 0.21608432457572  | -1.43994544761677 |
| C | -3.56817641900100 | -0.42975056633890 | 2.16919906922745  |
| H | -4.65715619629455 | -0.45855942534796 | 2.16083143516192  |
| C | -4.87452549667879 | 0.01946684193623  | -0.49942839047774 |
| H | -5.54158922571766 | -0.13310490752150 | 0.34899259881615  |
| C | -1.49685011294842 | -0.60413945985683 | 3.43584403202899  |
| H | -1.02182783265576 | -0.76585102635550 | 4.40310736535322  |
| C | -4.58375278239862 | 0.41983380984764  | -2.86843483667999 |
| H | -5.01992053217336 | 0.57704899633987  | -3.85677178201663 |

|   |                   |                   |                   |
|---|-------------------|-------------------|-------------------|
| C | -3.21141368663655 | 0.41864420457843  | -2.71545991040597 |
| H | -2.54947888751512 | 0.57338457922203  | -3.57051390347975 |
| C | -5.41688084487886 | 0.21991005354915  | -1.75515096654877 |
| H | -6.50103153722691 | 0.22276031712642  | -1.88206200129192 |
| C | -2.89043142542907 | -0.62930665801075 | 3.36478060253263  |
| H | -3.46270186786123 | -0.81042120744314 | 4.27733035889952  |
| N | 4.90478368964012  | 0.40253549320537  | 2.44002574153710  |
| C | 5.34932995209553  | 1.63208739639481  | 1.80587882869092  |
| H | 5.41424343520071  | 2.43909100816013  | 2.55779637176105  |
| H | 6.34263276611280  | 1.50701065587931  | 1.34799179406734  |
| H | 4.64955296381604  | 1.95109512114102  | 1.02669386391611  |
| C | 5.65727060507817  | 0.06551065996750  | 3.62633873542663  |
| H | 6.72832147661532  | 0.17976484377789  | 3.40747042367562  |
| H | 5.41905693135087  | 0.71900593829268  | 4.48747856751037  |
| H | 5.48120689049037  | -0.98000095162579 | 3.91247151185992  |
| H | -0.66014026175837 | 0.34187184604915  | -2.06744334148911 |

[10-dimethylamino-pBiphe-Me]<sup>+</sup> (**27**), S<sub>0,eq</sub> in vacuum

|   |                  |                   |                   |
|---|------------------|-------------------|-------------------|
| N | 1.40528907109307 | -0.01025199600911 | -1.32487917963802 |
| C | 1.47387301759300 | -0.04869616488513 | 1.08982597617271  |
| C | 0.78985051874227 | 0.05394191165635  | -0.17020601991249 |
| C | 3.55175752473986 | -0.20444509059574 | -0.18585257138703 |
| C | 0.74311126404936 | -0.24561637764597 | 2.28296980168267  |
| C | 2.89500756477619 | 0.00979201619934  | 1.07995813820585  |
| C | 2.73909127598374 | -0.20732597196084 | -1.36542852329549 |
| C | 3.57526245531725 | 0.15876092382008  | 2.34290435624478  |
| C | 4.92188783020960 | -0.52316903793036 | -0.34304994857251 |
| H | 5.55129751014139 | -0.60643122444553 | 0.54076613685472  |
| C | 1.47012850859169 | -0.32432772025864 | 3.47346353329514  |
| H | 0.96038031070965 | -0.49789597010302 | 4.42143966242058  |
| C | 4.66171650693785 | -0.71300149924672 | -2.75282418016236 |
| H | 5.10785958204907 | -0.90210566355639 | -3.73110979992341 |
| C | 3.32150029484272 | -0.43702601595039 | -2.63848958443343 |

|   |                   |                   |                   |
|---|-------------------|-------------------|-------------------|
| H | 2.65991406889551  | -0.41199229114865 | -3.50579714644332 |
| C | 5.45568709307550  | -0.78025558672822 | -1.58864659974553 |
| H | 6.51130982608840  | -1.04868774227622 | -1.67164074441357 |
| C | 2.83913569799662  | -0.10818637145486 | 3.50820009038058  |
| H | 3.33519003049901  | -0.08264762012178 | 4.47733580859047  |
| N | -1.33118484490107 | 0.57003549845806  | -1.28589355414625 |
| C | -1.39598808607015 | -0.21451462151736 | 0.98420671177226  |
| C | -0.67374422893315 | 0.16382515689935  | -0.18187370193585 |
| C | -3.46274978463216 | -0.15079705506525 | -0.35546321948554 |
| C | -0.69915654543872 | -0.41525314243905 | 2.21948118067700  |
| C | -2.81465779360136 | -0.34566925714979 | 0.92315966769345  |
| C | -2.69951464348197 | 0.32628735355388  | -1.44542748801807 |
| C | -3.51909005964031 | -0.67607625437854 | 2.08489717865238  |
| H | -4.60372559602318 | -0.77094797627224 | 2.06662188861855  |
| C | -4.83287752740756 | -0.40643303627307 | -0.55937964747560 |
| H | -5.43548007327772 | -0.78640765203742 | 0.26495459912275  |
| C | -1.45433247001337 | -0.75291225262033 | 3.34444059457414  |
| H | -0.96229614372886 | -0.92303553182996 | 4.30122837960690  |
| C | -4.66018642093426 | 0.26694854633439  | -2.86168868481905 |
| H | -5.11801549940447 | 0.41345392807214  | -3.84189932219702 |
| C | -3.31343611834705 | 0.52955364887888  | -2.69650493072834 |
| H | -2.73380492022885 | 0.86100651040396  | -3.55523624366141 |
| C | -5.42876224720486 | -0.19926165789222 | -1.78720302032898 |
| H | -6.49145685811597 | -0.40875124821550 | -1.92157780730656 |
| C | -2.83869312930106 | -0.87938981134124 | 3.27629100278665  |
| H | -3.39718751439546 | -1.14017319570035 | 4.17781748171090  |
| N | 4.88996838983828  | 0.54487824780545  | 2.41549096368281  |
| C | 5.36304164481888  | 1.67405585116914  | 1.63434561922503  |
| H | 5.46433743080110  | 2.56090386701206  | 2.28500656892807  |
| H | 6.34466880927382  | 1.46583628806034  | 1.18099819891033  |
| H | 4.65988451750726  | 1.91995096735707  | 0.83203214403219  |
| C | 5.62727443141342  | 0.33992481214102  | 3.64108333512868  |
| H | 6.70073972848711  | 0.43746408733515  | 3.42666906693179  |

|   |                   |                   |                   |
|---|-------------------|-------------------|-------------------|
| H | 5.37169073012103  | 1.07905644829462  | 4.42408969170467  |
| H | 5.45283983737332  | -0.67051442518421 | 4.03414061723058  |
| C | -0.67992898872762 | 1.36447262955933  | -2.33077524235913 |
| H | 0.21590266822713  | 1.83796935816815  | -1.92727549650994 |
| H | -0.38445935908523 | 0.74519844031914  | -3.18622297775594 |
| H | -1.38796928729876 | 2.14038297073619  | -2.64467276018179 |

2-trifluoromethyl-pBiphe (**28**), S<sub>0,eq</sub> in vacuum

|   |                   |                   |                   |
|---|-------------------|-------------------|-------------------|
| N | 1.35982403961953  | 0.05091037259216  | -1.38665256388603 |
| C | 1.45024921671694  | -0.03513240104002 | 1.02603462851753  |
| C | 0.75288417026319  | -0.00209296036624 | -0.23604503771979 |
| C | 3.53527639823526  | 0.05043554732823  | -0.27298341749262 |
| C | 0.74172214924941  | -0.09274066402497 | 2.25797094956694  |
| C | 2.86932216625401  | -0.00834135454032 | 1.00845733904223  |
| C | 2.71805408225437  | 0.07773956726375  | -1.43639184664318 |
| C | 3.56590721003165  | -0.03968354282115 | 2.23258338144290  |
| C | 4.93619866433647  | 0.08202866397737  | -0.43323620768717 |
| H | 5.58685949619752  | 0.06210751642200  | 0.44228090165555  |
| C | 1.47562419076686  | -0.12185189562170 | 3.44003585719463  |
| H | 0.96797503572666  | -0.16585041529387 | 4.40343977147817  |
| C | 4.69367655220193  | 0.16551570003162  | -2.84156631361220 |
| H | 5.15389325092573  | 0.21020308332626  | -3.83125248048124 |
| C | 3.32225528457715  | 0.13555405023139  | -2.71447127235785 |
| H | 2.65534085630620  | 0.15484111059179  | -3.57803960487144 |
| C | 5.50466819373906  | 0.13841367016765  | -1.69099910674389 |
| H | 6.59213357967468  | 0.16216649125918  | -1.79212060593183 |
| C | 2.87420773141232  | -0.09552700165323 | 3.42568535052840  |
| H | 3.42061224854871  | -0.11952100754702 | 4.37112085836093  |
| N | -1.33118963651465 | 0.00262124225383  | -1.39696319807578 |
| C | -1.43357709435321 | -0.08706438392586 | 1.01645433818478  |
| C | -0.72971535506550 | -0.02867858405054 | -0.24174628534496 |
| C | -3.50939838008552 | -0.07592293742637 | -0.29511155537413 |
| C | -0.73070394873146 | -0.11941871482213 | 2.25287680904994  |

|   |                   |                   |                   |
|---|-------------------|-------------------|-------------------|
| C | -2.85258125302394 | -0.11133048022510 | 0.99149004077039  |
| C | -2.68823349606247 | -0.01950088185405 | -1.45225549550431 |
| C | -3.55718354664045 | -0.16817069811555 | 2.20937540735718  |
| H | -4.64715172364196 | -0.18759405611943 | 2.21305777844832  |
| C | -4.90886701428808 | -0.09428514489918 | -0.45902454483851 |
| H | -5.56754605669685 | -0.13773830789185 | 0.40783937535758  |
| C | -1.47214680951004 | -0.17565296191754 | 3.42950763679137  |
| H | -0.96971376851115 | -0.20201322375465 | 4.39623833140470  |
| C | -4.65772974609641 | -0.00346477286109 | -2.87013632680575 |
| H | -5.11814269124234 | 0.02295320585890  | -3.85997367345121 |
| C | -3.29015612548851 | 0.01583774302322  | -2.73367490305141 |
| H | -2.62231636892254 | 0.05814663722455  | -3.59534406753463 |
| C | -5.47139027650906 | -0.05865507104195 | -1.71879149155483 |
| C | -2.87050978875553 | -0.19972729642670 | 3.40638705004898  |
| H | -3.42152823382655 | -0.24395365405717 | 4.34838474074706  |
| C | -6.96314576151699 | -0.07158974046681 | -1.89491467723039 |
| F | -7.39030043923845 | 1.03954539570874  | -2.50559645379499 |
| F | -7.61130263781777 | -0.16124806004418 | -0.73043433924920 |
| F | -7.35458861050614 | -1.10261543332349 | -2.65198354110165 |
| H | 4.65580621200792  | -0.01987188112843 | 2.24302436939140  |

10-trifluoromethyl-pBiphe (**29**),  $S_{0,eq}$  in vacuum

|   |                  |                   |                   |
|---|------------------|-------------------|-------------------|
| N | 1.34778498503375 | 0.16651435852809  | -1.40489321499306 |
| C | 1.48684709178449 | 0.04858300784052  | 1.00376623349611  |
| C | 0.76375853613463 | 0.08342812533671  | -0.24780016403070 |
| C | 3.54578984569659 | 0.01792421898516  | -0.33242510793682 |
| C | 0.76560744901867 | -0.02011750164709 | 2.22912496961866  |
| C | 2.91429211583730 | 0.12768975691847  | 0.97404532171632  |
| C | 2.70074438154886 | 0.10274136892113  | -1.47788207786487 |
| C | 3.58094452889002 | 0.32444873798913  | 2.22136416888628  |
| C | 4.91779658516434 | -0.22881899934040 | -0.56439165636610 |
| H | 5.59445054175549 | -0.41570327591049 | 0.26176527462292  |
| C | 1.48178189942670 | 0.05493684188161  | 3.41581730970382  |



|   |                   |                   |                   |
|---|-------------------|-------------------|-------------------|
| H | 0.97586548556996  | 0.01108524870244  | 4.37913417407676  |
| C | 4.60571202201561  | -0.11144204411331 | -2.96568790790264 |
| H | 5.02665250791190  | -0.14833121060018 | -3.97299697608614 |
| C | 3.25455008724897  | 0.07105025758166  | -2.77912849991533 |
| H | 2.55435479050585  | 0.16571455108480  | -3.61056952966821 |
| C | 5.43375799360966  | -0.28988816589842 | -1.84453293063227 |
| H | 6.49904054532546  | -0.49028227510979 | -1.97931787905593 |
| C | 2.85623103087805  | 0.26299529899888  | 3.40201555859275  |
| H | 3.37373982176214  | 0.41304104651309  | 4.34898590618019  |
| N | -1.32895722083404 | 0.13391512078500  | -1.39171003903824 |
| C | -1.41622097445845 | -0.08836787586054 | 1.00762871488895  |
| C | -0.71957454809320 | 0.05289681575462  | -0.24407651221086 |
| C | -3.50147278347816 | -0.07511173478323 | -0.28891166779734 |
| C | -0.70113604796358 | -0.14952136705771 | 2.23211712749636  |
| C | -2.83230990306417 | -0.17054882259827 | 0.98809458094658  |
| C | -2.68681400189282 | 0.08435220799378  | -1.44375900302819 |
| C | -3.51813429478317 | -0.34023066112151 | 2.20678262627369  |
| H | -4.60601788894387 | -0.41092415090957 | 2.21757183563104  |
| C | -4.90132493190490 | -0.12667659621819 | -0.45210063124446 |
| H | -5.54853615725046 | -0.24863041154269 | 0.41780118884136  |
| C | -1.42263302548108 | -0.32660809205062 | 3.40948927779694  |
| H | -0.90965923906967 | -0.39835096152398 | 4.36821283700900  |
| C | -4.66503894573643 | 0.13876642341729  | -2.84742999656283 |
| H | -5.12723074422236 | 0.22114369817288  | -3.83378830079824 |
| C | -3.29438876483827 | 0.18985758193053  | -2.71714841453303 |
| H | -2.63062736569813 | 0.31058390688473  | -3.57489552926670 |
| C | -5.47272791218409 | -0.02147137675281 | -1.70540289848055 |
| H | -6.55936522371720 | -0.06262300593541 | -1.80961757928332 |
| C | -2.81815104016606 | -0.42358703094114 | 3.39390639382337  |
| H | -3.35594621564325 | -0.56409528987764 | 4.33407599729057  |
| C | 5.03510213190868  | 0.70998763255351  | 2.38794405547124  |
| F | 5.87053415810790  | -0.34108507353459 | 2.30043147417139  |
| F | 5.42684142971913  | 1.61602395142499  | 1.49313871039609  |

F 5.25548726456918 1.24603576512857 3.59315277976539

[2-trifluoromethyl-pBiphe-H]<sup>+</sup> (**30**), S<sub>0,eq</sub> in vacuum

|   |                   |                   |                   |
|---|-------------------|-------------------|-------------------|
| N | 1.31049835673406  | 0.00396068648693  | -1.36473937589397 |
| C | 1.45078801270644  | 0.05192908707451  | 1.05828379941658  |
| C | 0.75058850923482  | 0.01150475002793  | -0.18383152640253 |
| C | 3.49543452441999  | 0.07853815184991  | -0.29391267829005 |
| C | 0.74654384612761  | 0.05679863546085  | 2.29330465651401  |
| C | 2.86653147563886  | 0.08670044986824  | 1.00564950568636  |
| C | 2.66382880799204  | 0.03633971035577  | -1.45426011435227 |
| C | 3.57965000978213  | 0.12708364411601  | 2.22211657462957  |
| H | 4.66926056487622  | 0.15456870334203  | 2.22366636019446  |
| C | 4.89238593149697  | 0.11022033723404  | -0.47689504836625 |
| H | 5.56393265413992  | 0.14345424640143  | 0.38020843797659  |
| C | 1.49674481830749  | 0.09729565412899  | 3.46314848673848  |
| H | 1.00686597250716  | 0.10286497529998  | 4.43702088599946  |
| C | 4.61223663195762  | 0.05933186374932  | -2.89062015782394 |
| H | 5.06503963525747  | 0.05376526476422  | -3.88407521072949 |
| C | 3.24753311148400  | 0.02764648893721  | -2.74454548796590 |
| H | 2.58091123326030  | -0.00430964002814 | -3.60743992992768 |
| C | 5.43582512946561  | 0.10046519814789  | -1.74406706468488 |
| C | 2.89858022289687  | 0.13200299204540  | 3.42299693495453  |
| H | 3.45681478093379  | 0.16337812450202  | 4.36070997268411  |
| N | -1.33200657989649 | -0.06166290981484 | -1.32155624358548 |
| C | -1.43286771666894 | -0.02087625835028 | 1.05383182541605  |
| C | -0.70643969900598 | -0.02470322893691 | -0.15783850105775 |
| C | -3.50187935040838 | -0.09768003987723 | -0.30569152322937 |
| C | -0.72444799477885 | 0.01955051111566  | 2.29255974193213  |
| C | -2.85719374179160 | -0.05783737120427 | 0.99329285582670  |
| C | -2.69654626047418 | -0.09869166017176 | -1.47228528946057 |
| C | -3.56656521245136 | -0.05367916852666 | 2.20462228698735  |
| H | -4.65562953156092 | -0.08092026755098 | 2.21012440783198  |
| C | -4.89886584622869 | -0.13604197401984 | -0.48674267906036 |

|   |                   |                   |                   |
|---|-------------------|-------------------|-------------------|
| H | -5.55838306276753 | -0.13682221069864 | 0.38095992386398  |
| C | -1.48286016164699 | 0.02151629143810  | 3.45736979721342  |
| H | -0.99871754320867 | 0.05134281858043  | 4.43317078333416  |
| C | -4.63050468593363 | -0.17306379013691 | -2.89351560838242 |
| H | -5.07803072162276 | -0.20238675499966 | -3.88879656081739 |
| C | -3.25750920447787 | -0.13616717199696 | -2.75854897149545 |
| H | -2.60475627420047 | -0.13571891911773 | -3.63436530879413 |
| C | -5.45195424789097 | -0.17292351965937 | -1.75252417480794 |
| H | -6.53707238941567 | -0.20219769193379 | -1.86738802385144 |
| C | -2.88196279748301 | -0.01466007333817 | 3.40725913854298  |
| H | -3.44479788146658 | -0.01188478824150 | 4.34319334987750  |
| C | 6.93286012121222  | 0.12902949999764  | -1.93860190665613 |
| F | 7.58178838075548  | 0.20048515281978  | -0.77802261026216 |
| F | 7.34247543551463  | -0.96799578119092 | -2.57391843486604 |
| F | 7.28884697648912  | 1.17910482437161  | -2.67694384884601 |
| H | -0.70147423981132 | -0.06065484232133 | -2.13236344601082 |

2-nitro-pBiphe (**31**), S<sub>0,eq</sub> in vacuum

|   |                  |                  |                   |
|---|------------------|------------------|-------------------|
| N | 1.31679817547392 | 0.00405897696957 | -1.44510767833416 |
| C | 1.44291197865486 | 0.04736483264738 | 0.97040643248975  |
| C | 0.72750864049747 | 0.00838850371636 | -0.28234798963693 |
| C | 3.50448022444707 | 0.07817680053451 | -0.36164920422993 |
| C | 0.75189068241138 | 0.05006614131280 | 2.21371062521373  |
| C | 2.86090851850798 | 0.08329373274008 | 0.93291633018922  |
| C | 2.67173533265068 | 0.03747590328624 | -1.51490571542290 |
| C | 3.57856477060730 | 0.12207057776447 | 2.14268840154859  |
| H | 4.66837829847325 | 0.15006651359022 | 2.13455099361095  |
| C | 4.89846457755200 | 0.11101523154935 | -0.53531932165995 |
| H | 5.59112889034744 | 0.14287032729524 | 0.30444629871225  |
| C | 1.50556514436411 | 0.08928516396977 | 3.38364100995968  |
| H | 1.01302185059008 | 0.09297882387057 | 4.35572606078366  |
| C | 4.62484497176088 | 0.06316301898355 | -2.96127367724431 |
| H | 5.10275682951297 | 0.05891882198434 | -3.94050444515486 |

|   |                   |                   |                   |
|---|-------------------|-------------------|-------------------|
| C | 3.25899796659555  | 0.03081936910430  | -2.80441739109456 |
| H | 2.58118617960165  | -0.00089149328028 | -3.65860871160852 |
| C | 5.42662065597919  | 0.10311375339329  | -1.80913489345615 |
| C | 2.90313805199630  | 0.12487713851094  | 3.34702730746029  |
| H | 3.46336546740284  | 0.15518113546458  | 4.28407083336797  |
| N | -1.37111601078433 | -0.06270605229882 | -1.40838484192618 |
| C | -1.43941376760808 | -0.02607494697484 | 1.00647196675819  |
| C | -0.75420109005256 | -0.02882335512768 | -0.26216346536912 |
| C | -3.53555496994278 | -0.10005929183680 | -0.27488230193295 |
| C | -0.71986885398585 | 0.01196497550986  | 2.23263299309682  |
| C | -2.85830296943832 | -0.06264078893945 | 1.00119928759252  |
| C | -2.72915682597627 | -0.09788042901562 | -1.44652029199403 |
| C | -3.54358456697145 | -0.06098652634376 | 2.23223152185363  |
| H | -4.63314355200460 | -0.08870557384374 | 2.25242322182763  |
| C | -4.93760111468793 | -0.13818628272659 | -0.42302331767955 |
| H | -5.58046290724705 | -0.14074968445613 | 0.45839305044177  |
| C | -1.44262589210976 | 0.01178187324232  | 3.42178804823449  |
| H | -0.92639928453600 | 0.03994596677290  | 4.38117728772920  |
| C | -4.71665502711991 | -0.17039211355094 | -2.83520853467866 |
| H | -5.18600773868940 | -0.19784325598924 | -3.82116897339205 |
| C | -3.34446118131241 | -0.13358134579100 | -2.72025896605998 |
| H | -2.68553648900669 | -0.13045071842766 | -3.59012163854186 |
| C | -5.51687579292678 | -0.17263458522333 | -1.67662816291697 |
| H | -6.60502281918355 | -0.20182612005247 | -1.76837478068786 |
| C | -2.84121155150254 | -0.02439708276160 | 3.41976582410381  |
| H | -3.37886745413229 | -0.02350960557640 | 4.37045306460780  |
| N | 6.88552830822320  | 0.13790372759261  | -1.96200068721047 |
| O | 7.32632681708131  | 0.13014590246173  | -3.08993567297554 |
| O | 7.55634752648717  | 0.17211203994940  | -0.95307989637446 |

10-nitro-pBiphe (**32**),  $S_{0,eq}$  in vacuum

|   |                  |                  |                   |
|---|------------------|------------------|-------------------|
| N | 1.36176638312598 | 0.16660936515791 | -1.36436888179944 |
| C | 1.45853083055587 | 0.06917907906852 | 1.04624814675284  |

|   |                   |                   |                   |
|---|-------------------|-------------------|-------------------|
| C | 0.7565502385887   | 0.08896854784722  | -0.21635064510184 |
| C | 3.54488374854528  | 0.07779741782602  | -0.26202171475460 |
| C | 0.73961235188392  | -0.01336179420658 | 2.27291005880689  |
| C | 2.87923709364069  | 0.16001125705730  | 1.02048228614339  |
| C | 2.71828958881526  | 0.13477851297700  | -1.41972039580181 |
| C | 3.52258812498567  | 0.28505496431909  | 2.27252034397560  |
| C | 4.93141977502109  | -0.11936669847671 | -0.44667121566304 |
| H | 5.59572111786550  | -0.27381454317924 | 0.40121047339308  |
| C | 1.45879234958723  | -0.00470653650640 | 3.46515279424103  |
| H | 0.95016043231487  | -0.08618688724809 | 4.42449823226125  |
| C | 4.66632799083075  | -0.02956134861461 | -2.85417930165594 |
| H | 5.11360277325061  | -0.05879049474376 | -3.85028495105076 |
| C | 3.30466873097036  | 0.10967541105738  | -2.70674405903221 |
| H | 2.62667852373459  | 0.17726063277352  | -3.55896093654528 |
| C | 5.47797677148069  | -0.17060506941495 | -1.71377382448453 |
| H | 6.55251443963022  | -0.33028198660368 | -1.82593642119251 |
| C | 2.84124351741327  | 0.15738415533737  | 3.46579195931408  |
| H | 3.39842595928267  | 0.22184239641360  | 4.40154516158008  |
| N | -1.32443500267745 | 0.08530325674798  | -1.37915729936486 |
| C | -1.43047303046740 | -0.06901038135100 | 1.02704582389043  |
| C | -0.72485529113776 | 0.03894058347353  | -0.22458404382639 |
| C | -3.50554869112320 | -0.08394631858923 | -0.28905769414229 |
| C | -0.72943228413130 | -0.10638855106277 | 2.26272396096513  |
| C | -2.84739863542815 | -0.13916054864233 | 0.99622285392546  |
| C | -2.68135876499508 | 0.03258989113450  | -1.44214185403694 |
| C | -3.54813359379260 | -0.25829271189391 | 2.21258889971725  |
| H | -4.63676095659517 | -0.31601702650076 | 2.21341781802523  |
| C | -4.90415102456885 | -0.13672189529104 | -0.46238835642316 |
| H | -5.55963228959385 | -0.22613664119132 | 0.40518222729931  |
| C | -1.46693874169397 | -0.22661784715910 | 3.43735347716073  |
| H | -0.96656211177514 | -0.26334628306416 | 4.40463045372567  |
| C | -4.64673448303332 | 0.04140974322408  | -2.86398702969711 |
| H | -5.10051935163772 | 0.08946819606894  | -3.85645815525626 |

|   |                   |                   |                   |
|---|-------------------|-------------------|-------------------|
| C | -3.27720199920779 | 0.09388151151705  | -2.72392555567717 |
| H | -2.60579640334390 | 0.18295199383913  | -3.57956708824017 |
| C | -5.46428675574999 | -0.07511355295383 | -1.72364242515777 |
| H | -6.55010659233746 | -0.11695687588833 | -1.83558772613552 |
| C | -2.86324580267331 | -0.30379868230786 | 3.41021706010187  |
| H | -3.41322177533160 | -0.39863253209671 | 4.34897781942766  |
| N | 4.92663352046751  | 0.68128579585719  | 2.40023340142720  |
| O | 5.63204973548075  | 0.00544590936474  | 3.11761197854769  |
| O | 5.26511479855337  | 1.68617658592433  | 1.82014434435767  |

2-amino-2'-trifluoromethyl-pBiphe (**33**),  $S_{0,eq}$  in vacuum

|   |                   |                   |                   |
|---|-------------------|-------------------|-------------------|
| N | 1.33683803993489  | 0.02096540830473  | -1.43561598650288 |
| C | 1.44390817764916  | 0.01325951928588  | 0.97436700462633  |
| C | 0.73284633658784  | 0.00419931080513  | -0.27890038459339 |
| C | 3.52373085555187  | 0.06268984778862  | -0.34194303360061 |
| C | 0.74768098627392  | -0.00691707785026 | 2.21503086328967  |
| C | 2.86368361228614  | 0.04203515068588  | 0.94577338485198  |
| C | 2.68800265604454  | 0.04922923823445  | -1.49423167965526 |
| C | 3.56920081987909  | 0.04827905881476  | 2.16460885840364  |
| H | 4.65928362178681  | 0.06783422520734  | 2.16506204210251  |
| C | 4.91751974902654  | 0.09798719964575  | -0.50638494555057 |
| H | 5.57234341471674  | 0.10958194297495  | 0.36697971200377  |
| C | 1.49129747283372  | 0.00113234348352  | 3.39160543487425  |
| H | 0.99062412235599  | -0.01410822320160 | 4.35955908089794  |
| C | 4.65761876944563  | 0.09873985742595  | -2.91654731534708 |
| H | 5.10868892349566  | 0.10822878954367  | -3.91241387709255 |
| C | 3.29410745870971  | 0.06783162869040  | -2.77480566655594 |
| H | 2.62817459768868  | 0.05712473952483  | -3.63937156248324 |
| C | 5.50149269006627  | 0.11563908409459  | -1.77309720893416 |
| C | 2.88944358071702  | 0.02806465994299  | 3.36588105343744  |
| H | 3.44409021608083  | 0.03257373784764  | 4.30680863274116  |
| N | -1.35986252970889 | -0.03472527148025 | -1.42399302068806 |
| C | -1.43880742181438 | -0.04352854467372 | 0.99305043060770  |

|   |                   |                   |                   |
|---|-------------------|-------------------|-------------------|
| C | -0.74531068916009 | -0.02567065499889 | -0.27373946694872 |
| C | -3.52760933347669 | -0.07744767171786 | -0.29829056413007 |
| C | -0.72463374948502 | -0.03541771907110 | 2.22360779244509  |
| C | -2.85803013398073 | -0.07034074486717 | 0.98272851017028  |
| C | -2.71691841733213 | -0.06003469966765 | -1.46409694406299 |
| C | -3.55105456861617 | -0.08924573255383 | 2.20806744248737  |
| H | -4.64092609716117 | -0.11036578241070 | 2.22223426864447  |
| C | -4.92833508216757 | -0.10105803688279 | -0.44738771883015 |
| H | -5.57792077192896 | -0.11525635431498 | 0.42736921921465  |
| C | -1.45545902478028 | -0.05489611642368 | 3.40883748365879  |
| H | -0.94354605156599 | -0.04968970127899 | 4.37086998424468  |
| C | -4.70204929605414 | -0.09404776074312 | -2.86186610630641 |
| H | -5.17186382651738 | -0.10428501942721 | -3.84760814569522 |
| C | -3.33308649505152 | -0.06972398436521 | -2.73956400441273 |
| H | -2.67408147184447 | -0.05802569516842 | -3.60898868074122 |
| C | -5.50469702469982 | -0.10874130127197 | -1.70168096698533 |
| C | -2.85334405813771 | -0.08161492020523 | 3.39943741836139  |
| H | -3.39592079018453 | -0.09673915702769 | 4.34732474565781  |
| N | 6.86289872411208  | 0.10864558039024  | -1.93316378819207 |
| H | 7.23556188450093  | 0.38455196130308  | -2.83048037739876 |
| H | 7.43782171821961  | 0.35463351156284  | -1.13990488140301 |
| C | -6.99750942962868 | -0.11821350264053 | -1.86156383984213 |
| F | -7.43198264188627 | 1.00196968852791  | -2.45214655225146 |
| F | -7.63373616913288 | -0.22274419271792 | -0.69131719519359 |
| F | -7.40007335364814 | -1.13785861912433 | -2.62889944932332 |

2-amino-2'-trifluoromethyl-pBiphe (**33**),  $S_{0,eq}$  in chloroform

|   |                  |                  |                   |
|---|------------------|------------------|-------------------|
| N | 1.33830544373105 | 0.01938522106546 | -1.43474213014577 |
| C | 1.44283911980033 | 0.02479271805760 | 0.97538989238379  |
| C | 0.73146729774111 | 0.00816869857106 | -0.27598084194069 |
| C | 3.52543951006451 | 0.07121146458534 | -0.34220480143811 |
| C | 0.74694273004604 | 0.00646198006747 | 2.21687751063255  |
| C | 2.86299179653607 | 0.06259735747731 | 0.94614406312384  |

|   |                   |                   |                   |
|---|-------------------|-------------------|-------------------|
| C | 2.68910564770150  | 0.04654898864137  | -1.49671044581019 |
| C | 3.56994705923173  | 0.08942314186497  | 2.16440763401649  |
| H | 4.66010395168345  | 0.11914964840174  | 2.16416401421608  |
| C | 4.91822889303321  | 0.10302010030814  | -0.50205367439325 |
| H | 5.57302430226662  | 0.12371356366566  | 0.37100935468298  |
| C | 1.49041451353969  | 0.03878972915714  | 3.39396449995461  |
| H | 0.99159654322416  | 0.03391248192932  | 4.36324990524689  |
| C | 4.66102977707320  | 0.08136342133589  | -2.91872015665123 |
| H | 5.11628149652711  | 0.08484328193982  | -3.91270914902191 |
| C | 3.29795862288761  | 0.05344538027084  | -2.77785670927235 |
| H | 2.63943656974179  | 0.03651377539329  | -3.64908452704229 |
| C | 5.50683525056821  | 0.10595380750895  | -1.77215189705580 |
| C | 2.88894128146684  | 0.08025440954119  | 3.36614582928384  |
| H | 3.44333097733071  | 0.10470273804651  | 4.30713684871032  |
| N | -1.36132409538633 | -0.01721778774118 | -1.42397623134063 |
| C | -1.43882254767253 | -0.04981550741772 | 0.99349156294276  |
| C | -0.74512159156883 | -0.01918407098829 | -0.27176406065494 |
| C | -3.52840697327734 | -0.08254865951856 | -0.29959130675784 |
| C | -0.72476446008772 | -0.04492645195869 | 2.22484958431165  |
| C | -2.85843715553965 | -0.08825304691226 | 0.98239169367088  |
| C | -2.71973659569331 | -0.04423200952734 | -1.46645132520880 |
| C | -3.55290928429571 | -0.12921413249859 | 2.20638323436812  |
| H | -4.64280271646231 | -0.16012033300620 | 2.22027972838841  |
| C | -4.92952777489501 | -0.11026988466063 | -0.44496559134508 |
| H | -5.57224681903131 | -0.14020625305495 | 0.43466930303014  |
| C | -1.45581200883709 | -0.09066031245175 | 3.41014028777660  |
| H | -0.94612442824796 | -0.09639145066933 | 4.37360981012101  |
| C | -4.70669785921168 | -0.06049513569911 | -2.86250454407484 |
| H | -5.17538157482773 | -0.05241034385458 | -3.84934577420594 |
| C | -3.33712974189983 | -0.03417601453240 | -2.74135738346784 |
| H | -2.68652068814166 | -0.00503005031978 | -3.61746897567718 |
| C | -5.50606371860128 | -0.09895706683291 | -1.70023812618661 |
| C | -2.85384960469370 | -0.13255691117622 | 3.39809601751333  |



|   |                   |                   |                   |
|---|-------------------|-------------------|-------------------|
| H | -3.39620959977742 | -0.16779743248779 | 4.34580043931904  |
| N | 6.85694209303721  | 0.09903269668440  | -1.93008666374586 |
| H | 7.24617969949086  | 0.30224386524384  | -2.84148201412680 |
| H | 7.44993388953385  | 0.30096711671191  | -1.13552662722700 |
| C | -6.99726390496550 | -0.11623608662658 | -1.85918685366638 |
| F | -7.44280178804170 | 0.99777976570047  | -2.45836212846240 |
| F | -7.63833206608135 | -0.21643971835521 | -0.69135730162792 |
| F | -7.40088946901988 | -1.14263669187959 | -2.62112197314571 |

2-amino-2'-trifluoromethyl-pBiphe (**33**), S<sub>0,eq</sub> in methanol

|   |                   |                   |                   |
|---|-------------------|-------------------|-------------------|
| N | 1.33959367545065  | 0.02012501303796  | -1.43703625975121 |
| C | 1.44194287014032  | 0.02882083302891  | 0.97344362943775  |
| C | 0.73069436073653  | 0.01016256339210  | -0.27727412314876 |
| C | 3.52619425236939  | 0.07564709934414  | -0.34274256928883 |
| C | 0.74633280899773  | 0.01031686066578  | 2.21510300466767  |
| C | 2.86210401625254  | 0.06946456232476  | 0.94496312096980  |
| C | 2.69026070894756  | 0.04772744960066  | -1.49844839516262 |
| C | 3.56919450682100  | 0.10123351488622  | 2.16293977594294  |
| H | 4.65947162887856  | 0.13387033117530  | 2.16357135688455  |
| C | 4.91824540022245  | 0.10720989264370  | -0.49910003628935 |
| H | 5.57220576094699  | 0.13046640289101  | 0.37458888281644  |
| C | 1.48910584171893  | 0.04833596328472  | 3.39257751425900  |
| H | 0.99083198956298  | 0.04518563327656  | 4.36235056965920  |
| C | 4.66497776646100  | 0.07976374315825  | -2.91786644750735 |
| H | 5.12226827192524  | 0.08182643956756  | -3.91102897918297 |
| C | 3.30224292804080  | 0.05186701150112  | -2.77876008699181 |
| H | 2.64862260899433  | 0.03279932405505  | -3.65405216826774 |
| C | 5.51030267113930  | 0.10674470782079  | -1.76948589473711 |
| C | 2.88751917896048  | 0.09398089144895  | 3.36450420658285  |
| H | 3.44166930460650  | 0.12307875538823  | 4.30567284847243  |
| N | -1.36246834207975 | -0.01234654754425 | -1.42672353753903 |
| C | -1.43836337447473 | -0.05131212689645 | 0.99120859574160  |
| C | -0.74487468490022 | -0.01714471599313 | -0.27356330837835 |

|   |                   |                   |                   |
|---|-------------------|-------------------|-------------------|
| C | -3.52868702789430 | -0.08424407716428 | -0.30075431391293 |
| C | -0.72451114382877 | -0.04715937709176 | 2.22277358395471  |
| C | -2.85804158589343 | -0.09308873109057 | 0.98076276353268  |
| C | -2.72172570188610 | -0.04027287558538 | -1.46816461567151 |
| C | -3.55265612668408 | -0.13982492021845 | 2.20418394925477  |
| H | -4.64261429922975 | -0.17346454917021 | 2.21913667854417  |
| C | -4.93006922820543 | -0.11352756808644 | -0.44310621187915 |
| H | -5.56944910006576 | -0.14781167697003 | 0.43894648066403  |
| C | -1.45504392713207 | -0.09961362653935 | 3.40823188670910  |
| H | -0.94602523069839 | -0.10774061842961 | 4.37222409405277  |
| C | -4.71127702720142 | -0.05287081647332 | -2.86105034006382 |
| H | -5.17969658582493 | -0.04048937164089 | -3.84819447037646 |
| C | -3.34146192711651 | -0.02549381230902 | -2.74172977023622 |
| H | -2.69603583323657 | 0.00829372663860  | -3.62180461904203 |
| C | -5.50834793002896 | -0.09759058586161 | -1.69761142164060 |
| C | -2.85287669642793 | -0.14571099506147 | 3.39568072686609  |
| H | -3.39502202198253 | -0.18609312769721 | 4.34347143653720  |
| N | 6.85564268526731  | 0.10465160291890  | -1.92496556605573 |
| H | 7.25353718531004  | 0.26497297011193  | -2.84150799971967 |
| H | 7.45592370766009  | 0.27326661465979  | -1.12761075335495 |
| C | -6.99906058501827 | -0.11641629351485 | -1.85465116114706 |
| F | -7.44737429462709 | 0.99886127273344  | -2.45092123833816 |
| F | -7.64010354499433 | -0.22055582962646 | -0.68751449366044 |
| F | -7.40299790997934 | -1.14140093658967 | -2.61946632420587 |

2-amino-2'-trifluoromethyl-pBiphe (**33**),  $S_{0,eq}$  in dimethyl sulfoxide

|   |                  |                  |                   |
|---|------------------|------------------|-------------------|
| N | 1.33900014233721 | 0.02231564095081 | -1.43590611782161 |
| C | 1.44206824904136 | 0.02905453565360 | 0.97463277455786  |
| C | 0.73066346045443 | 0.01108277352444 | -0.27612028057012 |
| C | 3.52589688183046 | 0.07692136592109 | -0.34233782255347 |
| C | 0.74636430826890 | 0.00996565089781 | 2.21620547006782  |
| C | 2.86217231169788 | 0.06962704193992 | 0.94568764062916  |
| C | 2.68920031461120 | 0.05022011261121 | -1.49808357586991 |

|   |                   |                   |                   |
|---|-------------------|-------------------|-------------------|
| C | 3.56945900808372  | 0.10035522794549  | 2.16353787301186  |
| H | 4.65968165061523  | 0.13286815606207  | 2.16354757979059  |
| C | 4.91763797155514  | 0.10831181619824  | -0.49938796941424 |
| H | 5.57225083782913  | 0.13047955237195  | 0.37378970026795  |
| C | 1.48939737359250  | 0.04689466532521  | 3.39355204099367  |
| H | 0.99103245422769  | 0.04305999244677  | 4.36320540607466  |
| C | 4.66279524647539  | 0.08348498340198  | -2.91902270374614 |
| H | 5.12017954787935  | 0.08657161897022  | -3.91201532974353 |
| C | 3.30026843699103  | 0.05560412403066  | -2.77908486239479 |
| H | 2.64503264718788  | 0.03733182021677  | -3.65311557318725 |
| C | 5.50900773549584  | 0.10914886324528  | -1.77064995818708 |
| C | 2.88785617138450  | 0.09222410275040  | 3.36519915412176  |
| H | 3.44207788189190  | 0.12042979250259  | 4.30619163824715  |
| N | -1.36213051728632 | -0.01310765716514 | -1.42559510273243 |
| C | -1.43866634769882 | -0.05104732774869 | 0.99246559784650  |
| C | -0.74510021012109 | -0.01706350420634 | -0.27243940577409 |
| C | -3.52855578390922 | -0.08432861360090 | -0.30018506058741 |
| C | -0.72462264987584 | -0.04685978465056 | 2.22389723626512  |
| C | -2.85829747905109 | -0.09265183274283 | 0.98162220631375  |
| C | -2.72105152217736 | -0.04121178870760 | -1.46765890206729 |
| C | -3.55305245160314 | -0.13881994276385 | 2.20494008241276  |
| H | -4.64296175849689 | -0.17225185922504 | 2.21932471617124  |
| C | -4.92977397712523 | -0.11339978240965 | -0.44332830474802 |
| H | -5.56974821289414 | -0.14692015771137 | 0.43831583408799  |
| C | -1.45536656962899 | -0.09870439241925 | 3.40925935407912  |
| H | -0.94622880873680 | -0.10658373031062 | 4.37311993974014  |
| C | -4.70966645030460 | -0.05453549078923 | -2.86162684654593 |
| H | -5.17834157550754 | -0.04281389982603 | -3.84856428271784 |
| C | -3.33991212143540 | -0.02730472192989 | -2.74183040725851 |
| H | -2.69298999930985 | 0.00578669283295  | -3.62075413994599 |
| C | -5.50703133799392 | -0.09819483076728 | -1.69833943309244 |
| C | -2.85324466680831 | -0.14439846622558 | 3.39648093600018  |
| H | -3.39537773758982 | -0.18426425089612 | 4.34414275074836  |

|   |                   |                   |                   |
|---|-------------------|-------------------|-------------------|
| N | 6.85314892116252  | 0.10904155203901  | -1.92690772913529 |
| H | 7.25332618838701  | 0.25614962096582  | -2.84450648839447 |
| H | 7.45685444681308  | 0.26386390386579  | -1.12951736264262 |
| C | -6.99748944683384 | -0.11698133902802 | -1.85639516779812 |
| F | -7.44503510709229 | 0.99668143337547  | -2.45613644688162 |
| F | -7.63940569791189 | -0.21776005182272 | -0.68957032389510 |
| F | -7.40122175842088 | -1.14377161509880 | -2.61883833372233 |

2-amino-2'-trifluoromethyl-pBiphe (**33**),  $S_{0,eq}$  in water

|   |                   |                   |                   |
|---|-------------------|-------------------|-------------------|
| N | 1.34227130513073  | 0.01615920751942  | -1.44222102849378 |
| C | 1.44120858373084  | 0.02843919082083  | 0.96842697109931  |
| C | 0.73095192305423  | 0.00850091662496  | -0.28277876288596 |
| C | 3.52711379415062  | 0.07327257839615  | -0.34395344460504 |
| C | 0.74603226883323  | 0.01098840601795  | 2.21008435865053  |
| C | 2.86118091321796  | 0.06922920942536  | 0.94214559762265  |
| C | 2.69394984147986  | 0.04319069465780  | -1.50083120288278 |
| C | 3.56781790228925  | 0.10294995095689  | 2.16024683452768  |
| H | 4.65781244541566  | 0.13576090728276  | 2.16010319598804  |
| C | 4.91963129493387  | 0.10501211545151  | -0.49600463934439 |
| H | 5.57081105242474  | 0.13062402322569  | 0.37946253690560  |
| C | 1.48754504782185  | 0.05104446384611  | 3.38815394996390  |
| H | 0.98751042137517  | 0.04894741550349  | 4.35671954120365  |
| C | 4.67334685376937  | 0.07311991910863  | -2.91387844031950 |
| H | 5.13424747491789  | 0.07401581692310  | -3.90501195345561 |
| C | 3.31014246945505  | 0.04532071658113  | -2.77891523374337 |
| H | 2.66165234229365  | 0.02525706977856  | -3.65735189569061 |
| C | 5.51498948351447  | 0.10187028061166  | -1.76385740651793 |
| C | 2.88583486994371  | 0.09734152211054  | 3.36150024907603  |
| H | 3.43910205353772  | 0.12807353354248  | 4.30261694200721  |
| N | -1.36443489284618 | -0.01082510153460 | -1.43199841102018 |
| C | -1.43721817376768 | -0.05192336955211 | 0.98596583327501  |
| C | -0.74457341977186 | -0.01729602795542 | -0.27909866471546 |
| C | -3.52901965500706 | -0.08423272419453 | -0.30248151250555 |

|   |                   |                   |                   |
|---|-------------------|-------------------|-------------------|
| C | -0.72400348150514 | -0.04781098186608 | 2.21764935551308  |
| C | -2.85670188325602 | -0.09406579727482 | 0.97753113215011  |
| C | -2.72462309787593 | -0.03846378725821 | -1.47086217384746 |
| C | -3.55101234138395 | -0.14180409787154 | 2.20097935068973  |
| H | -4.64069689247809 | -0.17563213832244 | 2.21509522236440  |
| C | -4.93075969816370 | -0.11399646526400 | -0.44048464562796 |
| H | -5.56738039058962 | -0.14997036836173 | 0.44330185039356  |
| C | -1.45344800734704 | -0.10141503065871 | 3.40357960284879  |
| H | -0.94287465609609 | -0.10978916781875 | 4.36644484452924  |
| C | -4.71827594430667 | -0.04948761104931 | -2.85824807269599 |
| H | -5.18993442905902 | -0.03579914661135 | -3.84347259630398 |
| C | -3.34820079358234 | -0.02189000367951 | -2.74235482279842 |
| H | -2.70761438805844 | 0.01333191231260  | -3.62526223394342 |
| C | -5.51217819319178 | -0.09635231923056 | -1.69311316744150 |
| C | -2.85113033091871 | -0.14826976379832 | 3.39227116715429  |
| H | -3.39246417181231 | -0.18951388861965 | 4.33997411544870  |
| N | 6.86211816450326  | 0.09606285537051  | -1.91568890631371 |
| H | 7.25379494849911  | 0.28075931219831  | -2.83031424723625 |
| H | 7.45158818997000  | 0.29021426005787  | -1.11613960656962 |
| C | -7.00279668084412 | -0.11559035477015 | -1.84646032687354 |
| F | -7.45278527575431 | 1.00043012219409  | -2.43963458093177 |
| F | -7.64063348902930 | -0.22230299203702 | -0.67812514227458 |
| F | -7.40779335761678 | -1.13898526278956 | -2.61250953237313 |

2-amino-2'-nitro-pBiphe (**34**),  $S_{0,eq}$  in vacuum

|   |                   |                   |                   |
|---|-------------------|-------------------|-------------------|
| C | -7.27509073098088 | -2.69077705377488 | -0.02264918001908 |
| C | -5.90606288701402 | -2.56216824228561 | -0.02719021616224 |
| C | -5.29061664473545 | -1.28527034407135 | -0.01469446603265 |
| C | -6.10140463692517 | -0.11542725400523 | 0.00279209542331  |
| C | -7.49845466628309 | -0.26003821299720 | 0.00726514581456  |
| C | -8.05441905760497 | -1.52259718663436 | -0.00526225120573 |
| C | -5.43114160213831 | 1.16617561023929  | 0.01508073749669  |
| C | -4.01215137406299 | 1.17447981151680  | 0.00889682307565  |

|   |                   |                   |                   |
|---|-------------------|-------------------|-------------------|
| C | -3.31995699767026 | -0.09333455220262 | -0.00930011303589 |
| C | -3.29667683495077 | 2.40398719722683  | 0.02038384832750  |
| C | -4.02766168906382 | 3.58957860586085  | 0.03770082934229  |
| C | -5.42545536684122 | 3.58110099866826  | 0.04375610590240  |
| C | -6.12467011831834 | 2.38999280576736  | 0.03269914319702  |
| H | -7.77261204321832 | -3.66014782590791 | -0.03203511118307 |
| H | -5.24576419698672 | -3.43046464849003 | -0.04053744009378 |
| H | -8.17355334271889 | 0.59443956289846  | 0.02038673130480  |
| H | -3.51547845575333 | 4.55142366276320  | 0.04685879082557  |
| H | -5.96759023339644 | 4.52918651422349  | 0.05738138852400  |
| H | -7.21478741079244 | 2.40358083814675  | 0.03765591242948  |
| C | -1.84279186732019 | -0.09925722713172 | -0.01598719653244 |
| C | -1.13010513622964 | 1.15256025443360  | -0.00357115358477 |
| C | 0.10995198930116  | -1.31850044989622 | -0.03957615987534 |
| C | 0.28984345516934  | 1.12161872926483  | -0.00976774247358 |
| C | -1.82458211604345 | 2.39404472190633  | 0.01386798814264  |
| C | 0.71382387226749  | -2.60063995236876 | -0.05774330698053 |
| C | 0.94803177538873  | -0.16705477848811 | -0.02736479839129 |
| C | 0.99712995709273  | 2.33940170729807  | 0.00045045259201  |
| C | -1.07932784537876 | 3.56951119684187  | 0.02407396215298  |
| C | 2.07696192107267  | -2.74474904445769 | -0.06330227809320 |
| H | 0.04620861999930  | -3.46390240395162 | -0.06639874274746 |
| C | 2.34141847683662  | -0.33412243992709 | -0.02991370020118 |
| C | 0.31905274294465  | 3.54173351484015  | 0.01714304807509  |
| H | 2.08733520851534  | 2.33839981463397  | -0.00594009806739 |
| H | -1.57850655379883 | 4.53828290605177  | 0.03722892989852  |
| C | 2.92315382731893  | -1.60240738251109 | -0.04832984969365 |
| H | 2.52658266773419  | -3.74108272232314 | -0.08177392788484 |
| H | 2.99822685919041  | 0.53770936212130  | -0.02011805996350 |
| H | 0.87504744293041  | 4.48177925668921  | 0.02458783601805  |
| N | -3.93514324717463 | -1.24466153384678 | -0.02016674027197 |
| N | -1.24033389141786 | -1.25756415159315 | -0.03332982722600 |
| N | 4.28217379785432  | -1.76400168064175 | -0.09088996435765 |

|   |                    |                   |                   |
|---|--------------------|-------------------|-------------------|
| H | 4.86754324958775   | -0.97534702883771 | 0.14448640941361  |
| H | 4.66320219579486   | -2.66822342620707 | 0.14804899638442  |
| N | -9.51487400447611  | -1.64477785890694 | -0.00015049341297 |
| O | -10.16635375343525 | -0.62221293030209 | 0.01489334076111  |
| O | -9.98012135426863  | -2.76345673963227 | -0.01134569761149 |

10-amino-10'-trifluoromethyl-pBiphe (**35**), S<sub>0,eq</sub> in vacuum

|   |                   |                   |                   |
|---|-------------------|-------------------|-------------------|
| N | 1.34560539987128  | -0.01410119629533 | -1.36835638645241 |
| C | 1.44193216580586  | 0.08300516042793  | 1.04136176883173  |
| C | 0.74169237973382  | 0.00149634650684  | -0.21664485851103 |
| C | 3.52625464271324  | -0.00075090982133 | -0.25375364429296 |
| C | 0.70565761157344  | 0.09823451585558  | 2.25264147431323  |
| C | 2.86068891558460  | 0.18644390454335  | 1.01938630715838  |
| C | 2.70153825920851  | -0.05246324052404 | -1.41704726039651 |
| C | 3.53042322476422  | 0.49308382406560  | 2.24563748582089  |
| C | 4.91653435418773  | -0.20383729166866 | -0.43485493952030 |
| H | 5.56932709646158  | -0.30537459685664 | 0.43020797530403  |
| C | 1.41681125804928  | 0.28834488488322  | 3.43571245574245  |
| H | 0.89901993637409  | 0.32042717501566  | 4.39441844342012  |
| C | 4.64978936612114  | -0.32738728593388 | -2.84174517956459 |
| H | 5.09274060642053  | -0.43940711617303 | -3.83387078158743 |
| C | 3.28705966125248  | -0.18558739377479 | -2.69716943610344 |
| H | 2.60451870585708  | -0.19622702719011 | -3.54862780950132 |
| C | 5.46198420684085  | -0.36392121158323 | -1.69606071166587 |
| H | 6.53659638023323  | -0.53478511181538 | -1.79533134715460 |
| C | 2.78699300231714  | 0.50485764043097  | 3.42823540003922  |
| H | 3.30140530213400  | 0.71876564672845  | 4.36882617790106  |
| N | -1.32059520842403 | -0.01868126955844 | -1.39248328019987 |
| C | -1.47186336377662 | -0.07466358785743 | 1.01662747567383  |
| C | -0.74337340866592 | -0.01698465545507 | -0.22817851119951 |
| C | -3.52448490109603 | 0.02602544738300  | -0.32007722133773 |
| C | -0.74961717324557 | -0.07473975254139 | 2.24323352545170  |
| C | -2.89717954444401 | -0.17218004130936 | 0.97789839430674  |

|   |                   |                   |                   |
|---|-------------------|-------------------|-------------------|
| C | -2.67373375704582 | 0.04112433387518  | -1.46485372655633 |
| C | -3.56274443486686 | -0.46677292261519 | 2.20623845540804  |
| C | -4.89944068962115 | 0.26946643952523  | -0.53904984539588 |
| H | -5.58148944129255 | 0.37995304632260  | 0.29639659744681  |
| C | -1.46582317442767 | -0.25440897743621 | 3.42087742195060  |
| H | -0.95980791217123 | -0.27891343136030 | 4.38516826314383  |
| C | -4.57678763782652 | 0.34717806294816  | -2.94025822695343 |
| H | -4.99431099364720 | 0.45767449438881  | -3.94366302148679 |
| C | -3.22415564072721 | 0.16824481099783  | -2.76207641184278 |
| H | -2.51996480868769 | 0.14700548484075  | -3.59529173186169 |
| C | -5.41183808872856 | 0.42411100184701  | -1.81257146198951 |
| H | -6.47957152339217 | 0.61875805112315  | -1.93626925379563 |
| C | -2.83578564460610 | -0.48408045969758 | 3.38836847246437  |
| H | -3.35065323491643 | -0.71326063509037 | 4.32093242433747  |
| N | 4.87613482972291  | 0.77606406266048  | 2.30227115022146  |
| H | 5.27554295179250  | 1.22656705834861  | 1.48794986905811  |
| H | 5.18708113015943  | 1.18817458136809  | 3.17286572247889  |
| C | -5.01054723356535 | -0.87962591036250 | 2.34185859902965  |
| F | -5.22833541972691 | -1.50134402528131 | 3.50640391651403  |
| F | -5.86138389182554 | 0.16403980525945  | 2.32545360464806  |
| F | -5.39214426045183 | -1.72554772914435 | 1.38466366670489  |

10-amino-10'-nitro-pBiphe (**36**), S<sub>0,eq</sub> in vacuum

|   |                   |                  |                   |
|---|-------------------|------------------|-------------------|
| N | -0.94237955077224 | 1.59402211921743 | -0.01966879128620 |
| C | -0.84725867356560 | 1.62090329461594 | 2.39415702655490  |
| C | -1.54595952917684 | 1.57219024249535 | 1.13209846669919  |
| C | 1.23712027762777  | 1.57014728249666 | 1.09377588557707  |
| C | -1.58015506787388 | 1.60910232465609 | 3.60992833283853  |
| C | 0.57225471324267  | 1.71972905902649 | 2.37227621692759  |
| C | 0.41303358017876  | 1.55982960505776 | -0.07087237418559 |
| C | 1.24733627329425  | 1.98690268973374 | 3.60548424422584  |
| C | 2.62661148990600  | 1.36726862311288 | 0.90567004220694  |
| H | 3.27924159342650  | 1.23160933946754 | 1.76613136220233  |



|   |                   |                   |                   |
|---|-------------------|-------------------|-------------------|
| C | -0.86165184885278 | 1.75196610279055  | 4.79578510383299  |
| H | -1.37354234410088 | 1.74935907007049  | 5.75800831162205  |
| C | 2.36007167582702  | 1.33032283384452  | -1.50450017721336 |
| H | 2.80314768792617  | 1.25207395522636  | -2.49975148845373 |
| C | 0.99783747064453  | 1.47040955387484  | -1.35520632328529 |
| H | 0.31520630236041  | 1.49030660091333  | -2.20641125810943 |
| C | 3.17150769992765  | 1.24979562109100  | -0.36039925526359 |
| H | 4.24536888934767  | 1.07791551667929  | -0.46548031962253 |
| C | 0.50912201295152  | 1.95916135981709  | 4.79136052606779  |
| H | 1.02844799252420  | 2.13470648795543  | 5.73709209069728  |
| N | -3.61747734651134 | 1.54517705151143  | -0.04105176453982 |
| C | -3.74676627270055 | 1.44827275846292  | 2.36722662608490  |
| C | -3.02904538379703 | 1.53312491376706  | 1.11910221785412  |
| C | -5.81446962301872 | 1.51545162031786  | 1.03872879770149  |
| C | -3.03710886310485 | 1.45929467872317  | 3.60238736317282  |
| C | -5.16428398406973 | 1.32996877729158  | 2.31839466033778  |
| C | -4.97332315637486 | 1.57366610543613  | -0.10879007825168 |
| C | -5.81699744318645 | 1.08768142520260  | 3.54897512628042  |
| C | -7.20116011694921 | 1.71326046351554  | 0.85441521327478  |
| H | -7.87672908387167 | 1.77747148386950  | 1.70494039862610  |
| C | -3.76774480093136 | 1.33118596882841  | 4.78344369368650  |
| H | -3.26943384474152 | 1.34057559048232  | 5.75176172923751  |
| C | -6.90653383300240 | 1.85104378798420  | -1.54710174984293 |
| H | -7.34212829660150 | 1.96790083662343  | -2.54202388047287 |
| C | -5.5459099593332  | 1.71153919089746  | -1.39552789082373 |
| H | -4.85690258709800 | 1.72830787789997  | -2.24169537960903 |
| C | -7.73348223684470 | 1.87695293148147  | -0.40893496268793 |
| H | -8.80848695099811 | 2.03472045552902  | -0.51961454644904 |
| C | -5.14381189726650 | 1.13240192286110  | 4.75463838087737  |
| H | -5.70678936987111 | 0.97348730573680  | 5.67551237260962  |
| N | -7.20793477310579 | 0.64368857563858  | 3.63303608310967  |
| O | -7.92084791785683 | 1.19597427212161  | 4.44417126197705  |
| O | -7.53451304179946 | -0.28121424873020 | 2.92503087513069  |

|   |                  |                  |                  |
|---|------------------|------------------|------------------|
| N | 2.59170719084144 | 2.26792011193736 | 3.66653566170889 |
| H | 2.99425089060063 | 2.73370121759635 | 2.86264878350715 |
| H | 2.90894309335019 | 2.65082324287145 | 4.54801338546721 |

2-amino-10<sup>1</sup>-trifluoromethyl-pBiphe (**37**), S<sub>0,eq</sub> in vacuum

|   |                   |                   |                   |
|---|-------------------|-------------------|-------------------|
| N | 1.31345227689395  | -0.16268736440387 | -1.42557754033697 |
| C | 1.41611294507455  | 0.08166208233034  | 0.96731134142239  |
| C | 0.70672745169661  | -0.06994880371525 | -0.27415155145225 |
| C | 3.49728533302278  | 0.05097861454663  | -0.34289165813011 |
| C | 0.71250782091142  | 0.15687434307288  | 2.19829851487431  |
| C | 2.83343089974372  | 0.15850028584858  | 0.93789175720222  |
| C | 2.66470854542062  | -0.11626824580241 | -1.48539803692085 |
| C | 3.52784804806372  | 0.33463856399074  | 2.15015167842702  |
| H | 4.61628610923997  | 0.39931368974990  | 2.15212922936570  |
| C | 4.89041974082621  | 0.10340048926262  | -0.50959826355612 |
| H | 5.54156395577471  | 0.23175487352409  | 0.35725618110562  |
| C | 1.44365920672842  | 0.34062417603076  | 3.36888970929860  |
| H | 0.93764028061081  | 0.42226309774685  | 4.33058498595457  |
| C | 4.63756891041680  | -0.18349028243083 | -2.90263982234897 |
| H | 5.09131447924080  | -0.27894861104368 | -3.89277508356468 |
| C | 3.27451833658059  | -0.23117444406078 | -2.75901696543644 |
| H | 2.61207175963946  | -0.35757888951065 | -3.61705308056389 |
| C | 5.47765229420713  | -0.01196028947436 | -1.76941773765376 |
| C | 2.83918134767049  | 0.43102886153219  | 3.34312585183647  |
| H | 3.38499382554270  | 0.57619538445532  | 4.27794677128316  |
| N | -1.36943645038176 | -0.19501949938783 | -1.41939690931732 |
| C | -1.48628579853499 | -0.04602717942246 | 0.98965459524158  |
| C | -0.77304515965135 | -0.09823980215901 | -0.26851726788466 |
| C | -3.55730987645337 | -0.02356803499506 | -0.32844381244003 |
| C | -0.75456577334612 | 0.03407663843711  | 2.20820630663475  |
| C | -2.91438713829924 | -0.12056848989511 | 0.97352036204126  |
| C | -2.72265716263229 | -0.12654075364261 | -1.47978922519032 |
| C | -3.57102564498899 | -0.30116631534586 | 2.22836204632291  |

|   |                   |                   |                   |
|---|-------------------|-------------------|-------------------|
| C | -4.93035573216235 | 0.22735888118573  | -0.55012840403686 |
| H | -5.59735509830951 | 0.42839654468946  | 0.28065397472124  |
| C | -1.46158920672397 | -0.02385637370201 | 3.40218876313604  |
| H | -0.94740918018589 | 0.02997693786894  | 4.36059392214792  |
| C | -4.64242345361410 | 0.07740090990100  | -2.95156177489275 |
| H | -5.07249916851313 | 0.10307172082472  | -3.95546409079659 |
| C | -3.29034686108872 | -0.10934908141728 | -2.77558018273199 |
| H | -2.59895754729655 | -0.21833079375401 | -3.61266145711807 |
| C | -5.45938549903806 | 0.27481115403859  | -1.82543712139774 |
| H | -6.52489481804360 | 0.47907117322871  | -1.95246877012848 |
| C | -2.83612750978257 | -0.22749873441859 | 3.40250813058909  |
| H | -3.34621135094461 | -0.36444145732767 | 4.35549852247454  |
| N | 6.83997145239167  | -0.00405852445983 | -1.92743827680142 |
| H | 7.20675709808364  | 0.17920461516269  | -2.85061099232150 |
| H | 7.40395166259393  | 0.35280917695044  | -1.16911853282222 |
| C | -5.02396501437971 | -0.68149057841897 | 2.41185307537468  |
| F | -5.23480231475331 | -1.20609607992676 | 3.62443064555494  |
| F | -5.85910738898569 | 0.37031423286427  | 2.32329193721425  |
| F | -5.42748063226478 | -1.59501781852772 | 1.52978825562074  |

2-amino-10<sup>1</sup>-nitro-pBiphe (**38**), S<sub>0,eq</sub> in vacuum

|   |                  |                   |                   |
|---|------------------|-------------------|-------------------|
| N | 1.31792180966563 | -0.11150089849272 | -1.43021216132841 |
| C | 1.41983942933184 | 0.05672231458343  | 0.97152377556755  |
| C | 0.71140773315422 | -0.05611587113225 | -0.27609588220717 |
| C | 3.50160333156286 | 0.05576031529752  | -0.34165838983453 |
| C | 0.72039525283678 | 0.10490777785532  | 2.20837015406722  |
| C | 2.83828525564210 | 0.11984209788487  | 0.94263346600003  |
| C | 2.66841415900278 | -0.06427108083834 | -1.48978267903725 |
| C | 3.53764044996152 | 0.24029470841188  | 2.15890589812717  |
| H | 4.62677512325519 | 0.29049239399152  | 2.15995756762535  |
| C | 4.89467159798028 | 0.10728424120413  | -0.50687926579773 |
| H | 5.54716913033411 | 0.19970335835738  | 0.36343425071194  |
| C | 1.45800719669420 | 0.22657267529025  | 3.38308269798840  |

|   |                   |                   |                   |
|---|-------------------|-------------------|-------------------|
| H | 0.95662899572818  | 0.27030073528860  | 4.34962381992222  |
| C | 4.63984537546431  | -0.08580158999423 | -2.90986705354146 |
| H | 5.09298365089028  | -0.14508428729878 | -3.90305496309277 |
| C | 3.27694366919233  | -0.13305369736318 | -2.76752641113649 |
| H | 2.61360527917755  | -0.22427409437308 | -3.62930198637441 |
| C | 5.48099861665153  | 0.03774920063107  | -1.77085659813167 |
| C | 2.85441075545479  | 0.29535145381922  | 3.35741204751085  |
| H | 3.40481731859546  | 0.39062602659634  | 4.29586551662154  |
| N | -1.37472880386628 | -0.18630123834562 | -1.41771432366133 |
| C | -1.46863438989712 | -0.06800952966699 | 0.99311767092342  |
| C | -0.76631360370412 | -0.10109254314606 | -0.27060269549123 |
| C | -3.55644738718413 | -0.07603988158299 | -0.31315743265255 |
| C | -0.74883539706121 | 0.02059721510369  | 2.21898268287005  |
| C | -2.88998336551917 | -0.15256554214536 | 0.96932250546465  |
| C | -2.73093333777933 | -0.14708021313339 | -1.47065420059638 |
| C | -3.53319053322819 | -0.26559784978631 | 2.22249380546477  |
| C | -4.94206405403690 | 0.12890692997064  | -0.49706787482305 |
| H | -5.60318277867547 | 0.29457320963934  | 0.35130178477955  |
| C | -1.46808688805755 | 0.02593744008757  | 3.41212863369136  |
| H | -0.95858368632333 | 0.11352444666004  | 4.37045494301228  |
| C | -4.68174640190790 | 0.01752746041188  | -2.90310274577481 |
| H | -5.13000356264949 | 0.04117138062076  | -3.89902400473144 |
| C | -3.32074179066009 | -0.12926489705041 | -2.75656376553341 |
| H | -2.64483656186553 | -0.20836014228671 | -3.60948687904960 |
| C | -5.49134516723320 | 0.17355343647066  | -1.76312966550345 |
| H | -6.56497955620348 | 0.33951208525721  | -1.87483382546759 |
| C | -2.85051974992136 | -0.13016830017923 | 3.41473317995654  |
| H | -3.40790576837277 | -0.18455711521677 | 4.35098878171062  |
| N | -4.93761817002637 | -0.65729162207189 | 2.35532452885207  |
| O | -5.63875620756893 | 0.02080663438755  | 3.07545228199747  |
| O | -5.28266216614734 | -1.66166109972666 | 1.77784088265635  |
| N | 6.84218390688073  | 0.04613334912375  | -1.92900810388939 |
| H | 7.21225130370085  | 0.25487117739456  | -2.84530754707641 |

H 7.41099998673173 0.36336942949176 -1.15696242078884

10-amino-2'-trifluoromethyl-pBiphe (**39**), S<sub>0,eq</sub> in vacuum

N 1.36152002413234 0.18937129988701 -1.35943355437902  
C 1.46606025949890 0.03749271623988 1.05185475309962  
C 0.76293113697445 0.08678089321974 -0.20942567829328  
C 3.54496690813778 0.06315412756356 -0.26116053813157  
C 0.73925356139290 -0.05166795311670 2.26864814027152  
C 2.88802600429666 0.11980072882605 1.02942769205840  
C 2.71665345147667 0.15175229228910 -1.41925253577145  
C 3.57405448125263 0.27841891098606 2.27446584964674  
C 4.93163586989047 -0.13737808890799 -0.47189260061601  
H 5.58584176020760 -0.34485210436178 0.37278304742374  
C 1.46650181928741 -0.01193743669816 3.45568759064306  
H 0.95792805870956 -0.07861592158332 4.41753315848536  
C 4.65535347114904 0.01879188920492 -2.87634358502391  
H 5.09360016000450 0.01562302225985 -3.87682524976102  
C 3.29510207772103 0.15875622743063 -2.70951054976410  
H 2.60889879185447 0.25148267322107 -3.55301796333380  
C 5.47028433671391 -0.15943297959482 -1.74592492460659  
H 6.54217446219905 -0.33187203742636 -1.86918122715594  
C 2.84181415318860 0.17073592444463 3.45806924602239  
H 3.36888888429158 0.26395762619324 4.41135539786213  
N -1.31625026807406 0.12830893440624 -1.37777256023423  
C -1.42828878643719 -0.09722160309836 1.02528831382132  
C -0.72074314709323 0.04673278065128 -0.22095657887720  
C -3.49624634975707 -0.07937668009947 -0.29454287129183  
C -0.72368255488325 -0.16512047173204 2.25886765224169  
C -2.84540760553109 -0.17415962348573 0.99202144659670  
C -2.67196855921719 0.07632720993214 -1.44075338570330  
C -3.54985618503920 -0.33752402608659 2.19968707456213  
H -4.63801582193908 -0.40241462271131 2.19855872186467  
C -4.89378428852639 -0.13016750983957 -0.46796293588720

|   |                   |                   |                   |
|---|-------------------|-------------------|-------------------|
| H | -5.55329337281997 | -0.24939092336789 | 0.39115616387713  |
| C | -1.46550734674830 | -0.33520372242195 | 3.42625243555384  |
| H | -0.96444906685909 | -0.40860608262270 | 4.39142944875699  |
| C | -4.63645090580074 | 0.12762725301168  | -2.86609677732957 |
| H | -5.09348010991410 | 0.20599571800997  | -3.85477367705122 |
| C | -3.27064485118799 | 0.17804353662472  | -2.72049352295462 |
| H | -2.60112078746875 | 0.29577393962856  | -3.57384174359897 |
| C | -5.45272848447637 | -0.02846999338727 | -1.72576128035525 |
| C | -2.86075149436349 | -0.42104332568841 | 3.39382115307384  |
| H | -3.40989755734567 | -0.55498363241505 | 4.32862075564138  |
| N | 4.92690352132223  | 0.52972066602251  | 2.34917555150526  |
| H | 5.32320599933792  | 1.07114412081183  | 1.59040825990682  |
| H | 5.24756701924593  | 0.83902086849932  | 3.25813180032359  |
| C | -6.94203724655452 | -0.07809448996566 | -1.91167704188711 |
| F | -7.40104527408736 | 1.04829760119220  | -2.47006126248259 |
| F | -7.59355627978023 | -0.24524709923888 | -0.75747734922614 |
| F | -7.29885986838132 | -1.08193063270619 | -2.72150425952241 |

10-amino-2'-nitro-pBiphe (**40**), S<sub>0,eq</sub> in vacuum

|   |                  |                   |                   |
|---|------------------|-------------------|-------------------|
| N | 1.35963301962579 | 0.16222677476190  | -1.36164676907790 |
| C | 1.46340116175067 | 0.04947033280024  | 1.05204529155319  |
| C | 0.76102686224691 | 0.07940968313576  | -0.20976749551204 |
| C | 3.54211737901848 | 0.04980606667503  | -0.26091729946678 |
| C | 0.73637388180486 | -0.01920218180127 | 2.26980120377248  |
| C | 2.88547116551368 | 0.12879644446724  | 1.02823419567938  |
| C | 2.71419526280399 | 0.12140142191697  | -1.42090223646847 |
| C | 3.57177334174872 | 0.30593361735215  | 2.27106298591831  |
| C | 4.92833150625739 | -0.15711036243432 | -0.46851135327458 |
| H | 5.58239123101179 | -0.35265745136826 | 0.37908687686938  |
| C | 1.46364128925811 | 0.03667632054309  | 3.45633113405558  |
| H | 0.95497016045790 | -0.01484058256591 | 4.41905044019700  |
| C | 4.65224643276356 | -0.03851840440966 | -2.87565320522751 |
| H | 5.09084795929528 | -0.05855576187651 | -3.87572455471339 |

|   |                   |                   |                   |
|---|-------------------|-------------------|-------------------|
| C | 3.29246578778740  | 0.10678059548909  | -2.71138729754950 |
| H | 2.60652926113377  | 0.18739630834258  | -3.55633626069952 |
| C | 5.46649944248905  | -0.20063297309509 | -1.74209866606004 |
| H | 6.53793854417873  | -0.37761113386689 | -1.86262955385604 |
| C | 2.83914307393657  | 0.21668762965153  | 3.45624243956465  |
| H | 3.36621440114397  | 0.32307521483325  | 4.40808338447520  |
| N | -1.31589103253132 | 0.10530459439287  | -1.38221344847644 |
| C | -1.43018714840413 | -0.08068880283065 | 1.02606453743109  |
| C | -0.72217329304915 | 0.04147722748982  | -0.22225629493355 |
| C | -3.49621743228663 | -0.08169938978710 | -0.29577853969996 |
| C | -0.72625357791172 | -0.12919590045454 | 2.26083675405863  |
| C | -2.84711171137150 | -0.15593710040110 | 0.99393991898452  |
| C | -2.67009863158962 | 0.05446915894072  | -1.44708211401454 |
| C | -3.55399935436526 | -0.29732020903139 | 2.20154163829013  |
| H | -4.64232419221247 | -0.36012639469968 | 2.19925974332392  |
| C | -4.88995491679785 | -0.13356006702406 | -0.46610815608706 |
| H | -5.57612367673020 | -0.23708531718509 | 0.37321251650885  |
| C | -1.47043917359298 | -0.27761316276726 | 3.43021572649448  |
| H | -0.97071513740546 | -0.33502893799179 | 4.39713216040449  |
| C | -4.63109870319513 | 0.08694483489174  | -2.88393909166824 |
| H | -5.11420955739625 | 0.14824579407348  | -3.85867443853268 |
| C | -3.26554732984505 | 0.13699131937211  | -2.73062310755648 |
| H | -2.59333698708512 | 0.24030297842635  | -3.58360963476257 |
| C | -5.42590107628392 | -0.04961842287246 | -1.73411382568159 |
| C | -2.86538596141200 | -0.36132505177541 | 3.39787609665352  |
| H | -3.41574896055905 | -0.47784942714976 | 4.33422531034732  |
| N | -6.88375977840970 | -0.10487432224809 | -1.88328743085879 |
| O | -7.33138743750727 | -0.02725897805457 | -3.00626675038927 |
| O | -7.54908506208707 | -0.22434503027121 | -0.87697177775598 |
| N | 4.92378898388910  | 0.55744330808689  | 2.34194200766317  |
| H | 5.32362865734623  | 1.08296953014317  | 1.57407391951346  |
| H | 5.24742132656694  | 0.87694621017605  | 3.24624102056411  |

5-*N*-oxide-pBiphe (**41**), S<sub>0,eq</sub> in vacuum

|   |                   |                   |                   |
|---|-------------------|-------------------|-------------------|
| N | 1.42043615712484  | -0.04434200034465 | -1.41650417049751 |
| C | 1.45376320455654  | 0.08724131824499  | 0.99125115841637  |
| C | 0.76956805868513  | 0.02476056691758  | -0.28690065097839 |
| C | 3.57158050180575  | 0.09090243275659  | -0.27115943927350 |
| C | 0.73791200157175  | 0.08455194359414  | 2.21556949558651  |
| C | 2.87394876134531  | 0.15091170900265  | 0.99406797689913  |
| C | 2.77753917199246  | -0.03047996893855 | -1.44030452426920 |
| C | 3.55048356043325  | 0.25773118481784  | 2.22266986316517  |
| H | 4.63885384216315  | 0.31361644898511  | 2.24216356087445  |
| C | 4.97416388684334  | 0.12951013173183  | -0.40716157518418 |
| H | 5.60770935646651  | 0.22721359671134  | 0.47575314188037  |
| C | 1.45241129295582  | 0.20362746652913  | 3.40791704849988  |
| H | 0.93030781934639  | 0.23269758625311  | 4.36358667913051  |
| C | 4.77865801606239  | -0.09157006728609 | -2.81043767449732 |
| H | 5.25715988549932  | -0.16284168671098 | -3.78997080674026 |
| C | 3.40484979463537  | -0.12406160401077 | -2.70528820740924 |
| H | 2.75296446943320  | -0.21567238944450 | -3.57565341876483 |
| C | 5.56752205536322  | 0.03937656990623  | -1.65217103035906 |
| H | 6.65635980198929  | 0.06923774583362  | -1.73585676616370 |
| C | 2.84451760951095  | 0.29427968284659  | 3.40942664195306  |
| H | 3.37694502797426  | 0.38840399890812  | 4.35850558461227  |
| N | -1.37678055560003 | 0.12634203535383  | -1.46304115382162 |
| C | -1.42520265994220 | -0.06108441699476 | 0.95527820792749  |
| C | -0.69915701651510 | 0.03220272974647  | -0.28458990574073 |
| C | -3.54141166474681 | -0.12862665845409 | -0.29603940675620 |
| C | -0.72175976253220 | -0.05355545754989 | 2.19530178727170  |
| C | -2.84275860497421 | -0.15706328751758 | 0.97049534425469  |
| C | -2.80121734688972 | 0.02579076652154  | -1.47786425335368 |
| C | -3.52601721096369 | -0.27050731866410 | 2.18952867352940  |
| H | -4.61305185390633 | -0.34594003993849 | 2.19882875503427  |
| C | -4.94275562687658 | -0.23489899175188 | -0.42093157563117 |
| H | -5.55513170402194 | -0.35943538600497 | 0.47195639639850  |



|   |                   |                   |                   |
|---|-------------------|-------------------|-------------------|
| C | -1.44619222307369 | -0.17907162595095 | 3.38115067928258  |
| H | -0.92168504002513 | -0.19804548610917 | 4.33561310920059  |
| C | -4.79531691741458 | -0.02363317347329 | -2.82164335060893 |
| H | -5.28277216013065 | 0.01657064571202  | -3.79800190068628 |
| C | -3.42141989676117 | 0.08220534924211  | -2.73402601884070 |
| H | -2.78239224908932 | 0.20652087628050  | -3.60658389060801 |
| C | -5.55971194524452 | -0.18446901074919 | -1.65606417864676 |
| H | -6.64658649564193 | -0.27010868826789 | -1.72156969127783 |
| C | -2.83393952156889 | -0.28937060509950 | 3.38580475591706  |
| H | -3.37056861342878 | -0.38707017564382 | 4.33149861197276  |
| O | -0.83054045641074 | 0.29441604800976  | -2.56287551669765 |

2-dimethylamino-5'-*N*-oxide-pBiphe (**42**),  $S_{0,eq}$  in vacuum

|   |                  |                   |                   |
|---|------------------|-------------------|-------------------|
| N | 1.34362038396767 | -0.12430367304778 | -1.51420368588713 |
| C | 1.43679597308842 | 0.21602064513614  | 0.86821131415226  |
| C | 0.71657713184541 | 0.02946596417590  | -0.37694114185271 |
| C | 3.52523746810835 | 0.14364545550846  | -0.44794823937954 |
| C | 0.75580222083288 | 0.31071876231125  | 2.10930649419816  |
| C | 2.85626377626255 | 0.30017036940971  | 0.82708935852766  |
| C | 2.69354911249763 | -0.08712246980098 | -1.57319793052174 |
| C | 3.56213363751505 | 0.52173865751111  | 2.02315737151932  |
| H | 4.64973935885592 | 0.59431877754913  | 2.00770829851429  |
| C | 4.91767859770580 | 0.19661122186700  | -0.61290964040222 |
| H | 5.54552990622524 | 0.37835937397545  | 0.25605805717946  |
| C | 1.49957084395056 | 0.54257710842703  | 3.26676969124927  |
| H | 1.00228261838388 | 0.64724219728370  | 4.23039319592412  |
| C | 4.66869785261324 | -0.22501326655671 | -2.98670656211186 |
| H | 5.09658370318320 | -0.37186671516310 | -3.97775451151261 |
| C | 3.30532370880871 | -0.27121958523659 | -2.83581125658533 |
| H | 2.64377401771405 | -0.44748051886163 | -3.68583831086033 |
| C | 5.51826484866291 | 0.01674920662359  | -1.86725078353510 |
| C | 2.88949840661367 | 0.65149155378895  | 3.22265036583165  |
| H | 3.44576610055600 | 0.83452215871540  | 4.14474490722102  |

|   |                   |                   |                   |
|---|-------------------|-------------------|-------------------|
| N | -1.46272365224539 | -0.02190409507677 | -1.49445880895687 |
| C | -1.43951583499115 | 0.01975834376867  | 0.93025569983619  |
| C | -0.74968433639096 | 0.00758825567615  | -0.33391076508416 |
| C | -3.58913000632505 | -0.19593633855740 | -0.24563084050496 |
| C | -0.70187812086355 | 0.15243775722255  | 2.14359582132990  |
| C | -2.85470643985385 | -0.09446290452897 | 0.99663385185136  |
| C | -2.88352539744575 | -0.14424176722322 | -1.45743862436304 |
| C | -3.50169729692443 | -0.10199147049023 | 2.24045944964203  |
| H | -4.58674629356971 | -0.19104664945908 | 2.28830960613491  |
| C | -4.99131364119551 | -0.33370566428611 | -0.31886280410498 |
| H | -5.57634053592670 | -0.38143210615572 | 0.59950662349465  |
| C | -1.39129166766511 | 0.12885521919789  | 3.35668297549917  |
| H | -0.84028651539894 | 0.20674521092280  | 4.29304066150091  |
| C | -4.91409943104300 | -0.35026001752975 | -2.73156793849556 |
| H | -5.42876739545762 | -0.41035740117382 | -3.69293879656227 |
| C | -3.54021796190585 | -0.21699458852997 | -2.69435528041367 |
| H | -2.92622471220514 | -0.16715158479809 | -3.59200414140090 |
| C | -5.64365630092259 | -0.41014263783570 | -1.53447585383572 |
| H | -6.73035531832250 | -0.51736732325448 | -1.55962753082071 |
| C | -2.77636289557946 | 0.00118159561052  | 3.41244387450225  |
| H | -3.28468997441922 | -0.01412237388960 | 4.37858187460659  |
| O | -0.94931343459557 | 0.04729733922787  | -2.62335449374074 |
| N | 6.88147456984079  | 0.06939091203618  | -2.02294749139260 |
| C | 7.47413119175317  | -0.12941440671501 | -3.31946104832649 |
| H | 7.14028426773070  | 0.62647988025518  | -4.05271791850172 |
| H | 8.56455050769509  | -0.04856453038488 | -3.23411986802251 |
| H | 7.24482338176218  | -1.12619312345734 | -3.73764877723847 |
| C | 7.72027500757574  | 0.30843557223630  | -0.88028264687063 |
| H | 7.60915681536493  | -0.47691715431533 | -0.10993495267620 |
| H | 8.77084552673564  | 0.32251405913223  | -1.19452382449447 |
| H | 7.49969622739754  | 1.27909676875914  | -0.39967502425984 |

2-dimethylamino-5'-*N*-oxide-*p*Biphe (**42**),  $S_{0,eq}$  in chloroform

|   |                   |                   |                   |
|---|-------------------|-------------------|-------------------|
| N | 1.33782213237584  | 0.06783327056011  | -1.52345732373224 |
| C | 1.44070082427218  | 0.10456874379875  | 0.88219614658159  |
| C | 0.71418994033849  | 0.04093780773406  | -0.37126244608974 |
| C | 3.52837865798717  | 0.12759922344161  | -0.44102638252747 |
| C | 0.76288942503703  | 0.16143292498752  | 2.12826267929704  |
| C | 2.86340270916344  | 0.11607943537075  | 0.84697832378245  |
| C | 2.68766015046426  | 0.12592217618041  | -1.58523987530306 |
| C | 3.57916144053515  | 0.13020784591462  | 2.05822843435065  |
| H | 4.66952019265703  | 0.13203793792302  | 2.04756699179510  |
| C | 4.92120167100246  | 0.15571987479943  | -0.59921293808909 |
| H | 5.55388649495702  | 0.15352354876432  | 0.28538515971409  |
| C | 1.51540085018265  | 0.16393442403045  | 3.30374867632232  |
| H | 1.02324983710051  | 0.18241789179091  | 4.27572885045438  |
| C | 4.65956362911596  | 0.20391249195320  | -3.01250202371261 |
| H | 5.08248119558775  | 0.23749460761068  | -4.01621878954474 |
| C | 3.29565879547081  | 0.16821674168171  | -2.86401357788474 |
| H | 2.63727525175711  | 0.16953090547254  | -3.73564439441126 |
| C | 5.51944176740307  | 0.19300873670843  | -1.87135668710119 |
| C | 2.91043837845761  | 0.14150378948970  | 3.26756855985953  |
| H | 3.47354880723659  | 0.14198104133662  | 4.20377432225427  |
| N | -1.46364275551224 | -0.26596725963708 | -1.45704267119172 |
| C | -1.44247960956603 | 0.12326907428677  | 0.93353015590181  |
| C | -0.75139006203038 | -0.03725987107090 | -0.32166113963575 |
| C | -3.59723908059473 | 0.01917086036204  | -0.24958762983772 |
| C | -0.70218266399834 | 0.23301343981664  | 2.14715849897642  |
| C | -2.86215778559779 | 0.16400001201663  | 0.98811880021120  |
| C | -2.88594799600628 | -0.21093532659068 | -1.43828574198304 |
| C | -3.51444092373138 | 0.33253941152191  | 2.21899868666186  |
| H | -4.60327148039456 | 0.36158216107552  | 2.26017118388810  |
| C | -5.00448193852123 | 0.08114258295602  | -0.33511919358703 |
| H | -5.59188755065628 | 0.26529408715849  | 0.56455736776692  |
| C | -1.39516247337254 | 0.40798082433724  | 3.34660953616741  |
| H | -0.84596937442477 | 0.51072286780261  | 4.28190727978896  |

|   |                   |                   |                   |
|---|-------------------|-------------------|-------------------|
| C | -4.92440118305739 | -0.32367136504015 | -2.71463161053449 |
| H | -5.43974835982238 | -0.45592797671569 | -3.66871380596081 |
| C | -3.54536408900764 | -0.38728477101181 | -2.66422563200874 |
| H | -2.93847823917266 | -0.56614533171454 | -3.55008369619985 |
| C | -5.65779973652823 | -0.08571476779137 | -1.54180495092765 |
| H | -6.74826991589132 | -0.03154693094831 | -1.57870111124348 |
| C | -2.78638378487833 | 0.46009455032831  | 3.38751656557007  |
| H | -3.29815278231976 | 0.59757208884846  | 4.34245163138955  |
| O | -0.94017103838406 | -0.52334382389532 | -2.56159454944409 |
| N | 6.87659412482867  | 0.22051784495283  | -2.02113897513386 |
| C | 7.46701709971539  | 0.28632978999549  | -3.33582844077245 |
| H | 7.17575363754315  | 1.20202457560237  | -3.88054963621920 |
| H | 8.55921470374660  | 0.28827312851436  | -3.23947688776516 |
| H | 7.18838032690802  | -0.58054069315076 | -3.95977135864442 |
| C | 7.72553476347644  | 0.23182430276090  | -0.85693116341837 |
| H | 7.57124089998300  | -0.66124332027942 | -0.22582606701760 |
| H | 8.77540113890726  | 0.24132912355706  | -1.17239615212113 |
| H | 7.55313787425761  | 1.12166990640355  | -0.22467782869101 |

2-dimethylamino-5'-*N*-oxide-pBiphe (**42**),  $S_{0,eq}$  in methanol

|   |                  |                  |                   |
|---|------------------|------------------|-------------------|
| N | 1.34061757108956 | 0.07454693960870 | -1.52390566700397 |
| C | 1.44054313986179 | 0.10045825297769 | 0.88047699144493  |
| C | 0.71424104256731 | 0.03995200023571 | -0.37172941912102 |
| C | 3.53008800281820 | 0.12842691033908 | -0.44101160715621 |
| C | 0.76349399393982 | 0.15717298015140 | 2.12663133248780  |
| C | 2.86331805141599 | 0.11109995265543 | 0.84593976569438  |
| C | 2.68952371329007 | 0.13406387757338 | -1.58652203253228 |
| C | 3.57937314431655 | 0.12032865192100 | 2.05700796804439  |
| H | 4.66993587169159 | 0.12083551097092 | 2.04747832631307  |
| C | 4.92182373680638 | 0.15531733158433 | -0.59721059227305 |
| H | 5.55424128835349 | 0.14648789243118 | 0.28768418740010  |
| C | 1.51507335703538 | 0.15564480476199 | 3.30230286888777  |
| H | 1.02343045412847 | 0.17472713875207 | 4.27472682763829  |

|   |                   |                   |                   |
|---|-------------------|-------------------|-------------------|
| C | 4.66168991240320  | 0.21773751804809  | -3.01304852219733 |
| H | 5.08518028485833  | 0.25631483490462  | -4.01649062323282 |
| C | 3.29847701756220  | 0.18301205260263  | -2.86542066187928 |
| H | 2.64381981325553  | 0.19023055820873  | -3.74019962868668 |
| C | 5.52136829561429  | 0.19946598308796  | -1.87030843806048 |
| C | 2.91029235792813  | 0.12938546244129  | 3.26620903244521  |
| H | 3.47325787941896  | 0.12634380823250  | 4.20258585100334  |
| N | -1.46762482504710 | -0.27460480397419 | -1.45297320494377 |
| C | -1.44159337240302 | 0.12556219169506  | 0.93161930679643  |
| C | -0.75221181391068 | -0.04075902022080 | -0.32502157516464 |
| C | -3.59660531408402 | 0.02132700477691  | -0.25124517277755 |
| C | -0.70076605902883 | 0.23510377475847  | 2.14454826198952  |
| C | -2.86071864837072 | 0.17044640623794  | 0.98470658851868  |
| C | -2.88585815472454 | -0.21987293875195 | -1.43892891402332 |
| C | -3.51332131196011 | 0.34535347322119  | 2.21501400878156  |
| H | -4.60205674348478 | 0.37785537166440  | 2.25791311073566  |
| C | -5.00367145780935 | 0.08788383035001  | -0.33313583292915 |
| H | -5.58868508871672 | 0.28162763064368  | 0.56609439793322  |
| C | -1.39279760488408 | 0.41565760102719  | 3.34335479084655  |
| H | -0.84481326206088 | 0.51776707610047  | 4.27957659304972  |
| C | -4.92921225443444 | -0.33694333503228 | -2.70856764524359 |
| H | -5.44699376003541 | -0.47598886488841 | -3.66055417956279 |
| C | -3.55029452252186 | -0.40436587331331 | -2.66210689413918 |
| H | -2.95606307910217 | -0.59187432102725 | -3.55426918629303 |
| C | -5.66000603767916 | -0.08658074036126 | -1.53679476254940 |
| H | -6.75042992079526 | -0.02904803050494 | -1.57247712148553 |
| C | -2.78405289206287 | 0.47363267413976  | 3.38231901612548  |
| H | -3.29549138323729 | 0.61571920173413  | 4.33694652722326  |
| O | -0.94038234414462 | -0.54186521835622 | -2.56638957678430 |
| N | 6.87498429739926  | 0.22636315424340  | -2.01886559987856 |
| C | 7.46821207389443  | 0.29167752439375  | -3.33419371419567 |
| H | 7.17655253774759  | 1.20728546530479  | -3.87791974936445 |
| H | 8.56001714205279  | 0.29488731422458  | -3.23534248392957 |

|   |                  |                   |                   |
|---|------------------|-------------------|-------------------|
| H | 7.19086542678100 | -0.57615269250022 | -3.95690619093941 |
| C | 7.72522723557568 | 0.22663372615205  | -0.85337040007539 |
| H | 7.57141367851918 | -0.67292443538777 | -0.23201640300615 |
| H | 8.77462893364345 | 0.24077386832625  | -1.16953706887076 |
| H | 7.55108349352917 | 1.11050313783585  | -0.21419771506005 |

2-dimethylamino-5'-*N*-oxide-pBiphe (**42**), S<sub>0,eq</sub> in dimethyl sulfoxide

|   |                   |                   |                   |
|---|-------------------|-------------------|-------------------|
| N | 1.33740770203314  | 0.07301157927693  | -1.52614285444437 |
| C | 1.44026728027076  | 0.10360292632752  | 0.88000516287408  |
| C | 0.71327665748589  | 0.04227695518495  | -0.37348768290155 |
| C | 3.52883764525192  | 0.12798124364472  | -0.44262582412270 |
| C | 0.76300678342069  | 0.16059388316680  | 2.12645691848199  |
| C | 2.86300397413468  | 0.11406561245552  | 0.84529475819283  |
| C | 2.68748061808264  | 0.13091061710725  | -1.58725483497395 |
| C | 3.57953740476865  | 0.12606797700039  | 2.05599663144763  |
| H | 4.67004599160124  | 0.12697209004683  | 2.04590812218456  |
| C | 4.92130726200698  | 0.15494944782393  | -0.59862963633555 |
| H | 5.55334968293574  | 0.14873313784278  | 0.28663660251561  |
| C | 1.51547095220898  | 0.16185070114903  | 3.30207042625841  |
| H | 1.02394957364776  | 0.18175593807514  | 4.27447499141525  |
| C | 4.66172619362769  | 0.21213222676228  | -3.01335614972368 |
| H | 5.08542793917161  | 0.24905425860574  | -4.01676636197640 |
| C | 3.29781703160610  | 0.17732687864138  | -2.86537001372672 |
| H | 2.64324344014088  | 0.18298015264116  | -3.74018310545830 |
| C | 5.52156726745106  | 0.19640070982325  | -1.87116623655175 |
| C | 2.91050141588755  | 0.13728154013891  | 3.26545512039425  |
| H | 3.47371646553409  | 0.13665119009893  | 4.20160355325773  |
| N | -1.46460945696118 | -0.26958171132504 | -1.45753789111496 |
| C | -1.44222142366031 | 0.12492987429808  | 0.93246344843774  |
| C | -0.75195079869369 | -0.03731584524087 | -0.32315935099250 |
| C | -3.59726608276519 | 0.02025197356640  | -0.24971377702733 |
| C | -0.70175794275285 | 0.23450126605935  | 2.14582021425359  |
| C | -2.86169982424638 | 0.16708181780648  | 0.98740517955287  |

|   |                   |                   |                   |
|---|-------------------|-------------------|-------------------|
| C | -2.88663403679193 | -0.21470867236154 | -1.43808246785220 |
| C | -3.51401735365648 | 0.33768012181923  | 2.21805047808927  |
| H | -4.60290476278078 | 0.36795402841120  | 2.26045700032363  |
| C | -5.00450234225525 | 0.08385131655392  | -0.33346405964200 |
| H | -5.59111018403402 | 0.27226389876056  | 0.56589800164992  |
| C | -1.39382283207436 | 0.41087853840179  | 3.34566668985505  |
| H | -0.84502579213731 | 0.51242298947802  | 4.28148299924511  |
| C | -4.92685261789862 | -0.33092784439829 | -2.71163150387959 |
| H | -5.44392458146561 | -0.46723836834527 | -3.66430452008962 |
| C | -3.54771405285723 | -0.39563528403813 | -2.66268796880780 |
| H | -2.94389401359603 | -0.57909471504768 | -3.54958861811428 |
| C | -5.65883306731631 | -0.08702064108190 | -1.53910901141256 |
| H | -6.74928213915960 | -0.03175351960670 | -1.57552075962496 |
| C | -2.78507999631466 | 0.46516914109222  | 3.38619782069395  |
| H | -3.29647677436293 | 0.60394174633075  | 4.34117525059255  |
| O | -0.94051796508547 | -0.53056650466090 | -2.56206406907962 |
| N | 6.87584006272857  | 0.22357233383856  | -2.01941630142338 |
| C | 7.46854697362235  | 0.28786566629102  | -3.33403544938524 |
| H | 7.17665611251330  | 1.20302429100157  | -3.87868295625341 |
| H | 8.56029554161104  | 0.29003290020331  | -3.23491791191756 |
| H | 7.18926523256131  | -0.57952267081966 | -3.95664375920234 |
| C | 7.72477293530899  | 0.22727499523417  | -0.85403721415331 |
| H | 7.56848352081982  | -0.66945289252795 | -0.22907454021262 |
| H | 8.77423871647613  | 0.23905158566405  | -1.16994811156890 |
| H | 7.55018156095656  | 1.11310373282980  | -0.21744125774687 |

2-dimethylamino-5'-N-oxide-pBiphe (**42**),  $S_{0,eq}$  in water

|   |                  |                  |                   |
|---|------------------|------------------|-------------------|
| N | 1.33331101456997 | 0.06860631838284 | -1.52896035962407 |
| C | 1.43954309204550 | 0.05906093816602 | 0.87617816109025  |
| C | 0.71188659337347 | 0.01096996010236 | -0.37429132609396 |
| C | 3.52520026021017 | 0.07481680376678 | -0.44759876014223 |
| C | 0.76408600854099 | 0.12721692603837 | 2.12256331318312  |
| C | 2.86153484348758 | 0.05228408964933 | 0.84035607642989  |

|   |                   |                   |                   |
|---|-------------------|-------------------|-------------------|
| C | 2.68377332844003  | 0.11909217019972  | -1.59181006345325 |
| C | 3.57868208296681  | 0.04571333502613  | 2.05092197266482  |
| H | 4.66891619774119  | 0.03236627042697  | 2.03957381778302  |
| C | 4.91702444424450  | 0.07185000378851  | -0.60416118617100 |
| H | 5.54891857041550  | 0.02529616544907  | 0.27987797911122  |
| C | 1.51552250001290  | 0.11136390428103  | 3.29777398746033  |
| H | 1.02312669814419  | 0.13911242896527  | 4.26947862550604  |
| C | 4.65768130492580  | 0.19308208769294  | -3.01679547840028 |
| H | 5.08223511230488  | 0.23918432671919  | -4.01922823535824 |
| C | 3.29408599463324  | 0.18409400367733  | -2.86919314226188 |
| H | 2.64218071793754  | 0.21840523874078  | -3.74475819728792 |
| C | 5.51686160643577  | 0.13555277592741  | -1.87560028765452 |
| C | 2.91037871759538  | 0.06065679094833  | 3.26055131676660  |
| H | 3.47362575699329  | 0.04600318981272  | 4.19613859746491  |
| N | -1.46925154311264 | -0.35313409899835 | -1.44040225590062 |
| C | -1.44034437491373 | 0.12075695105536  | 0.92921858274096  |
| C | -0.75317494065508 | -0.07689034975142 | -0.32311343990376 |
| C | -3.59408341265287 | 0.01742279575047  | -0.25270369725645 |
| C | -0.69787934114249 | 0.23615600587734  | 2.14004467981603  |
| C | -2.85816783899055 | 0.18557285523756  | 0.98047609573148  |
| C | -2.88640236833234 | -0.27557625184872 | -1.43064374625387 |
| C | -3.50812754835654 | 0.39381642447257  | 2.20700091433013  |
| H | -4.59613726508740 | 0.44273999394199  | 2.24820179572472  |
| C | -4.99916437260920 | 0.10977592573069  | -0.33932908176457 |
| H | -5.58001332697513 | 0.34498889089599  | 0.55246861308423  |
| C | -1.38629478444464 | 0.44807161177300  | 3.33544321729405  |
| H | -0.83537829749908 | 0.55411440168834  | 4.26935714651724  |
| C | -4.92985330005482 | -0.39506032434614 | -2.69923390590240 |
| H | -5.44880272715681 | -0.55469205178286 | -3.64684401193582 |
| C | -3.55255796994688 | -0.48849713760093 | -2.64786514792150 |
| H | -2.96087149965295 | -0.71659223153341 | -3.53185185332707 |
| C | -5.65712270383126 | -0.09085825405879 | -1.53802458388698 |
| H | -6.74562014487743 | -0.01203732188422 | -1.57814083543110 |



|   |                   |                   |                   |
|---|-------------------|-------------------|-------------------|
| C | -2.77663812070255 | 0.53158162523697  | 3.37203997738289  |
| H | -3.28571739894270 | 0.69892119614070  | 4.32334384716373  |
| O | -0.94267193430517 | -0.67998417861615 | -2.54031950877468 |
| N | 6.87177786734626  | 0.14298083887674  | -2.02433207310133 |
| C | 7.46399034734742  | 0.10969891744504  | -3.34244963386225 |
| H | 7.15544166212778  | 0.97458471198610  | -3.95153332314129 |
| H | 8.55491096612740  | 0.14629465486849  | -3.24480787786946 |
| H | 7.20259030246448  | -0.80852543132211 | -3.89734336166930 |
| C | 7.72000662916078  | -0.00463942722203 | -0.86543539710943 |
| H | 7.55661436510976  | -0.96749655604516 | -0.34909413006789 |
| H | 8.76932930808585  | 0.04023412362734  | -1.17757492415137 |
| H | 7.55278818245380  | 0.80220089364449  | -0.13291682256717 |

2,2'-N-oxide-pBiphe (**43**),  $S_{0,eq}$  in vacuum

|   |                  |                  |                   |
|---|------------------|------------------|-------------------|
| N | 1.34707618705760 | 0.03369486535943 | -1.41819188643970 |
| C | 1.44038174439181 | 0.03777083484792 | 0.99821549721912  |
| C | 0.73733715109630 | 0.01883502113254 | -0.26160236958147 |
| C | 3.51865925245641 | 0.09141457453006 | -0.30288695531913 |
| C | 0.73582244912508 | 0.01969764028634 | 2.23401007924869  |
| C | 2.85971358259823 | 0.07514315507490 | 0.98407385461927  |
| C | 2.69501514208243 | 0.06869770573744 | -1.45955996968935 |
| C | 3.56157140513934 | 0.09455551693350 | 2.20303197390561  |
| H | 4.65150644673283 | 0.12326525889178 | 2.20950414329027  |
| C | 4.90620595038037 | 0.12771248343868 | -0.45675978720768 |
| H | 5.62348354626520 | 0.14742394194797 | 0.36135968766953  |
| C | 1.47395599307722 | 0.04026158114816 | 3.41457451922137  |
| H | 0.96833472789258 | 0.02774469029221 | 4.37989788629633  |
| C | 4.70184316614276 | 0.11980969928369 | -2.80886132038330 |
| H | 5.27537827493421 | 0.13383367319880 | -3.73464750443899 |
| C | 3.34215590206596 | 0.08427546660299 | -2.71972408131217 |
| H | 2.72670548329286 | 0.06719195994778 | -3.62002399556908 |
| C | 2.87165686686523 | 0.07732676758466 | 3.39913829840137  |
| H | 3.41901880651860 | 0.09261430226607 | 4.34395229080791  |

|   |                   |                   |                   |
|---|-------------------|-------------------|-------------------|
| N | -1.34716909910946 | -0.03380235420369 | -1.41809059088630 |
| C | -1.44029338650702 | -0.03784668646752 | 0.99832405616016  |
| C | -0.73734326851639 | -0.01892740501026 | -0.26154695410399 |
| C | -3.51866841726813 | -0.09150685308538 | -0.30262202732098 |
| C | -0.73564153044011 | -0.01975773832459 | 2.23406546921756  |
| C | -2.85962637286586 | -0.07521907515602 | 0.98428920324489  |
| C | -2.69511109485024 | -0.06880534326888 | -1.45935715837938 |
| C | -3.56139270790045 | -0.09461575930958 | 2.20330021518249  |
| H | -4.65132721377922 | -0.12332531160674 | 2.20985446309826  |
| C | -4.90622669779448 | -0.12780607486940 | -0.45639004018431 |
| H | -5.62344270657817 | -0.14750639833895 | 0.36178374052810  |
| C | -1.47368641974644 | -0.04030662864542 | 3.41468568546383  |
| H | -0.96799295380485 | -0.02777746067340 | 4.37997097676261  |
| C | -4.70204073543265 | -0.11993402474720 | -2.80850692047287 |
| H | -5.27564587616797 | -0.13396969305886 | -3.73424958263344 |
| C | -3.34234673733802 | -0.08439919473985 | -2.71947231236433 |
| H | -2.72696408191223 | -0.06732755088170 | -3.61981869116392 |
| C | -2.87138843306592 | -0.07737189609074 | 3.39935461902149  |
| H | -3.41868035456821 | -0.09264742795868 | 4.34420932227117  |
| O | 6.74418836731852  | 0.17472280778806  | -1.79634264706711 |
| O | -6.74430985239051 | -0.17483278092824 | -1.79583393969518 |
| N | -5.50130609271012 | -0.14219778121617 | -1.67564624488925 |
| N | 5.50119358731291  | 0.14208849228828  | -1.67606100252810 |

2,2'-*N*-oxide-pBiphe (**43**),  $S_{0,eq}$  in chloroform

|   |                  |                  |                   |
|---|------------------|------------------|-------------------|
| N | 1.34670522121266 | 0.02773684202960 | -1.41794554754216 |
| C | 1.44044002059455 | 0.04245471621068 | 0.99888541252824  |
| C | 0.73792932054904 | 0.01766202868371 | -0.25966416384715 |
| C | 3.51720646518521 | 0.09174073600900 | -0.30415055184479 |
| C | 0.73567305773993 | 0.02740568412804 | 2.23485117909714  |
| C | 2.85994630385776 | 0.08533342033250 | 0.98381383464978  |
| C | 2.69697407726853 | 0.06070646748969 | -1.46229113707824 |
| C | 3.56343799647362 | 0.11953649797027 | 2.20180893499134  |

|   |                   |                   |                   |
|---|-------------------|-------------------|-------------------|
| H | 4.65341714526566  | 0.15353570827881  | 2.20799721503582  |
| C | 4.90557621440987  | 0.12500659988460  | -0.45629280518306 |
| H | 5.61448936827101  | 0.14961938511782  | 0.36961978364779  |
| C | 1.47358578237105  | 0.06681579550265  | 3.41557689965736  |
| H | 0.96964889711807  | 0.06434201850698  | 4.38205691156848  |
| C | 4.70461616448440  | 0.09807866419402  | -2.80724327921811 |
| H | 5.27215141897870  | 0.10315649369860  | -3.73735763982545 |
| C | 3.34390675517066  | 0.06546632356270  | -2.72159586073011 |
| H | 2.73868316012212  | 0.04201716917807  | -3.62919240874885 |
| C | 2.87175813636033  | 0.11241860302327  | 3.39763500781608  |
| H | 3.41872589928232  | 0.14221779374483  | 4.34260069048986  |
| N | -1.34679881698802 | -0.02784538143358 | -1.41784311458891 |
| C | -1.44035194958743 | -0.04253117438346 | 0.99899470875321  |
| C | -0.73793570721318 | -0.01775552250227 | -0.25960795694263 |
| C | -3.51721639124447 | -0.09183259006004 | -0.30388480906302 |
| C | -0.73549205915001 | -0.02746669593386 | 2.23490723289932  |
| C | -2.85985944732625 | -0.08540911966199 | 0.98403015945749  |
| C | -2.69707082748295 | -0.06081468522106 | -1.46208720095083 |
| C | -3.56325964285741 | -0.11959610838535 | 2.20207856252210  |
| H | -4.65323830411259 | -0.15359399516355 | 2.20834949415219  |
| C | -4.90559751849006 | -0.12509904256995 | -0.45592312859802 |
| H | -5.61444995451870 | -0.14970022950915 | 0.37004182140936  |
| C | -1.47331602117376 | -0.06686170089102 | 3.41568905030720  |
| H | -0.96930688262772 | -0.06437629256511 | 4.38213150714994  |
| C | -4.70481294596823 | -0.09820312036520 | -2.80688915624450 |
| H | -5.27241749021860 | -0.10329292481491 | -3.73696115410071 |
| C | -3.34409719990972 | -0.06559094593481 | -2.72134365729042 |
| H | -2.73894068303330 | -0.04215465639388 | -3.62898525625826 |
| C | -2.87148980266289 | -0.11246378553669 | 3.39785258016877  |
| H | -3.41838669410846 | -0.14225080760130 | 4.34285971420611  |
| O | 6.74795277076953  | 0.15774136576887  | -1.79227046327264 |
| O | -6.74807376653033 | -0.15784864973318 | -1.79176287031929 |
| N | -5.49668422705309 | -0.12832935915331 | -1.67333741837803 |

N 5.49657215677215 0.12822147449896 -1.67375112048242

2,2'-N-oxide-pBiphe (**43**), S<sub>0,eq</sub> in methanol

N 1.34564137098788 0.01943594735123 -1.41951883433197  
C 1.43986685719670 0.04675328887418 0.99811607208243  
C 0.73873503936383 0.01608213132031 -0.25998969659863  
C 3.51419098991074 0.09282270508412 -0.30443892004803  
C 0.73505369966903 0.03348550799243 2.23364783914308  
C 2.85900808058032 0.09504359571793 0.98333727251415  
C 2.69759017013705 0.05157222964672 -1.46364399364923  
C 3.56302497840417 0.14177022879457 2.20030032034308  
H 4.65290471314572 0.18162139674350 2.20751656630572  
C 4.90316395192985 0.12529203678540 -0.45547966541490  
H 5.60933710431893 0.15637532273452 0.37319611093931  
C 1.47206620103810 0.08634434910096 3.41410788007934  
H 0.96863173863903 0.08864753726523 4.38101574194113  
C 4.70613251628546 0.07769524114158 -2.80420762622467  
H 5.27242317094785 0.07464005338556 -3.73543242874283  
C 3.34467902128716 0.04554278970648 -2.72166725220275  
H 2.74518898646312 0.01411219893547 -3.63286344519984  
C 2.87014877320147 0.14055004448458 3.39540437963849  
H 3.41651702362592 0.18139248062749 4.34043023407479  
N -1.34573526471895 -0.01954581016386 -1.41941636877253  
C -1.43977884984551 -0.04682978874236 0.99822543208723  
C -0.73874152886794 -0.01617600833616 -0.25993335606582  
C -3.51420104619628 -0.09291424612100 -0.30417332081389  
C -0.73487274553860 -0.03354640916423 2.23370390468512  
C -2.85892129573482 -0.09511926733902 0.98355371214167  
C -2.69768715740697 -0.05168145180686 -1.46344009337353  
C -3.56284669856119 -0.14183037774582 2.20057025551044  
H -4.65272578980490 -0.18168103529377 2.20786943003418  
C -4.90318529169998 -0.12538262787162 -0.45511023859196  
H -5.60929767442922 -0.15645244532569 0.37361766683885

|   |                   |                   |                   |
|---|-------------------|-------------------|-------------------|
| C | -1.47179646849293 | -0.08639032153253 | 3.41422007826498  |
| H | -0.96828958351550 | -0.08868189344038 | 4.38109033578874  |
| C | -4.70632913866390 | -0.07782002326031 | -2.80385377517666 |
| H | -5.27268901945607 | -0.07477695608178 | -3.73503654029415 |
| C | -3.34486947547321 | -0.04566896702161 | -2.72141530107263 |
| H | -2.74544651698526 | -0.01425252053301 | -3.63265611091054 |
| C | -2.86988048289037 | -0.14059581940528 | 3.39562220217884  |
| H | -3.41617783375461 | -0.18142663720020 | 4.34068955615082  |
| O | 6.75235202598986  | 0.14641031323362  | -1.78656295474269 |
| O | -6.75247279682404 | -0.14651363070916 | -1.78605523198030 |
| N | -5.48906909569656 | -0.11786018500444 | -1.66976347159846 |
| N | 5.48895734143458  | 0.11775402317321  | -1.67017636493641 |

2,2'-N-oxide-pBiphe (**43**), S<sub>0,eq</sub> in dimethyl sulfoxide

|   |                  |                  |                   |
|---|------------------|------------------|-------------------|
| N | 1.34708843046212 | 0.02240936059959 | -1.41887646078202 |
| C | 1.44019551943182 | 0.04520369462139 | 0.99811823837336  |
| C | 0.73798993999521 | 0.01657655891492 | -0.25992633023923 |
| C | 3.51710842853591 | 0.09215060925903 | -0.30442211297213 |
| C | 0.73529986717687 | 0.03156557712383 | 2.23390458084873  |
| C | 2.85959277039263 | 0.09154828779076 | 0.98319625415017  |
| C | 2.69790896823881 | 0.05467618313524 | -1.46305889022499 |
| C | 3.56297574921169 | 0.13426726136839 | 2.20078778844011  |
| H | 4.65292484987845 | 0.17198256296056 | 2.20735298871705  |
| C | 4.90560329188767 | 0.12475145905057 | -0.45471665611732 |
| H | 5.61090850438655 | 0.15332465405234 | 0.37436320557021  |
| C | 1.47237766492813 | 0.08048435446358 | 3.41477106641724  |
| H | 0.96846345896484 | 0.08179585913527 | 4.38138752544147  |
| C | 4.70680067576805 | 0.08471106883224 | -2.80564240009204 |
| H | 5.27306930473510 | 0.08483255890590 | -3.73659744210811 |
| C | 3.34607774533197 | 0.05254143619483 | -2.72152142850902 |
| H | 2.74472972149244 | 0.02411294825668 | -3.63173652792345 |
| C | 2.87046378029687 | 0.13167139525096 | 3.39628846668998  |
| H | 3.41696875661628 | 0.16920451658048 | 4.34126405464752  |

|   |                   |                   |                   |
|---|-------------------|-------------------|-------------------|
| N | -1.34718242749507 | -0.02251510094843 | -1.41877361146838 |
| C | -1.44010766792997 | -0.04527848633273 | 0.99822773607395  |
| C | -0.73799651758609 | -0.01666732646568 | -0.25986988204133 |
| C | -3.51711868073169 | -0.09224198182903 | -0.30415604886585 |
| C | -0.73511901668256 | -0.03162504229788 | 2.23396073687394  |
| C | -2.85950612825501 | -0.09162323915370 | 0.98341287712239  |
| C | -2.69800602269307 | -0.05478274234661 | -1.46285457559523 |
| C | -3.56279745201750 | -0.13432719848506 | 2.20105786354967  |
| H | -4.65274597095698 | -0.17204229619601 | 2.20770607397741  |
| C | -4.90562476924558 | -0.12484520419622 | -0.45434700625192 |
| H | -5.61086964268059 | -0.15340788190442 | 0.37478452051801  |
| C | -1.47210785935368 | -0.08052961543544 | 3.41488340718642  |
| H | -0.96812114690884 | -0.08182973816614 | 4.38146218586376  |
| C | -4.70699711993225 | -0.08483623182264 | -2.80528827220896 |
| H | -5.27333454853805 | -0.08497037285239 | -3.73620139099739 |
| C | -3.34626806754591 | -0.05266472651940 | -2.72126896821866 |
| H | -2.74498700717313 | -0.02424806162192 | -3.63152866520834 |
| C | -2.87019537848079 | -0.13171689832229 | 3.39650641116761  |
| H | -3.41662945362875 | -0.16923872848938 | 4.34152351457187  |
| O | 6.75001751968768  | 0.14983659900834  | -1.79011779803871 |
| O | -6.75013822245743 | -0.14994883427600 | -1.78961076574842 |
| N | -5.49780134004426 | -0.12128229871686 | -1.67131539370683 |
| N | 5.49768949291810  | 0.12117206087334  | -1.67172886888254 |

2,2'-*N*-oxide-pBiphe (**43**),  $S_{0,eq}$  in water

|   |                  |                  |                   |
|---|------------------|------------------|-------------------|
| N | 1.34797589628213 | 0.01622439975782 | -1.42382107524183 |
| C | 1.43878901746491 | 0.04779706379909 | 0.99397028035187  |
| C | 0.73872253472604 | 0.01548390660599 | -0.26455403316186 |
| C | 3.51450537216179 | 0.09327086669504 | -0.30483178349806 |
| C | 0.73458704149307 | 0.03477049830071 | 2.22957565459586  |
| C | 2.85766434369947 | 0.09730985188701 | 0.98135132608581  |
| C | 2.70080406459316 | 0.04849575902226 | -1.46511152625603 |
| C | 3.56138757775237 | 0.14641853628863 | 2.19824067597917  |

|   |                   |                   |                   |
|---|-------------------|-------------------|-------------------|
| H | 4.65096605192725  | 0.18722510038528  | 2.20438433327015  |
| C | 4.90371827120594  | 0.12677215792592  | -0.45091378045869 |
| H | 5.60582827225670  | 0.16073013591503  | 0.38067489728440  |
| C | 1.47044460407000  | 0.09002408317029  | 3.41051340361456  |
| H | 0.96529024304313  | 0.09264240723525  | 4.37622107419949  |
| C | 4.71361506459294  | 0.07255950473659  | -2.79937368607057 |
| H | 5.28137971245331  | 0.06738817780859  | -3.72918085079319 |
| C | 3.35213020670513  | 0.03950322175875  | -2.72070125332702 |
| H | 2.75789935301787  | 0.00519925766042  | -3.63463414526676 |
| C | 2.86834274181477  | 0.14608199769155  | 3.39310087407386  |
| H | 3.41380097862775  | 0.18881588151893  | 4.33805524569470  |
| N | -1.34807002884825 | -0.01633764254722 | -1.42371846926231 |
| C | -1.43870137051219 | -0.04787569841852 | 0.99407960554422  |
| C | -0.73872932448494 | -0.01558115546901 | -0.26449770046768 |
| C | -3.51451548629811 | -0.09336275048837 | -0.30456606081116 |
| C | -0.73440640245432 | -0.03483317483686 | 2.22963170064216  |
| C | -2.85757781246026 | -0.09738646533571 | 0.98156779722859  |
| C | -2.70090111311249 | -0.04860690239517 | -1.46490737210308 |
| C | -3.56120954249726 | -0.14647863162683 | 2.19851072786722  |
| H | -4.65078747303678 | -0.18728395179322 | 2.20473773089349  |
| C | -4.90373933624950 | -0.12686062025644 | -0.45054431955614 |
| H | -5.60578857925533 | -0.16080326144784 | 0.38109610420777  |
| C | -1.47017514127078 | -0.09007067573153 | 3.41062556467489  |
| H | -0.96494844142021 | -0.09267684581254 | 4.37629548960292  |
| C | -4.71381123750975 | -0.07268345145109 | -2.79901939654989 |
| H | -5.28164496379200 | -0.06752360942609 | -3.72878446472565 |
| C | -3.35232044800862 | -0.03963085268596 | -2.72044882415753 |
| H | -2.75815671518698 | -0.00534233486160 | -3.63442594441919 |
| C | -2.86807463038892 | -0.14612762816055 | 3.39331873901963  |
| H | -3.41346197304087 | -0.18884899518646 | 4.33831463747263  |
| O | 6.75901310014511  | 0.14617372431010  | -1.77641954914711 |
| O | -6.75913318883306 | -0.14627157731240 | -1.77591139208502 |
| N | -5.49358483160650 | -0.11666419295451 | -1.66304353614509 |

N 5.49347359223426 0.11656088572465 -1.66345669879953

2-dimethylamino-2'-*N*-oxide-pBiphe (**44**), S<sub>0,eq</sub> in vacuum

N 1.24510231754943 -0.12619385213719 -1.54857093071306  
C 1.42360271705403 0.15605041949391 0.84176095142108  
C 0.67539152206612 -0.01505511836409 -0.37865572917478  
C 3.46277533614622 0.08056635039087 -0.53753249939467  
C 0.76506885210266 0.27379647742020 2.09745206441884  
C 2.84115585578163 0.20538417972217 0.76455057772342  
C 2.59286359071333 -0.08291471618788 -1.65112498761084  
C 3.58101219172494 0.37301867486712 1.95075119624628  
H 4.66996322760632 0.41366259857735 1.91460692736567  
C 4.85027211205103 0.11291455107300 -0.74283406392732  
H 5.50617616503060 0.23737481685703 0.11539459329916  
C 1.54243655409484 0.43837583675495 3.24070738078088  
H 1.07147385955337 0.53245050062653 4.21907020184992  
C 4.52434004030520 -0.17428286416431 -3.12824778691602  
H 4.92062182384199 -0.27371096450293 -4.13806705550287  
C 3.16630730383262 -0.20764095295893 -2.93915074776995  
H 2.47943500441015 -0.33186239320015 -3.77822473612159  
C 5.41105059074235 -0.01136623575645 -2.02230729921496  
C 2.93783438778939 0.48743462894207 3.16712331420839  
H 3.51998330457616 0.61756854131430 4.08210184673200  
N -1.45124656541605 -0.22453438034910 -1.44328464731047  
C -1.45497418608228 0.05113408125976 0.95926092011132  
C -0.79765472148160 -0.06890058026110 -0.32135154338985  
C -3.57974437109587 -0.17512008979476 -0.24497664911712  
C -0.70506391317735 0.21951037706731 2.15689738781576  
C -2.87337246305039 -0.00208667602139 1.00503056193400  
C -2.79996527211077 -0.27843487491051 -1.42640196820396  
C -3.52961040878401 0.11330875943400 2.24366849685634  
H -4.61815377941771 0.07497044259241 2.29454413960204  
C -4.97199751637862 -0.24414407044649 -0.33947989479090



|   |                   |                   |                   |
|---|-------------------|-------------------|-------------------|
| H | -5.65682001837794 | -0.17610192693787 | 0.50350920773059  |
| C | -1.39966306491634 | 0.32832940516067  | 3.35956606340212  |
| H | -0.85803296692374 | 0.45731529652827  | 4.29638286494878  |
| C | -4.85705193152879 | -0.50814467139310 | -2.67988569005888 |
| H | -5.46407227841556 | -0.63626657222997 | -3.57504271520730 |
| C | -3.49495516680270 | -0.44775632306849 | -2.64890896916541 |
| H | -2.91391376698058 | -0.52913215655012 | -3.56839218743286 |
| C | -2.79582630307617 | 0.27604777571999  | 3.40235710201349  |
| H | -3.30761890627264 | 0.36507487256196  | 4.36308083921847  |
| N | -5.61310004515485 | -0.40693319178396 | -1.52326241206899 |
| N | 6.76828806623280  | 0.02138995118086  | -2.21554676748634 |
| C | 7.31978976233038  | -0.11412541655963 | -3.53898889719600 |
| H | 6.98695491389717  | 0.69295744446531  | -4.21579346540693 |
| H | 8.41378707985977  | -0.06729355734455 | -3.48026801863732 |
| H | 7.05180484305868  | -1.07798294458233 | -4.00725975373742 |
| C | 7.64515224482783  | 0.18848851816724  | -1.08782663644473 |
| H | 8.68605410797992  | 0.19671529205266  | -1.43245076207520 |
| H | 7.45887242752940  | 1.13892033487472  | -0.55546725073716 |
| H | 7.53937452125822  | -0.63150235775473 | -0.35418953135773 |
| O | -6.86130707850275 | -0.46687323984465 | -1.59012304150785 |

2,2',10,10'-tetra-*N*-oxide-pBiphe (**45**),  $S_{0,eq}$  in vacuum

|   |                  |                  |                   |
|---|------------------|------------------|-------------------|
| N | 1.35065061381346 | 0.03573754675625 | -1.39076483533807 |
| C | 1.44040646405432 | 0.03827339406323 | 1.01990297390918  |
| C | 0.73625213980972 | 0.01950168507590 | -0.23770323450088 |
| C | 3.53856952152146 | 0.09397257937370 | -0.27684803858922 |
| C | 0.72598402045598 | 0.01931587275393 | 2.24336444884439  |
| C | 2.85567397439849 | 0.07591331069128 | 0.99207553080225  |
| C | 2.69445579271092 | 0.07143210753771 | -1.43192921635667 |
| C | 4.92702548600829 | 0.13087645825525 | -0.45617214404105 |
| H | 5.63665466147260 | 0.14982082443055 | 0.36292406169610  |
| C | 1.48830967612265 | 0.03968589784574 | 3.41293073063663  |
| H | 1.02487323524088 | 0.02743978773152 | 4.39918833903536  |

|   |                   |                   |                   |
|---|-------------------|-------------------|-------------------|
| C | 4.67558746252423  | 0.12395914062154  | -2.81560843278574 |
| H | 5.23249893677173  | 0.13867169836107  | -3.75159861922985 |
| C | 3.31935838876226  | 0.08791996165228  | -2.70145754972719 |
| H | 2.68427758584858  | 0.07095578377711  | -3.58765947837366 |
| C | 2.86262794620465  | 0.07627621897755  | 3.36399482844373  |
| H | 3.51047244498487  | 0.09359671809569  | 4.23924892699706  |
| N | -1.35076301276960 | -0.03584135132366 | -1.39065282121495 |
| C | -1.44032008725376 | -0.03833568796100 | 1.02002246615053  |
| C | -0.73626948760955 | -0.01958561292476 | -0.23764212107218 |
| C | -3.53859014628534 | -0.09405707768235 | -0.27655448021190 |
| C | -0.72579679835697 | -0.01935700128448 | 2.24342476589851  |
| C | -2.85558979606470 | -0.07597608452464 | 0.99231249371734  |
| C | -2.69457160481120 | -0.07153645144821 | -1.43170568724708 |
| C | -4.92706084437621 | -0.13096393014550 | -0.45576346457389 |
| H | -5.63662243099484 | -0.14989454007195 | 0.36339159799605  |
| C | -1.48802581692215 | -0.03970671611561 | 3.41305433707340  |
| H | -1.02450798556270 | -0.02744300863557 | 4.39927349594410  |
| C | -4.67581746830987 | -0.12408685338949 | -2.81522051885566 |
| H | -5.23280583291153 | -0.13881540517477 | -3.75116468539293 |
| C | -3.31957894431975 | -0.08804603589596 | -2.70118209331744 |
| H | -2.68457152678004 | -0.07109732272646 | -3.58743690208047 |
| C | -2.86234814281109 | -0.07629793645543 | 3.36423238397072  |
| H | -3.51012086908285 | -0.09360317292828 | 4.23953990258680  |
| N | 3.55852880650106  | 0.09470627053095  | 2.19252056490288  |
| N | -3.55834558102221 | -0.09474899025987 | 2.19281589650136  |
| N | -5.48973184009891 | -0.14582361176566 | -1.69520521839172 |
| N | 5.48959420233090  | 0.14571523746923  | -1.69566051776855 |
| O | 4.80862549080618  | 0.12798341536538  | 2.23000516927842  |
| O | -4.80843912022353 | -0.12802657336357 | 2.23040417600253  |
| O | -6.72754326886476 | -0.17873166611462 | -1.83901952274889 |
| O | 6.72739375508833  | 0.17862112082595  | -1.83957750856939 |

2,2',10,10'-tetra-*N*-oxide-pBiphe (**45**),  $S_{0,eq}$  in chloroform

|   |                   |                   |                   |
|---|-------------------|-------------------|-------------------|
| N | 1.34876820449547  | 0.02755035168370  | -1.38913814641488 |
| C | 1.44003942958794  | 0.04472388831577  | 1.02177536111001  |
| C | 0.73678939458447  | 0.01829850494917  | -0.23495640933893 |
| C | 3.53464874306908  | 0.09574669318755  | -0.27705652506069 |
| C | 0.72638590380951  | 0.02804267393591  | 2.24465058766275  |
| C | 2.85483053480236  | 0.08915023546694  | 0.99362300738717  |
| C | 2.69515816876897  | 0.06148088674071  | -1.43316670950722 |
| C | 4.92317760195323  | 0.12953407855995  | -0.46008955387110 |
| H | 5.63045889897948  | 0.15647707402678  | 0.36067044632219  |
| C | 1.48655356559123  | 0.06897793841050  | 3.41475743993207  |
| H | 1.02610963025312  | 0.06744342777858  | 4.40251585273098  |
| C | 4.67658911902178  | 0.09624621874436  | -2.81562672134415 |
| H | 5.22623276319014  | 0.09915737201760  | -3.75649911629467 |
| C | 3.31928285004831  | 0.06358409398065  | -2.70202383882136 |
| H | 2.69267742371679  | 0.03763543517701  | -3.59452696493230 |
| C | 2.86068541399193  | 0.11600743391501  | 3.36263139065983  |
| H | 3.50056395743704  | 0.14941763780878  | 4.24386764539549  |
| N | -1.34888095838987 | -0.02765431971756 | -1.38902561725738 |
| C | -1.43995297284559 | -0.04478519605614 | 1.02189527279153  |
| C | -0.73680664965483 | -0.01838180568453 | -0.23489487614538 |
| C | -3.53466963832462 | -0.09583115026499 | -0.27676284635566 |
| C | -0.72619853625692 | -0.02808231405698 | 2.24471126666074  |
| C | -2.85474631775979 | -0.08921306780833 | 0.99386044391974  |
| C | -2.69527443659534 | -0.06158573389931 | -1.43294275016094 |
| C | -4.92321360363797 | -0.12962096661165 | -0.45968124495553 |
| H | -5.63042822425252 | -0.15654928013269 | 0.36113670394706  |
| C | -1.48626952470584 | -0.06899776049977 | 3.41488161496273  |
| H | -1.02574390381967 | -0.06744568058401 | 4.40260196338571  |
| C | -4.67681883832688 | -0.09637459186400 | -2.81523944708207 |
| H | -5.22653987759121 | -0.09930194287357 | -3.75606656756022 |
| C | -3.31950328402876 | -0.06371096337593 | -2.70174862386351 |
| H | -2.69297078853273 | -0.03777809188767 | -3.59430342601458 |
| C | -2.86040564083694 | -0.11603006022022 | 3.36286986897193  |

|   |                   |                   |                   |
|---|-------------------|-------------------|-------------------|
| H | -3.50021151218635 | -0.14942612211773 | 4.24415938485105  |
| N | 3.55383481249992  | 0.12394055086432  | 2.19254742079130  |
| N | -3.55365152688574 | -0.12398417336104 | 2.19284310175792  |
| N | -5.48363915424806 | -0.12951514277617 | -1.69561320031681 |
| N | 5.48350161294877  | 0.12940747985077  | -1.69606752804514 |
| O | 4.80966586283097  | 0.16409476842755  | 2.22855164173056  |
| O | -4.80947945347825 | -0.16413986261155 | 2.22895108976716  |
| O | -6.73060759862839 | -0.15914793850236 | -1.83470689198092 |
| O | 6.73045854940575  | 0.15903942106457  | -1.83526449941451 |

2,2',10,10'-tetra-*N*-oxide-pBiphe (**45**), S<sub>0,eq</sub> in methanol

|   |                   |                   |                   |
|---|-------------------|-------------------|-------------------|
| N | 1.34674537791574  | 0.01974868399482  | -1.38876005255316 |
| C | 1.43984457720158  | 0.04897664413321  | 1.02196120140427  |
| C | 0.73752441154253  | 0.01709187485002  | -0.23426256070800 |
| C | 3.53140133139044  | 0.09771526718753  | -0.27671210775956 |
| C | 0.72661055388869  | 0.03284498465920  | 2.24413230730707  |
| C | 2.85388720213730  | 0.09806287474981  | 0.99465371023511  |
| C | 2.69512271454243  | 0.05324348611164  | -1.43280822301765 |
| C | 4.92014675060300  | 0.13175175602911  | -0.46261502106620 |
| H | 5.63018213344146  | 0.16648021027209  | 0.35549868739125  |
| C | 1.48280067494142  | 0.08335429692139  | 3.41481835426782  |
| H | 1.02381170215200  | 0.08442040910753  | 4.40322393936753  |
| C | 4.67526131286476  | 0.07742071361463  | -2.81450200984187 |
| H | 5.22176715979419  | 0.07239977457073  | -3.75750974803168 |
| C | 3.31735164528295  | 0.04483285784468  | -2.70123527599733 |
| H | 2.69474560144783  | 0.01079878479992  | -3.59625569507148 |
| C | 2.85707328041653  | 0.13743754537509  | 3.36100754604342  |
| H | 3.49265200536033  | 0.17885085167033  | 4.24546007101607  |
| N | -1.34685818391097 | -0.01985503678173 | -1.38864768558040 |
| C | -1.43975819049803 | -0.04903825519481 | 1.02208118014675  |
| C | -0.73754167977677 | -0.01717657996608 | -0.23420092811070 |
| C | -3.53142222283982 | -0.09780024837064 | -0.27641857488950 |
| C | -0.72642331967983 | -0.03288347976049 | 2.24419304301946  |

|   |                   |                   |                   |
|---|-------------------|-------------------|-------------------|
| C | -2.85380294966107 | -0.09812681078691 | 0.99489134092489  |
| C | -2.69523901012214 | -0.05335015881848 | -1.43258436970347 |
| C | -4.92018288807801 | -0.13183662489128 | -0.46220701553478 |
| H | -5.63015141442800 | -0.16654749016504 | 0.35596544720633  |
| C | -1.48251680390626 | -0.08337236651810 | 3.41494233541703  |
| H | -1.02344578962466 | -0.08441896494354 | 4.40330984864030  |
| C | -4.67549102667931 | -0.07754889071460 | -2.81411521961308 |
| H | -5.22207428909804 | -0.07254378652930 | -3.75707819505984 |
| C | -3.31757200952894 | -0.04496153627914 | -2.70096052989402 |
| H | -2.69503882738834 | -0.01094465800190 | -3.59603233010349 |
| C | -2.85679373063961 | -0.13746080986825 | 3.36124616560261  |
| H | -3.49229965455424 | -0.17886062465301 | 4.24575155752163  |
| N | 3.54727725037923  | 0.14204426250384  | 2.19305066137932  |
| N | -3.54709393345414 | -0.14209054496837 | 2.19334613774303  |
| N | -5.47490048335906 | -0.12121565395260 | -1.69520602200440 |
| N | 5.47476298845122  | 0.12111066768830  | -1.69565946858896 |
| O | 4.81023534054599  | 0.18776356386276  | 2.23073226030401  |
| O | -4.81004857085647 | -0.18781499408316 | 2.23113196316375  |
| O | -6.73321720040325 | -0.15108558312344 | -1.83248440775631 |
| O | 6.73306816418733  | 0.15098358842420  | -1.83304231721582 |

2,2',10,10'-tetra-*N*-oxide-pBiphe (**45**),  $S_{0,eq}$  in water

|   |                  |                  |                   |
|---|------------------|------------------|-------------------|
| N | 1.34865350173756 | 0.01472806192862 | -1.39246611485468 |
| C | 1.43926577244312 | 0.05099950873440 | 1.01822813540925  |
| C | 0.73754727001323 | 0.01623662190239 | -0.23816763804543 |
| C | 3.53163672842513 | 0.09877327316712 | -0.27714451798020 |
| C | 0.72615503417646 | 0.03480240504707 | 2.24014234491100  |
| C | 2.85300623049693 | 0.10226998486203 | 0.99286240240753  |
| C | 2.69785860306861 | 0.04840565702162 | -1.43401612702083 |
| C | 4.92055079645871 | 0.13405332681353 | -0.45954201559688 |
| H | 5.62728574378195 | 0.17357556432499 | 0.36069242225921  |
| C | 1.48035975494173 | 0.08856231438741 | 3.41172475058730  |
| H | 1.01962798946187 | 0.08958714395652 | 4.39899291472267  |

|   |                   |                   |                   |
|---|-------------------|-------------------|-------------------|
| C | 4.68162250478912  | 0.06828718920821  | -2.81079539405738 |
| H | 5.22900866575336  | 0.05941758515279  | -3.75276924005196 |
| C | 3.32370741156470  | 0.03469934749449  | -2.70037120973711 |
| H | 2.70579139732070  | -0.00407871552131 | -3.59781907200419 |
| C | 2.85407554293848  | 0.14596888770984  | 3.35931857777264  |
| H | 3.48799703656764  | 0.19030849004370  | 4.24428044853268  |
| N | -1.34876659160154 | -0.01483636996411 | -1.39235365987123 |
| C | -1.43917968551003 | -0.05106195883059 | 1.01834819296236  |
| C | -0.73756487099499 | -0.01632294453594 | -0.23810598618977 |
| C | -3.53165765727333 | -0.09885851870833 | -0.27685085846947 |
| C | -0.72596815085660 | -0.03484131365817 | 2.24020315172814  |
| C | -2.85292211863450 | -0.10233454514256 | 0.99310012003951  |
| C | -2.69797497687325 | -0.04851353179921 | -1.43379206866844 |
| C | -4.92058673942368 | -0.13413688027171 | -0.45913387077665 |
| H | -5.62725473331024 | -0.17364030917398 | 0.36115919382088  |
| C | -1.48007621257201 | -0.08858021275585 | 3.41184874247361  |
| H | -1.01926255149010 | -0.08958501538796 | 4.39907871924617  |
| C | -4.68185182131340 | -0.06841496114370 | -2.81040821237113 |
| H | -5.22931522625422 | -0.05956081123415 | -3.75233731001075 |
| C | -3.32392759366311 | -0.03482905760062 | -2.70009607849047 |
| H | -2.70608454602729 | 0.00393086122819  | -3.59759499025789 |
| C | -2.85379618289159 | -0.14599222228219 | 3.35955719005907  |
| H | -3.48764493860038 | -0.19031815546295 | 4.24457177569717  |
| N | 3.54534785938891  | 0.15031155168489  | 2.19194455332189  |
| N | -3.54516463303247 | -0.15035845337965 | 2.19224007271536  |
| N | -5.47883572413409 | -0.11858792947227 | -1.69019036852805 |
| N | 5.47869864979826  | 0.11848484645659  | -1.69064414114862 |
| O | 4.80968170671310  | 0.19933533861238  | 2.23174035268527  |
| O | -4.80949480495914 | -0.19938794030092 | 2.23214014140765  |
| O | -6.73935826459404 | -0.14974878644654 | -1.82445845164232 |
| O | 6.73920982417041  | 0.14965067333591  | -1.82501687698597 |

2,2',10,10'-tetra-*N*-oxide-pBiphe (**45**), T<sub>1,eq</sub> in vacuum

|   |                   |                   |                   |
|---|-------------------|-------------------|-------------------|
| N | 1.34780059246168  | 0.03568783603948  | -1.41622019812904 |
| C | 1.41809179194198  | 0.03767019403736  | 1.01744477095339  |
| C | 0.71576326328278  | 0.01896380162351  | -0.22413468647172 |
| C | 3.51903617768537  | 0.09345551198001  | -0.27582261810429 |
| C | 0.70776095016050  | 0.01881663072052  | 2.25136860448833  |
| C | 2.84156039808138  | 0.07551993939695  | 0.99276545600850  |
| C | 2.66203794753143  | 0.07060385023349  | -1.44374392159208 |
| C | 4.90030910271495  | 0.13016098780222  | -0.45252719849470 |
| H | 5.60928959480902  | 0.14906623954017  | 0.36798902785451  |
| C | 1.49002631251451  | 0.03969915070463  | 3.44128572809743  |
| H | 1.02455894042684  | 0.02739985533520  | 4.42610162940795  |
| C | 4.65726952831565  | 0.12351283169195  | -2.82795874007409 |
| H | 5.22325193874160  | 0.13847752492494  | -3.75883255315834 |
| C | 3.30944234426606  | 0.08771166618466  | -2.72376031392382 |
| H | 2.67613012454536  | 0.07081585790509  | -3.61097977944323 |
| C | 2.84305829439890  | 0.07570706111062  | 3.38223149968551  |
| H | 3.50901266866271  | 0.09349570113844  | 4.24354634833456  |
| N | -1.34791508891682 | -0.03579133910693 | -1.41610845041318 |
| C | -1.41800558423546 | -0.03773221005993 | 1.01756237736264  |
| C | -0.71577942626447 | -0.01904694543841 | -0.22407534544067 |
| C | -3.51905658976349 | -0.09354029974766 | -0.27553074849765 |
| C | -0.70757305923877 | -0.01885721046039 | 2.25142731092496  |
| C | -2.84147618737219 | -0.07558280865299 | 0.99300113138159  |
| C | -2.66215472141691 | -0.07070813167989 | -1.44352314437523 |
| C | -4.90034410272706 | -0.13024924247000 | -0.45212073025794 |
| H | -5.60925684237193 | -0.14914089009187 | 0.36845433372161  |
| C | -1.48974022054739 | -0.03971924826548 | 3.44140932894955  |
| H | -1.02419155293594 | -0.02740275408479 | 4.42618660367395  |
| C | -4.65750056936468 | -0.12364091205440 | -2.82757237354627 |
| H | -5.22355981876687 | -0.13862135679706 | -3.75839921509070 |
| C | -3.30966480326546 | -0.08783762218088 | -2.72348580248610 |
| H | -2.67642584980892 | -0.07095646394937 | -3.61075785374821 |
| C | -2.84277707619160 | -0.07572856301342 | 3.38246732718939  |

|   |                   |                   |                   |
|---|-------------------|-------------------|-------------------|
| H | -3.50866043974411 | -0.09350239373788 | 4.24383735488691  |
| N | 3.53495508393434  | 0.09404028992738  | 2.18053559952828  |
| N | -3.53477292106369 | -0.09408289401949 | 2.18082879752776  |
| N | -5.46367902680946 | -0.14514281069825 | -1.69470776600024 |
| N | 5.46354147936869  | 0.14503346196790  | -1.69516101524278 |
| O | 4.79151149546024  | 0.12748613628458  | 2.23316494668947  |
| O | -4.79132498677256 | -0.12752828444809 | 2.23356230679657  |
| O | -6.71040651994784 | -0.17827746396791 | -1.83554567324004 |
| O | 6.71025735822164  | 0.17816531637596  | -1.83610235573260 |

2,2',10,10'-tetra-*N*-oxide-pBiphe (**45**), S<sub>1,eq</sub> in vacuum

|   |                   |                   |                   |
|---|-------------------|-------------------|-------------------|
| N | 1.33024248723422  | 0.03524374604096  | -1.39979729373339 |
| C | 1.43913414566015  | 0.03829643580166  | 1.02831247327879  |
| C | 0.73396023833748  | 0.01946783249371  | -0.22725323144628 |
| C | 3.51365847282271  | 0.09337554528811  | -0.27754045160102 |
| C | 0.71329135522771  | 0.01899841176202  | 2.25561528980707  |
| C | 2.84890951468443  | 0.07584472432583  | 0.99967977136443  |
| C | 2.67094453708410  | 0.07085627210363  | -1.43753398611873 |
| C | 4.89993975612989  | 0.13014314112987  | -0.45888382559495 |
| H | 5.59981675987666  | 0.14882249304963  | 0.37163706317119  |
| C | 1.50083380869695  | 0.04004343142278  | 3.43033387574174  |
| H | 1.04272951328802  | 0.02787015875926  | 4.41908360942521  |
| C | 4.64920022588676  | 0.12317503565767  | -2.82946842704762 |
| H | 5.20973396919801  | 0.13792705016464  | -3.76330114139905 |
| C | 3.29510792153029  | 0.08726970395195  | -2.71322077294095 |
| H | 2.65570942000146  | 0.07019470021319  | -3.59642242345411 |
| C | 2.86684508638661  | 0.07648604181830  | 3.36828387200145  |
| H | 3.52156765492856  | 0.09400277753051  | 4.23865047569073  |
| N | -1.33035578385482 | -0.03534739782984 | -1.39968698728337 |
| C | -1.43904705456207 | -0.03835880361732 | 1.02843182466534  |
| C | -0.73397680167687 | -0.01955170610497 | -0.22719239325765 |
| C | -3.51367913030151 | -0.09346029899613 | -0.27724893853629 |
| C | -0.71310298502060 | -0.01903960224436 | 2.25567443032064  |



|   |                   |                   |                   |
|---|-------------------|-------------------|-------------------|
| C | -2.84882476837975 | -0.07590751777104 | 0.99991610158842  |
| C | -2.67106093481706 | -0.07096062355099 | -1.43731236901054 |
| C | -4.89997537145352 | -0.13023111477457 | -0.45847736989307 |
| H | -5.59978381944122 | -0.14889638419954 | 0.37210159080998  |
| C | -1.50054855292701 | -0.04006407723581 | 3.43045830005414  |
| H | -1.04236267168574 | -0.02787355447727 | 4.41917003344451  |
| C | -4.64943135674827 | -0.12330305916633 | -2.82908275706538 |
| H | -5.21004204570049 | -0.13807089860074 | -3.76286901514236 |
| C | -3.29532950021601 | -0.08739559690875 | -2.71294737178524 |
| H | -2.65600370629782 | -0.07033541589888 | -3.59620192170651 |
| C | -2.86656495649567 | -0.07650767961481 | 3.36852164267421  |
| H | -3.52121572741435 | -0.09400914488077 | 4.23894255526614  |
| N | 3.56496671567373  | 0.09504808587359  | 2.18796049085783  |
| N | -3.56478392782014 | -0.09509026934483 | 2.18825617688683  |
| N | -5.45668171705885 | -0.14483541483180 | -1.70229243260700 |
| N | 5.45654349671307  | 0.14472627678571  | -1.70274504701593 |
| O | 4.83064806867320  | 0.12884277048631  | 2.22474327357446  |
| O | -4.83046223833718 | -0.12888431177675 | 2.22514385294626  |
| O | -6.69553701480480 | -0.17766239988597 | -1.84639162038093 |
| O | 6.69538691697974  | 0.17755063705212  | -1.84694692654906 |

**46, S<sub>0,eq</sub> in vacuum**

|   |                  |                  |                   |
|---|------------------|------------------|-------------------|
| N | 1.34475697655650 | 0.03447991188673 | -1.43535729091038 |
| C | 1.43080412680227 | 0.04828946491617 | 0.98427785992401  |
| C | 0.73619865904977 | 0.02318813335473 | -0.28211426875760 |
| C | 3.50084701281883 | 0.09974363290677 | -0.30385513290759 |
| C | 0.75030972441141 | 0.03493669736960 | 2.21943681768106  |
| C | 2.84728562079790 | 0.08760588298570 | 0.95150886942105  |
| C | 2.70567373944260 | 0.07190671865512 | -1.48276947280639 |
| C | 3.60732419858740 | 0.11450416861279 | 2.15200274460525  |
| C | 4.91989238781288 | 0.13876184439339 | -0.38087462143418 |
| C | 1.52105357899440 | 0.06213212938720 | 3.39520887083079  |
| H | 1.02732824715225 | 0.05302143281041 | 4.36717740228475  |

|   |                   |                   |                   |
|---|-------------------|-------------------|-------------------|
| C | 4.73903853560989  | 0.12179273696471  | -2.80439482091852 |
| H | 5.22705979721704  | 0.13049227055111  | -3.78185043003576 |
| C | 3.35020548215421  | 0.08363163744807  | -2.73162001850651 |
| H | 2.72538841418676  | 0.06192234386635  | -3.62599042518684 |
| C | 5.51995698988020  | 0.14916015122492  | -1.64858031639193 |
| H | 6.60982441502041  | 0.17900619244983  | -1.72376190744440 |
| C | 2.90675088551695  | 0.10078582459916  | 3.36733070688374  |
| H | 3.46524095473355  | 0.12089994099699  | 4.30655853594509  |
| N | -1.36307621834886 | -0.03888533163916 | -1.41438453657948 |
| C | -1.43245816760184 | -0.03147750218344 | 1.00277882850778  |
| C | -0.74535405343687 | -0.01748059419481 | -0.26783563839450 |
| C | -3.52798175379183 | -0.09499780027631 | -0.28165958106714 |
| C | -0.71698571194934 | -0.00634290761319 | 2.23503497148692  |
| C | -2.85129108136064 | -0.07118082043678 | 0.99553024774266  |
| C | -2.72114301300575 | -0.07674513904062 | -1.45243176860880 |
| C | -3.54008422447739 | -0.08559638927531 | 2.22507269597047  |
| H | -4.62959275481894 | -0.11598479123327 | 2.24153423905896  |
| C | -4.93014394504126 | -0.13478240395681 | -0.43051705796116 |
| H | -5.57255206478384 | -0.14956407236470 | 0.45118025648613  |
| C | -1.44372775627678 | -0.02204703111443 | 3.42248680393213  |
| H | -0.92843599934801 | -0.00382607769622 | 4.38278516535774  |
| C | -4.70945029662231 | -0.13721932564462 | -2.84201250398404 |
| H | -5.17833100692646 | -0.15380340089079 | -3.82854880083429 |
| C | -3.33725253795119 | -0.09849600640105 | -2.72619419594280 |
| H | -2.67811738657081 | -0.08323665093737 | -3.59583073663541 |
| C | -5.51018061428073 | -0.15548061731940 | -1.68403561785141 |
| H | -6.59826099194009 | -0.18623201935498 | -1.77619824601398 |
| C | -2.84184051233712 | -0.06134750811839 | 3.41552929748531  |
| H | -3.38308367159660 | -0.07278009525892 | 4.36424466495935  |
| C | 5.03645397188481  | 0.15381131365035  | 2.05677027114416  |
| C | 5.66390098976435  | 0.16538645779959  | 0.84615764834245  |
| H | 5.61935165285565  | 0.17443598219894  | 2.98100355785304  |
| H | 6.75509740121660  | 0.19541161592199  | 0.79210693327024  |

47,  $S_{0,eq}$  in vacuum

|   |                   |                   |                   |
|---|-------------------|-------------------|-------------------|
| N | 1.36118444949011  | 0.03513249799956  | -1.45003059338222 |
| C | 1.42821674995057  | 0.04808760818722  | 0.97236914148091  |
| C | 0.74341886035590  | 0.02333968773221  | -0.30097711126778 |
| C | 3.50768376639979  | 0.10001145775290  | -0.30140553334664 |
| C | 0.74121025755637  | 0.03447649976645  | 2.20700478660734  |
| C | 2.84477169973782  | 0.08737947254918  | 0.94932403983774  |
| C | 2.72173331930538  | 0.07265214915359  | -1.48669846834151 |
| C | 3.59760204041163  | 0.11383721862383  | 2.15533213785963  |
| C | 4.92737263906098  | 0.13908621347765  | -0.36843465919377 |
| C | 1.50518493166531  | 0.06115315742862  | 3.38766706503940  |
| H | 1.00413705396010  | 0.05162535073784  | 4.35603531468802  |
| C | 4.76460662132349  | 0.12313448290755  | -2.79367516511228 |
| H | 5.26008049681564  | 0.13225921065149  | -3.76736276618957 |
| C | 3.37563058268781  | 0.08491827482854  | -2.73122263280421 |
| H | 2.75727460990303  | 0.06354279751700  | -3.63006499939690 |
| C | 5.53665510790352  | 0.15002485355043  | -1.63168281922982 |
| H | 6.62706820927247  | 0.17993074420872  | -1.69856373657094 |
| C | 2.89069945706720  | 0.09970202346726  | 3.36714421907473  |
| H | 3.44470438726485  | 0.11942968465680  | 4.30903639896851  |
| N | -1.36171471962504 | -0.03952302786769 | -1.44206818236087 |
| C | -1.41516601928734 | -0.03092041599463 | 0.98069321601703  |
| C | -0.73751754520609 | -0.01752893915973 | -0.29664438139778 |
| C | -3.50173631300718 | -0.09409528495745 | -0.28089142514868 |
| C | -0.72124909463398 | -0.00636699487112 | 2.21128646090191  |
| C | -2.83182508980069 | -0.07036706035569 | 0.96594004662487  |
| C | -2.72244860624788 | -0.07731585136297 | -1.47076942738525 |
| C | -3.57787797683454 | -0.08608353680575 | 2.17634042641428  |
| C | -4.92177847746298 | -0.13370556625469 | -0.33960985355484 |
| C | -1.47858526477836 | -0.02254465978284 | 3.39640663227314  |
| H | -0.97213353537668 | -0.00446611835402 | 4.36183515306052  |
| C | -4.77262126873513 | -0.13934396879096 | -2.76577159297729 |

|   |                   |                   |                   |
|---|-------------------|-------------------|-------------------|
| H | -5.27354208454572 | -0.15710778187854 | -3.73654869198150 |
| C | -3.38331748853555 | -0.10063000335653 | -2.71144892415523 |
| H | -2.77001141050504 | -0.08727721743242 | -3.61389835823585 |
| C | -5.53813653618298 | -0.15585989303351 | -1.59927344521681 |
| H | -6.62890849157970 | -0.18631041029562 | -1.65975534302016 |
| C | -2.86419269631066 | -0.06122583405232 | 3.38399470445307  |
| H | -3.41290494378526 | -0.07259037584419 | 4.32911719340939  |
| C | 5.02699784806404  | 0.15317055047411  | 2.06961965180407  |
| C | 5.66307611821716  | 0.16523941829689  | 0.86347296155691  |
| H | 5.60347232329354  | 0.17343803984023  | 2.99788971748308  |
| H | 6.75460267498563  | 0.19530881203993  | 0.81697900277158  |
| C | -5.00772760091376 | -0.12611735955379 | 2.09899608765760  |
| C | -5.65055863614721 | -0.14887348721029 | 0.89658830354101  |
| H | -5.57900086046332 | -0.13812025632118 | 3.03061859037130  |
| H | -6.74232954472726 | -0.17930616231203 | 0.85650685837387  |

**48, S<sub>0,eq</sub> in vacuum**

|   |                  |                   |                   |
|---|------------------|-------------------|-------------------|
| N | 1.35829682178320 | -0.03532482559328 | -1.39306561071600 |
| C | 1.45300279165627 | 0.00607850709717  | 1.02547597730559  |
| C | 0.75358776586797 | -0.02347067000575 | -0.24443647704083 |
| C | 3.54631248444542 | 0.01112293253911  | -0.27450679641282 |
| C | 0.74130518477541 | 0.01696139447115  | 2.25390334660689  |
| C | 2.87036247856962 | 0.02378625907451  | 1.01182384871990  |
| C | 2.72131189073540 | -0.01926259400321 | -1.44970966917006 |
| C | 3.56257298421438 | 0.05251617758302  | 2.23426569553313  |
| H | 4.65261137696898 | 0.06636773529075  | 2.24678203120883  |
| C | 4.92721290290361 | 0.02644380134669  | -0.42720513955103 |
| H | 5.57982177255477 | 0.04979828563964  | 0.44763162204114  |
| C | 1.47215745495692 | 0.04576522883549  | 3.44130739995368  |
| H | 0.96065216886288 | 0.05507981878672  | 4.40345857611701  |
| C | 4.70629649223417 | -0.01801719745114 | -2.86926199630635 |
| C | 3.31389391280657 | -0.03318671784397 | -2.71226714785127 |
| H | 2.64956997694304 | -0.05631418349157 | -3.57823080279211 |

|   |                   |                   |                   |
|---|-------------------|-------------------|-------------------|
| C | 5.53405102900501  | 0.01271961520141  | -1.69574959211976 |
| C | 2.86770593976621  | 0.06333053809127  | 3.42988306863680  |
| H | 3.41293440382592  | 0.08572949271969  | 4.37607744978884  |
| N | -1.33172048377548 | -0.06649364674722 | -1.40102598103913 |
| C | -1.43391818258048 | -0.03028977383771 | 1.01224163914551  |
| C | -0.72915096020620 | -0.04132109606052 | -0.24672900245354 |
| C | -3.51306499823381 | -0.07636012326384 | -0.29863953866209 |
| C | -0.73164670095318 | -0.00211818361442 | 2.24899370370908  |
| C | -2.85324738487990 | -0.04842235088613 | 0.98695645593402  |
| C | -2.68960689422502 | -0.08396268418273 | -1.45776793551241 |
| C | -3.55658476667999 | -0.03849176925750 | 2.20764830765210  |
| H | -4.64658984058863 | -0.05215434751577 | 2.21178006300862  |
| C | -4.91348286158943 | -0.09618394318804 | -0.46641141976945 |
| H | -5.56806087137510 | -0.09084462453311 | 0.40643800421291  |
| C | -1.47232241575591 | 0.00658426697061  | 3.42726096270751  |
| H | -0.97022934243639 | 0.02773131218656  | 4.39421734225106  |
| C | -4.65924048685930 | -0.12985485268158 | -2.87428585053019 |
| H | -5.11453499037990 | -0.15062369795660 | -3.86709601180724 |
| C | -3.28830560669080 | -0.11092597664545 | -2.73968172231975 |
| H | -2.61705710081468 | -0.11583175632779 | -3.60012244827417 |
| C | -5.47632617173876 | -0.12238917670548 | -1.72763717545481 |
| H | -6.56335563142407 | -0.13738736724130 | -1.83484376622911 |
| C | -2.87099777587945 | -0.01150482209489 | 3.40511385987057  |
| H | -3.42220104102050 | -0.00406031544612 | 4.34810486847646  |
| C | 6.94829796879916  | 0.02832179311519  | -1.85589468151670 |
| C | 5.32958191047056  | -0.03185640417029 | -4.15027937932297 |
| C | 7.51404718230970  | 0.01429310724859  | -3.10529792254337 |
| C | 6.69556732426362  | -0.01615002647371 | -4.26544854484758 |
| H | 7.57722977528268  | 0.05172231813325  | -0.96207654907443 |
| H | 8.60103457088130  | 0.02652123633347  | -3.21389174973660 |
| H | 7.16234367638579  | -0.02700944758616 | -5.25310393231169 |
| H | 4.69498226681840  | -0.05526124585895 | -5.03959737951413 |

49,  $S_{0,eq}$  in vacuum

|   |                   |                   |                   |
|---|-------------------|-------------------|-------------------|
| N | 1.33436973085563  | -0.03550213227493 | -1.47363120525481 |
| C | 1.36348383331445  | 0.00383104039007  | 0.94647997799798  |
| C | 0.69835487002579  | -0.02424633540355 | -0.34163393168817 |
| C | 3.49112186553275  | 0.00827079740946  | -0.29647165787623 |
| C | 0.61910857027841  | 0.01443056504151  | 2.15533280934402  |
| C | 2.78075683055623  | 0.02037652144133  | 0.97090235769869  |
| C | 2.69798700916663  | -0.02035933635633 | -1.49351869153814 |
| C | 3.44013480389457  | 0.04752103742745  | 2.21153467261703  |
| H | 4.52944707658445  | 0.06044071072504  | 2.25331770970512  |
| C | 4.87570459521065  | 0.02258328315992  | -0.41192144994293 |
| H | 5.50446017248868  | 0.04456008855336  | 0.48023879250393  |
| C | 1.31798059879427  | 0.04158178501833  | 3.36175376503051  |
| H | 0.78131305712936  | 0.05050841829396  | 4.31000782734268  |
| C | 4.72053601502595  | -0.01932354759208 | -2.85912896378003 |
| C | 3.32452618308865  | -0.03352862485661 | -2.73984339381419 |
| H | 2.68382121456572  | -0.05531451883153 | -3.62345248539628 |
| C | 5.51640543226568  | 0.00958027604814  | -1.66361341601654 |
| C | 2.71352947894809  | 0.05792107508494  | 3.38788430286146  |
| H | 3.23312690445437  | 0.07903251680570  | 4.34841568208657  |
| N | -1.35115109580989 | -0.06559513203499 | -1.55334129052182 |
| C | -1.52451711269704 | -0.03033569125212 | 0.86078092114242  |
| C | -0.78378467397360 | -0.04131502967797 | -0.38563381531842 |
| C | -3.57427442446822 | -0.07472453518549 | -0.50604012595333 |
| C | -0.85349664368897 | -0.00324517655928 | 2.11163841870781  |
| C | -2.94074134409553 | -0.04736854198644 | 0.80124441968444  |
| C | -2.71118363665451 | -0.08250330826774 | -1.65401183513971 |
| C | -3.67293031698764 | -0.03721638451916 | 2.00062349380381  |
| H | -4.76280116511004 | -0.05002245795733 | 1.97747862900931  |
| C | -4.94949835969264 | -0.09350644606243 | -0.70341891346589 |
| H | -5.63056447689045 | -0.08818521515854 | 0.14974515885077  |
| C | -1.62309450290028 | 0.00588322175815  | 3.27448214537186  |
| H | -1.14375395282227 | 0.02644407635261  | 4.25282305460681  |

|   |                   |                   |                   |
|---|-------------------|-------------------|-------------------|
| C | -4.64864496163724 | -0.12743612704028 | -3.13720515064246 |
| C | -3.26225126445920 | -0.10844727264332 | -2.93530851585694 |
| H | -2.56978057796727 | -0.11349943067459 | -3.77923083439369 |
| C | -5.51438546386846 | -0.11976788835273 | -1.99092038409530 |
| C | -3.01774105706572 | -0.01097444727196 | 3.21794752270168  |
| H | -3.59352694208177 | -0.00326939739619 | 4.14610157397200  |
| C | 6.93450070583404  | 0.02415444285499  | -1.78558269319175 |
| C | 5.37823540388450  | -0.03241740914206 | -4.12292259270321 |
| C | 7.53369799211278  | 0.01088266547887  | -3.01926477320030 |
| C | 6.74679302995561  | -0.01773226815268 | -4.20116009086392 |
| H | 7.53911410138211  | 0.04615027959076  | -0.87510483481190 |
| H | 8.62323245759300  | 0.02230822481056  | -3.09845145618909 |
| H | 7.24005159875383  | -0.02800326144412 | -5.17586194785922 |
| H | 4.76786922964905  | -0.05441883829255 | -5.02907670638688 |
| C | -5.22978755186109 | -0.15410474488961 | -4.43776669924332 |
| C | -7.44727138011700 | -0.16465039875510 | -3.46372385826016 |
| C | -6.92268375369043 | -0.13912821692321 | -2.19669297333163 |
| H | -7.58056862292145 | -0.13326160081883 | -1.32368548423496 |
| H | -8.53015669208447 | -0.17931937193425 | -3.60735164400293 |
| H | -4.56645265948566 | -0.15980098922887 | -5.30616007526878 |
| C | -6.59126236188827 | -0.17222082817859 | -4.59694207998645 |
| H | -7.02555776642617 | -0.19261612112965 | -5.59915926480948 |

**50, S<sub>0,eq</sub> in vacuum**

|   |                  |                   |                   |
|---|------------------|-------------------|-------------------|
| N | 1.33379127426031 | -0.03502462488823 | -1.50858655149070 |
| C | 1.34851009653612 | 0.00300090830777  | 0.91232296591905  |
| C | 0.69048074180455 | -0.02453533850949 | -0.37886621147820 |
| C | 3.47090581269695 | 0.00760884394075  | -0.30791398206107 |
| C | 0.62744835771118 | 0.01381441955633  | 2.11891633412031  |
| C | 2.76805475567368 | 0.01900752118031  | 0.92419570227720  |
| C | 2.69931881522899 | -0.01993133841590 | -1.51763744754378 |
| C | 3.48043656742055 | 0.04608520995642  | 2.15146768437416  |
| C | 4.88271130058408 | 0.02289316037823  | -0.33794260288332 |

|   |                   |                   |                   |
|---|-------------------|-------------------|-------------------|
| C | 1.35673822624690  | 0.04074043823814  | 3.32711020491144  |
| H | 0.82725633372499  | 0.04964472973545  | 4.27977345191170  |
| C | 4.76914550915589  | -0.01705424969803 | -2.80948651387698 |
| C | 3.35957203879701  | -0.03165795309808 | -2.73631865134310 |
| H | 2.75546749095764  | -0.05264904198348 | -3.64525593408355 |
| C | 5.55395214777189  | 0.01053293156273  | -1.61039220229041 |
| C | 2.73705230548948  | 0.05642873437921  | 3.34748447866026  |
| H | 3.26606861887793  | 0.07716389499146  | 4.30351208256846  |
| N | -1.36796174914113 | -0.06634608584311 | -1.57724893360608 |
| C | -1.52042402186670 | -0.03020772933041 | 0.84045884676253  |
| C | -0.79088749254151 | -0.04166883065283 | -0.41358482384840 |
| C | -3.58112406228916 | -0.07459083882843 | -0.50944133935117 |
| C | -0.84039267023005 | -0.00297010148286 | 2.08932088077175  |
| C | -2.93671219583146 | -0.04681164004516 | 0.79259107987072  |
| C | -2.72835343184114 | -0.08310993390810 | -1.66548231806329 |
| C | -3.66022603777018 | -0.03587594287526 | 1.99800173418672  |
| H | -4.75020225368515 | -0.04828457434474 | 1.98271230241360  |
| C | -4.95808458343996 | -0.09317869348308 | -0.69496718784842 |
| H | -5.63159660784587 | -0.08731174213439 | 0.16412705350525  |
| C | -1.60179166456535 | 0.00698392889818  | 3.25819585251731  |
| H | -1.11404283682042 | 0.02780947134702  | 4.23248100605517  |
| C | -4.67898559898879 | -0.12838741056432 | -3.13144665151265 |
| C | -3.29105721861045 | -0.10959264171447 | -2.94201970869648 |
| H | -2.60617700298154 | -0.11518082591304 | -3.79211303821393 |
| C | -5.53438023577838 | -0.11995031694892 | -1.97732184636563 |
| C | -2.99677700197228 | -0.00932344898928 | 3.21090156048676  |
| H | -3.56661773187257 | -0.00095477145021 | 4.14273072500029  |
| C | 6.96440011484498  | 0.02439765453860  | -1.73815425341332 |
| C | 5.42697724730686  | -0.02943939830213 | -4.06928313213099 |
| C | 7.57277752659892  | 0.01185474060131  | -2.97355570909600 |
| C | 6.79769787200282  | -0.01537726634002 | -4.15362553123486 |
| H | 7.58841265170036  | 0.04545286993888  | -0.84405933519118 |
| H | 8.66301845471122  | 0.02307170035855  | -3.04085795379738 |



|   |                   |                   |                   |
|---|-------------------|-------------------|-------------------|
| H | 7.28992996499408  | -0.02516088403503 | -5.12869309605048 |
| H | 4.81420464905000  | -0.05049464067574 | -4.97376970506269 |
| C | -5.27183393396835 | -0.15557737101895 | -4.42680389204602 |
| C | -7.48039801936075 | -0.16513521540268 | -3.43272184653983 |
| C | -6.94448852349364 | -0.13909981482362 | -2.17047289972265 |
| H | -7.59450650553311 | -0.13264290994950 | -1.29160068961117 |
| H | -8.56453357022967 | -0.17963155892446 | -3.56660240115125 |
| H | -4.61632681565176 | -0.16184931204740 | -5.30111411184030 |
| C | -6.63462965686608 | -0.17346677206016 | -4.57367860123529 |
| H | -7.07797994365108 | -0.19426645940450 | -5.57190973443753 |
| C | 4.90382197666741  | 0.06119855335907  | 2.10528533874572  |
| C | 5.57295323727932  | 0.05005685132425  | 0.91233151471504  |
| H | 5.45998260330201  | 0.08199157488460  | 3.04568512258301  |
| H | 6.66320467543037  | 0.06230154060876  | 0.92322291476163  |

**51**,  $S_{0,eq}$  in vacuum

|   |                  |                   |                   |
|---|------------------|-------------------|-------------------|
| N | 1.35229037017829 | -0.03530345686814 | -1.53152507210471 |
| C | 1.34635562188742 | 0.00248447577543  | 0.89138059190672  |
| C | 0.69959916291575 | -0.02505427065513 | -0.40619015017860 |
| C | 3.47832370687391 | 0.00756151526218  | -0.31213846348627 |
| C | 0.61636790101830 | 0.01316568426074  | 2.09581299019021  |
| C | 2.76535106874076 | 0.01870365330331  | 0.91450666313214  |
| C | 2.71706474446179 | -0.01995348239110 | -1.52856494272667 |
| C | 3.46878782557629 | 0.04577690449775  | 2.14772048701430  |
| C | 4.89043533253886 | 0.02308879552635  | -0.33093000978975 |
| C | 1.33743811559591 | 0.04006192105978  | 3.30961900091899  |
| H | 0.79998284442853 | 0.04876479451882  | 4.25793858704355  |
| C | 4.79739484301038 | -0.01652916516738 | -2.80373944854139 |
| C | 3.38771405724446 | -0.03138631082666 | -2.74232388036424 |
| H | 2.79103897354437 | -0.05234823361776 | -3.65614816091619 |
| C | 5.57210279495852 | 0.01101403039284  | -1.59790547562065 |
| C | 2.71733906700327 | 0.05590356159453  | 3.33896884282777  |
| H | 3.24037317875421 | 0.07659158327700  | 4.29829002945475  |

|   |                   |                   |                   |
|---|-------------------|-------------------|-------------------|
| N | -1.36512758155020 | -0.06727220055924 | -1.61179152823644 |
| C | -1.50309170307845 | -0.03068735849764 | 0.80716928387668  |
| C | -0.78042009358714 | -0.04239321044858 | -0.44991823117216 |
| C | -3.55987615461847 | -0.07463120566842 | -0.52011154148892 |
| C | -0.84590406226849 | -0.00371475860481 | 2.05260290141602  |
| C | -2.92098112510276 | -0.04744989784379 | 0.74648099080560  |
| C | -2.72767699846005 | -0.08381611506889 | -1.68943381722445 |
| C | -3.69644647964110 | -0.03723879419401 | 1.93596099078431  |
| C | -4.96839445810255 | -0.09199860269915 | -0.62224901332800 |
| C | -1.63783880449101 | 0.00603082129319  | 3.22167326639495  |
| H | -1.15749918561740 | 0.02689675842771  | 4.20001013791380  |
| C | -4.72856572137288 | -0.12842508101814 | -3.08524763974795 |
| C | -3.32500773577880 | -0.11033986626220 | -2.94066148708476 |
| H | -2.67496745022467 | -0.11691994466100 | -3.81755131897977 |
| C | -5.57356907813924 | -0.11953145652776 | -1.92727209660752 |
| C | -3.01706185328131 | -0.01012034293767 | 3.16950058240448  |
| H | -3.59615899203445 | -0.00183322410589 | 4.09625621591022  |
| C | 6.98351620802631  | 0.02512194833392  | -1.71394616564324 |
| C | 5.46590407025837  | -0.02860801661581 | -4.05808361529854 |
| C | 7.60228459263995  | 0.01286306858319  | -2.94420809572395 |
| C | 6.83720917006838  | -0.01430830016952 | -4.13086253092058 |
| H | 7.60003783650738  | 0.04613358463057  | -0.81468001725793 |
| H | 8.69304686049979  | 0.02425467637038  | -3.00225172281133 |
| H | 7.33764509739986  | -0.02385261091661 | -5.10174264328940 |
| H | 4.86081726864263  | -0.04961653128406 | -4.96772748378123 |
| C | -5.32128750808056 | -0.15563894537526 | -4.37688447978674 |
| C | -7.52012543569026 | -0.16479575749273 | -3.39117391135446 |
| C | -6.97556907843156 | -0.13853496437410 | -2.12651511023890 |
| H | -7.64463814590886 | -0.13239445346195 | -1.26539792801355 |
| H | -8.60551792160726 | -0.17899809770397 | -3.51355232963188 |
| H | -4.66308739345409 | -0.16205610249158 | -5.24910247485872 |
| C | -6.68585203247090 | -0.17348943357981 | -4.53058115811520 |
| H | -7.12771855212838 | -0.19434741476311 | -5.52931085332953 |

|   |                   |                   |                  |
|---|-------------------|-------------------|------------------|
| C | 4.89209999661323  | 0.06111166503104  | 2.11226228516203 |
| C | 5.57084606048563  | 0.05021518111434  | 0.92458712521650 |
| H | 5.44102273389614  | 0.08188339955954  | 3.05692324521576 |
| H | 6.66093832266289  | 0.06263266894549  | 0.94422602953071 |
| C | -5.11518562240894 | -0.05492273074493 | 1.81652822239993 |
| C | -5.72219778019086 | -0.08112896967199 | 0.59088748751658 |
| H | -5.71912744397456 | -0.04716040738035 | 2.72720832143063 |
| H | -6.81153343473640 | -0.09396097710892 | 0.54590851918698 |

**52, S<sub>0,eq</sub> in vacuum**

|   |                   |                   |                   |
|---|-------------------|-------------------|-------------------|
| N | 1.38665718972440  | 0.08589130202580  | -1.37925201774263 |
| C | 1.43575465128521  | 0.06552986359230  | 1.03175835521819  |
| C | 0.75568959638977  | 0.05333007557508  | -0.22190144485842 |
| C | 3.49907570507390  | 0.14976045811650  | -0.24679232289543 |
| C | 0.73326939586288  | 0.02921608176981  | 2.27334517159665  |
| C | 2.86019266417352  | 0.11587011345037  | 1.01309086323108  |
| C | 2.72623556515649  | 0.13285168042489  | -1.38761088059025 |
| C | 3.57222774489322  | 0.12984694640438  | 2.23769880693528  |
| H | 4.66373991503791  | 0.16846480280504  | 2.21961684730660  |
| C | 1.47679286767013  | 0.04491748549454  | 3.44474957581307  |
| H | 0.97634986690010  | 0.01851310526914  | 4.41301515808513  |
| C | 2.88363566487378  | 0.09482229584637  | 3.42707773063351  |
| H | 3.42635523036752  | 0.10543414708964  | 4.37508075245391  |
| N | -1.32165369677482 | -0.00706832008513 | -1.39249466001005 |
| C | -1.43244999227620 | -0.03552172205730 | 1.02242597279424  |
| C | -0.72377292924294 | 0.00196675183892  | -0.23612274784441 |
| C | -3.50602294335330 | -0.09563584086743 | -0.29813808199652 |
| C | -0.73714352002366 | -0.02300941381318 | 2.26432538330964  |
| C | -2.85070497161768 | -0.08538522848040 | 0.99110576151896  |
| C | -2.67964203343954 | -0.05430137444654 | -1.45407567967604 |
| C | -3.55812210726963 | -0.12242813126491 | 2.20851647883397  |
| H | -4.64756295632975 | -0.16084767553631 | 2.20729095213927  |
| C | -4.90479977556715 | -0.14371126246034 | -0.47100398325445 |

|   |                   |                   |                   |
|---|-------------------|-------------------|-------------------|
| H | -5.56181422261154 | -0.17626957477364 | 0.39944297408769  |
| C | -1.48179510451996 | -0.06106007610396 | 3.43996614921123  |
| H | -0.98158907902882 | -0.05294447994323 | 4.40848049231706  |
| C | -4.64371866787044 | -0.10910696808279 | -2.87783841131161 |
| H | -5.09537195943182 | -0.11467616436724 | -3.87251594152265 |
| C | -3.27362982495773 | -0.06189374163355 | -2.73792280198209 |
| H | -2.59999310128854 | -0.02901778707100 | -3.59589798430351 |
| C | -5.46377145165860 | -0.15035738534222 | -1.73454501758039 |
| H | -6.54987758842978 | -0.18792719968452 | -1.84556274230878 |
| C | -2.87876152550823 | -0.11029109279262 | 3.41060238540096  |
| H | -3.43475373744012 | -0.13923300035840 | 4.35036707639109  |
| H | 3.19897481965897  | 0.15823518004631  | -2.37577984877172 |
| H | 4.58900031157247  | 0.18863614941561  | -0.30780232062861 |

**53, S<sub>0,eq</sub> in vacuum**

|   |                   |                   |                   |
|---|-------------------|-------------------|-------------------|
| N | 1.36186722201721  | 0.05911781621566  | -1.38160335284801 |
| C | 1.42646917427254  | 0.06261417361492  | 1.03067195537982  |
| C | 0.73851433047279  | 0.03223302034786  | -0.22045559192513 |
| C | 3.48083320193664  | 0.15238460516559  | -0.26315503328165 |
| C | 0.73444233979930  | 0.03242996880663  | 2.27920682418802  |
| C | 2.84998971512081  | 0.12515646397375  | 1.00182304306788  |
| C | 2.70160243288236  | 0.11772485109292  | -1.39854231093455 |
| C | 3.57029100744937  | 0.15725516051251  | 2.22092591101703  |
| H | 4.66128466445320  | 0.20520485622382  | 2.19424363674846  |
| C | 1.48601092065835  | 0.06601220862497  | 3.44559452551201  |
| H | 0.99092298232550  | 0.04466673553250  | 4.41702501301387  |
| C | 2.89143954689287  | 0.12788957828283  | 3.41670402275574  |
| H | 3.44187129334687  | 0.15249778485496  | 4.35998841070275  |
| N | -1.36196367066557 | -0.05907164966332 | -1.38150192881410 |
| C | -1.42638385207942 | -0.06261687399603 | 1.03077818401463  |
| C | -0.73852327937703 | -0.03221038112620 | -0.22040059048658 |
| C | -3.48084533451229 | -0.15236099379464 | -0.26289589400839 |
| C | -0.73426297563479 | -0.03245805906250 | 2.27926147862571  |

|   |                   |                   |                   |
|---|-------------------|-------------------|-------------------|
| C | -2.84990652199204 | -0.12515850958933 | 1.00203518462774  |
| C | -2.70170015329536 | -0.11767829810188 | -1.39834118825376 |
| C | -3.57011591863128 | -0.15728194581743 | 2.22119164960416  |
| H | -4.66111159003571 | -0.20523102164768 | 2.19459111199813  |
| C | -1.48574361717084 | -0.06606397939025 | 3.44570522844066  |
| H | -0.99058238674700 | -0.04473834809439 | 4.41709879669485  |
| C | -2.89117437041313 | -0.12794072583454 | 3.41691927382310  |
| H | -3.44153547974432 | -0.15256814660448 | 4.36024437066295  |
| H | -4.57000713914919 | -0.20015577683256 | -0.33086473421221 |
| H | -3.16800108869814 | -0.13762434738525 | -2.38965349896610 |
| H | 3.16782867389652  | 0.13769100691029  | -2.38988935522344 |
| H | 4.56998987262176  | 0.20018082678131  | -0.33120514192362 |
